# Supplementary material for: LA-ICPMS U–Pb geochronology of detrital zircon grains from the Coconino, Moenkopi, and Chinle formations in the Petrified Forest National Park (Arizona)
Source: Copernicus journal article supplement (doi:10.5194/gchron-2-257-2020), 2020-09-23

## Appendix 1 (Sample Images)

Sample 52-2

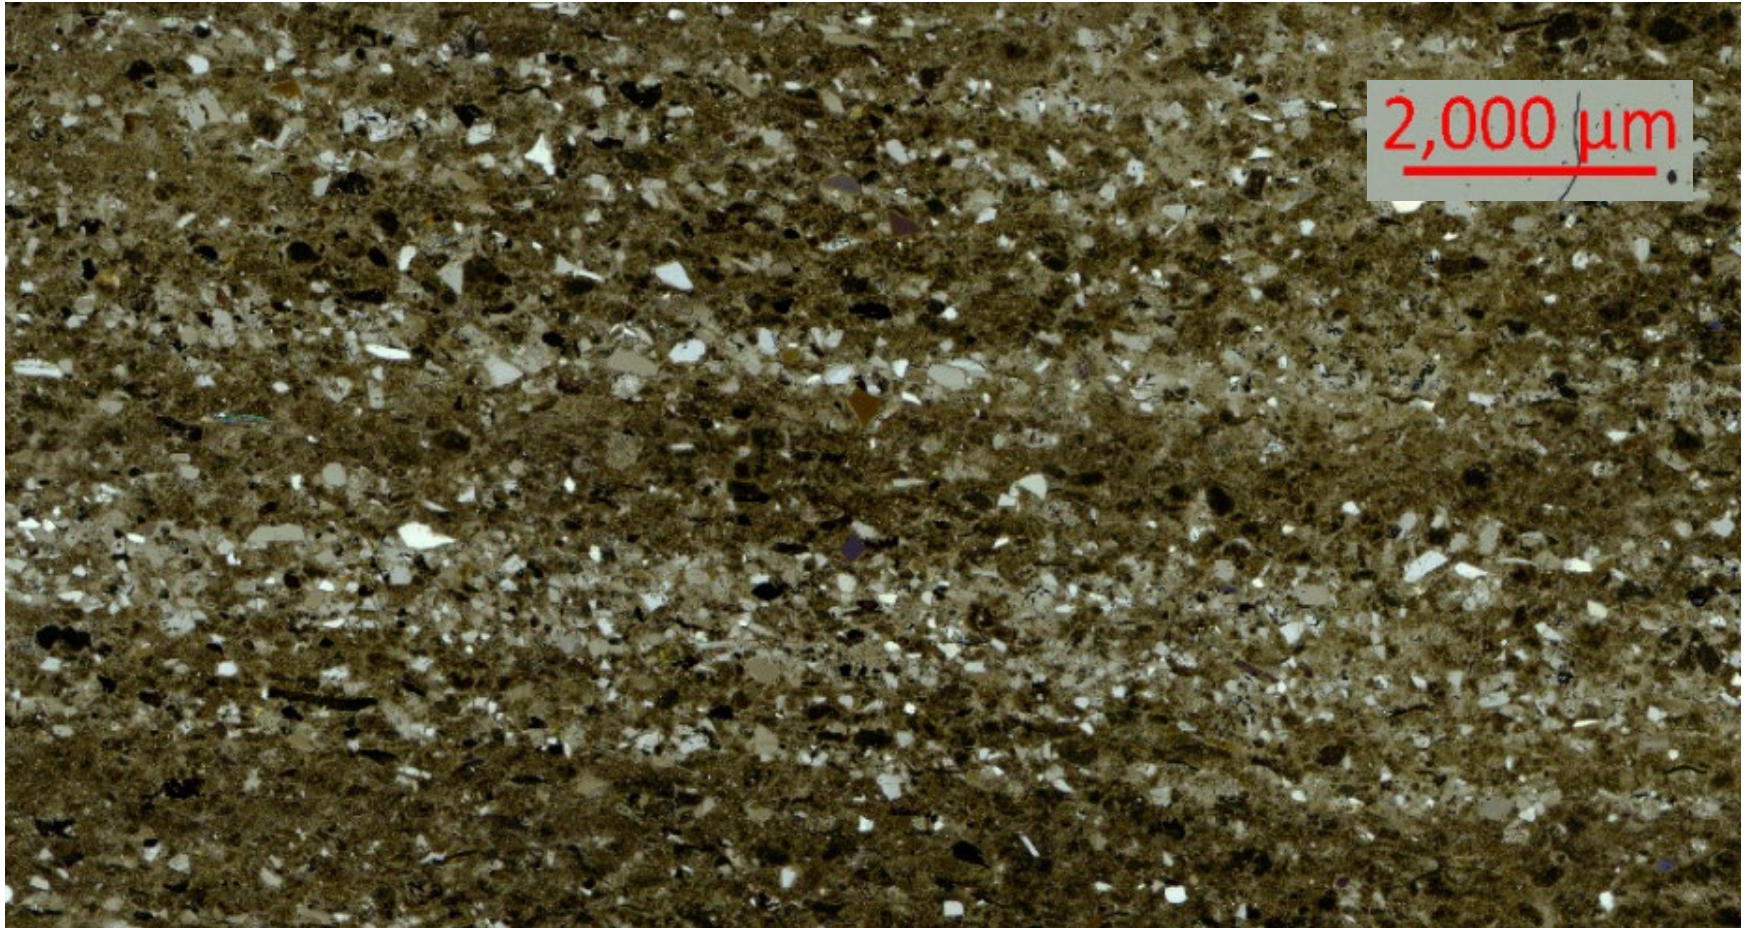



Sample 52-2

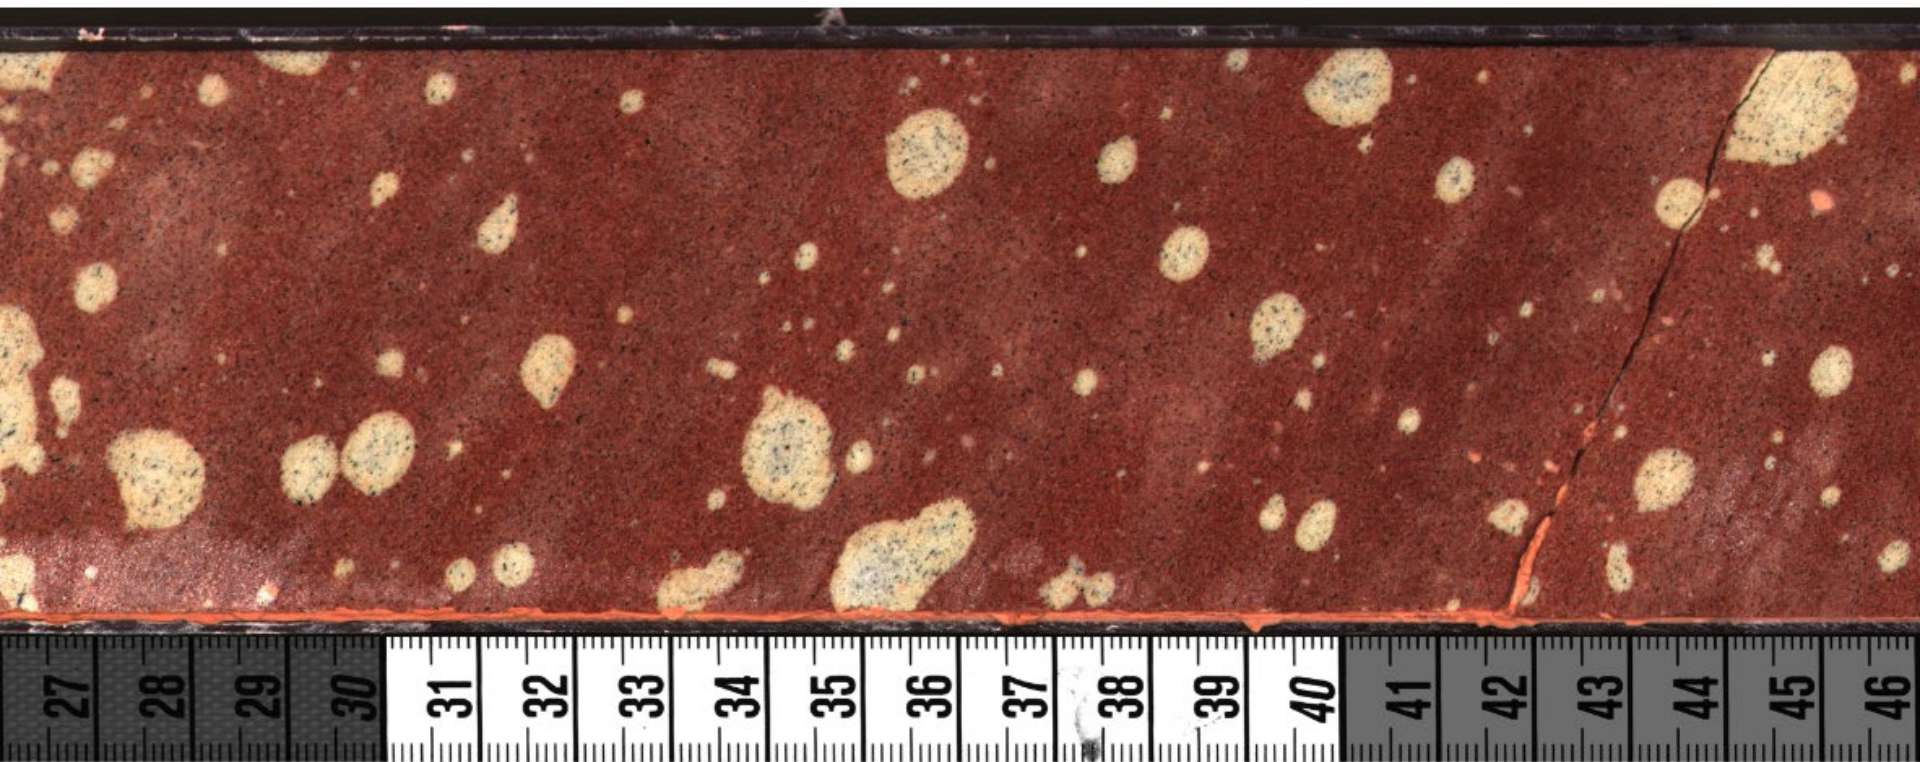

Sample 66-1  
(no thin section image available)

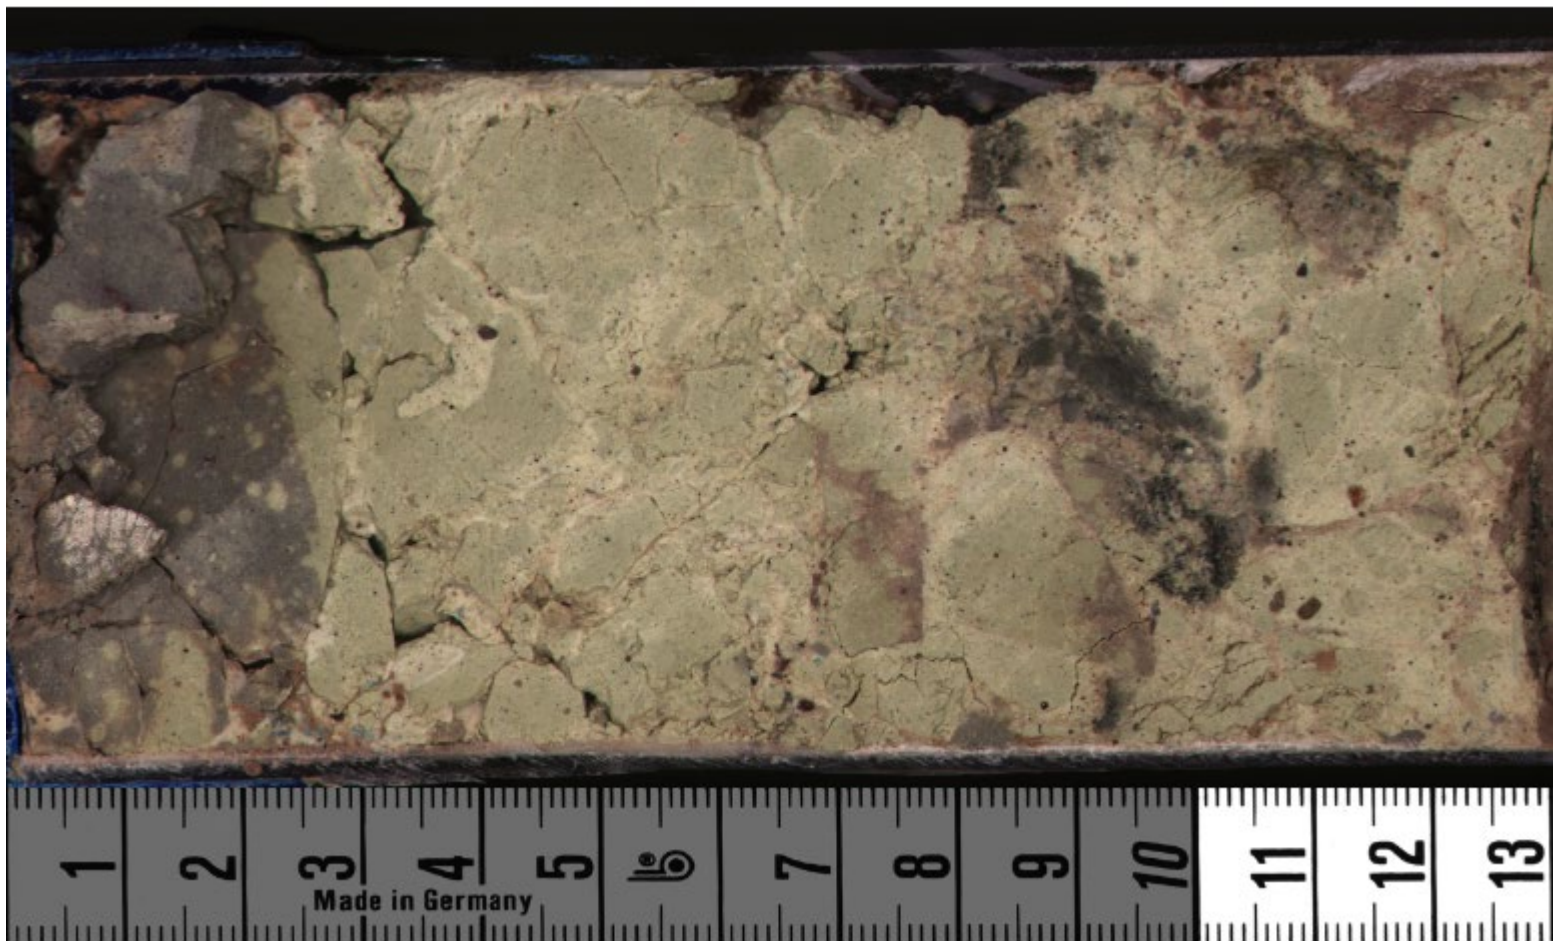



Sample 84-2  
(no thin section image available)

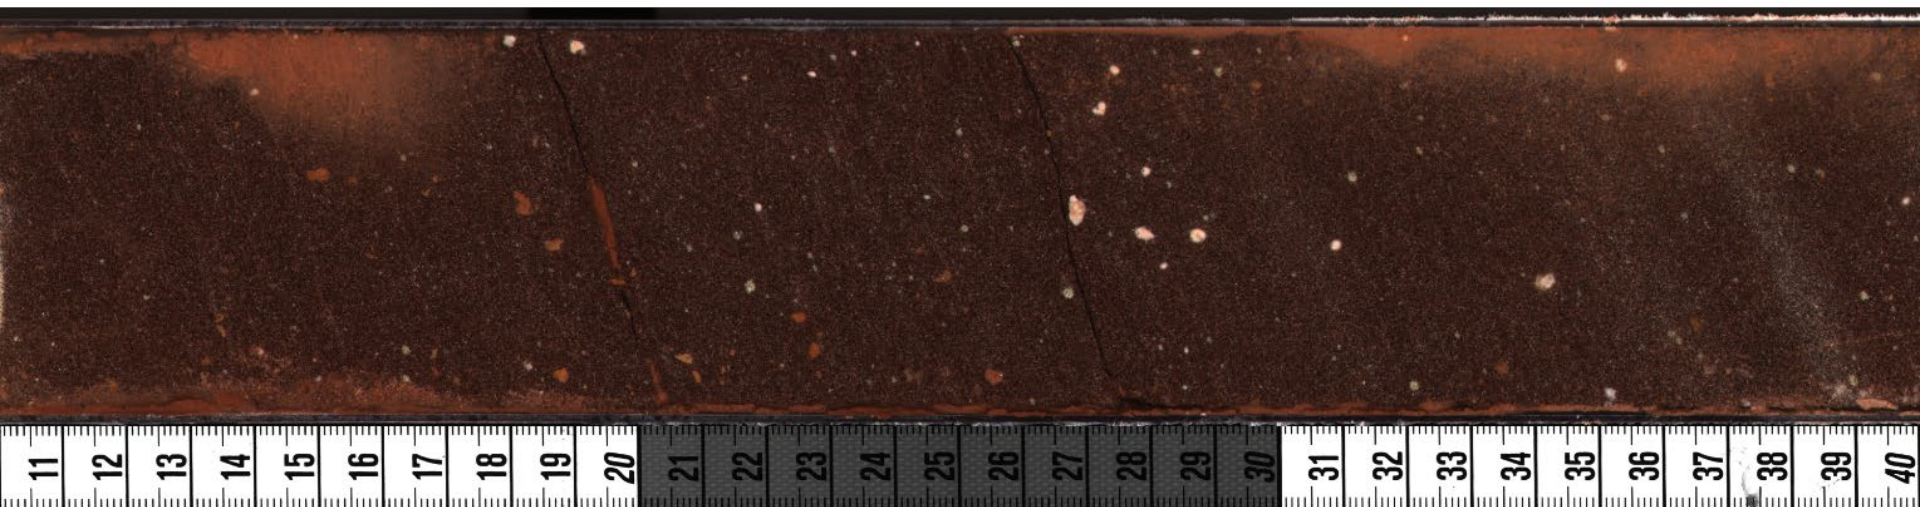



Sample 92-2

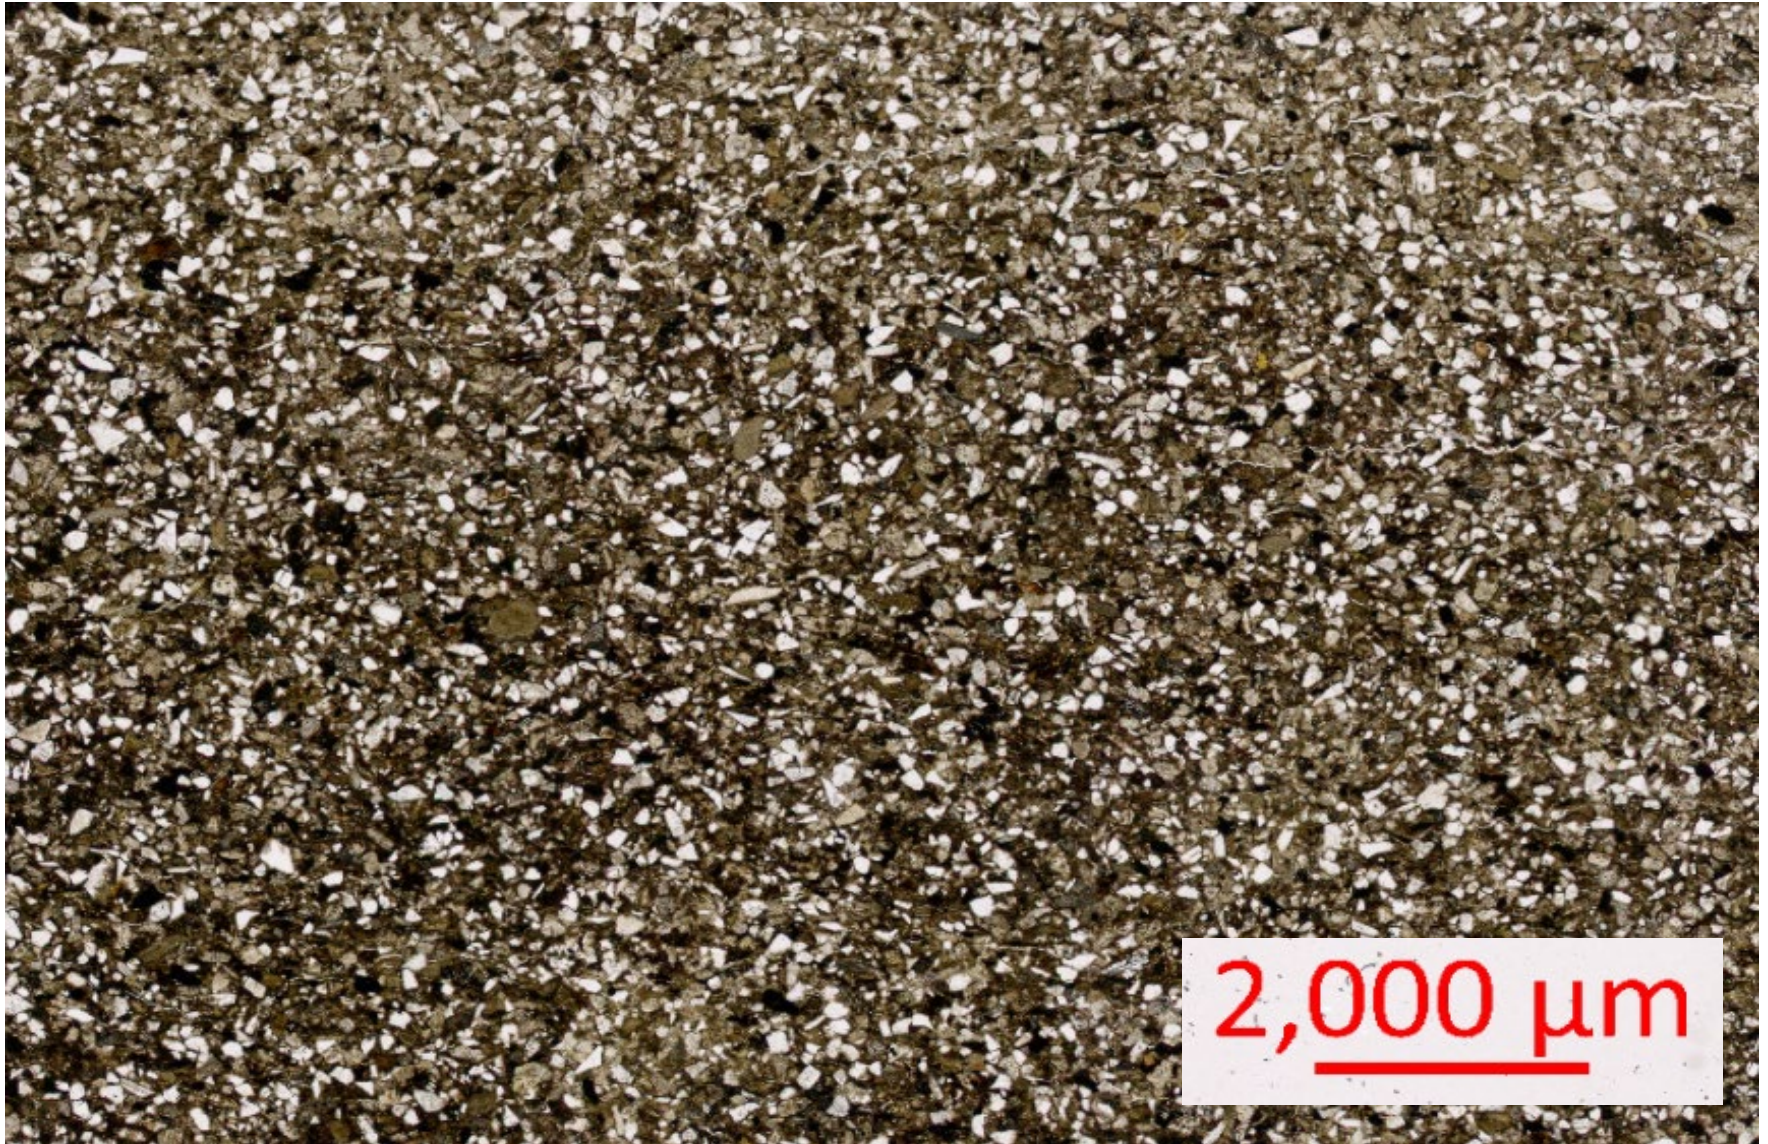



Sample 92-2

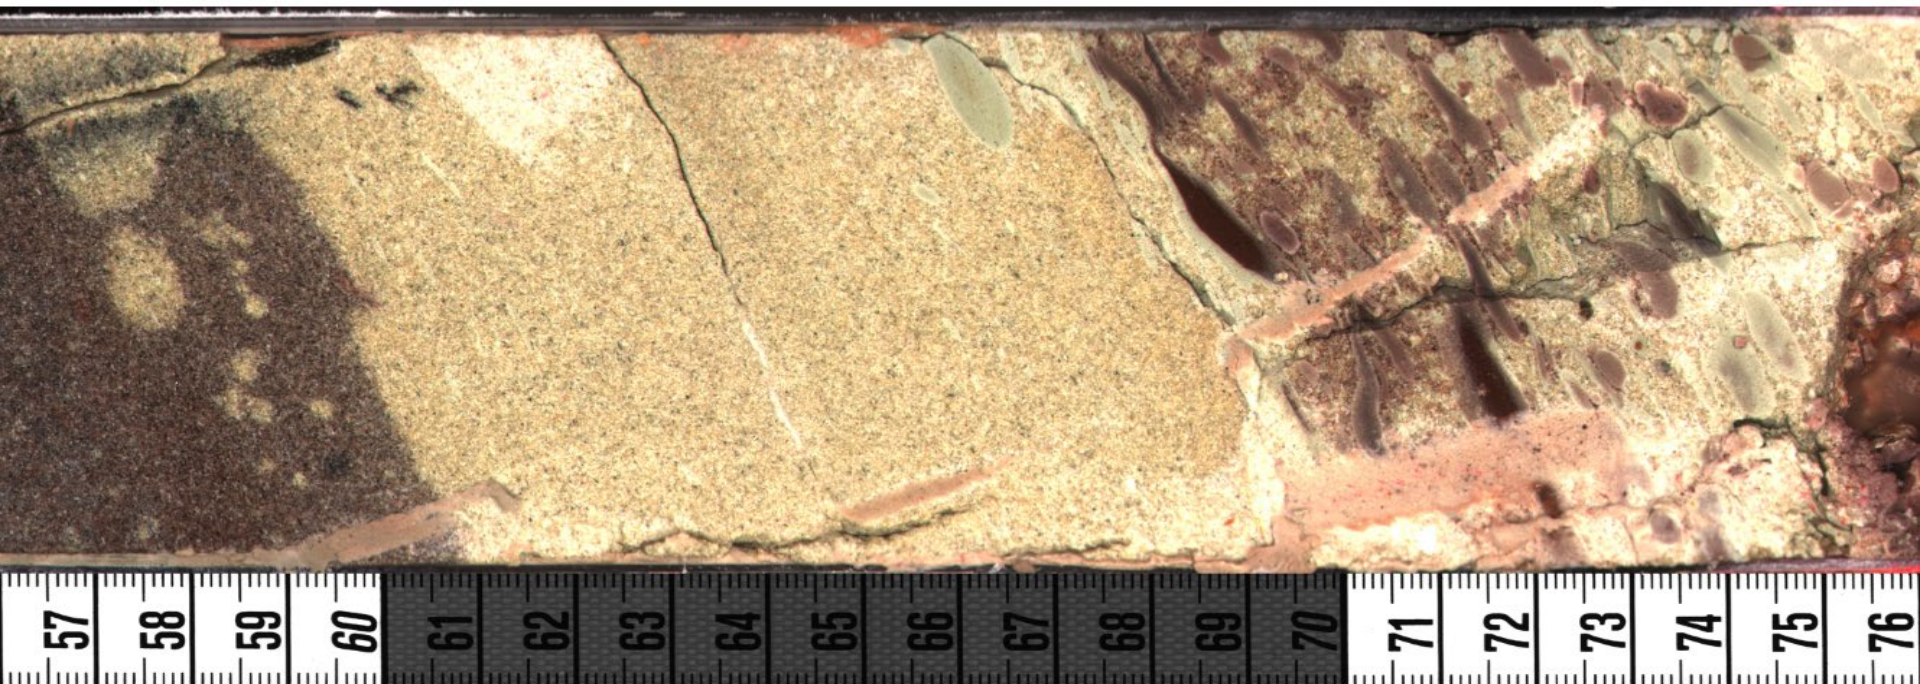



Sample 104-3

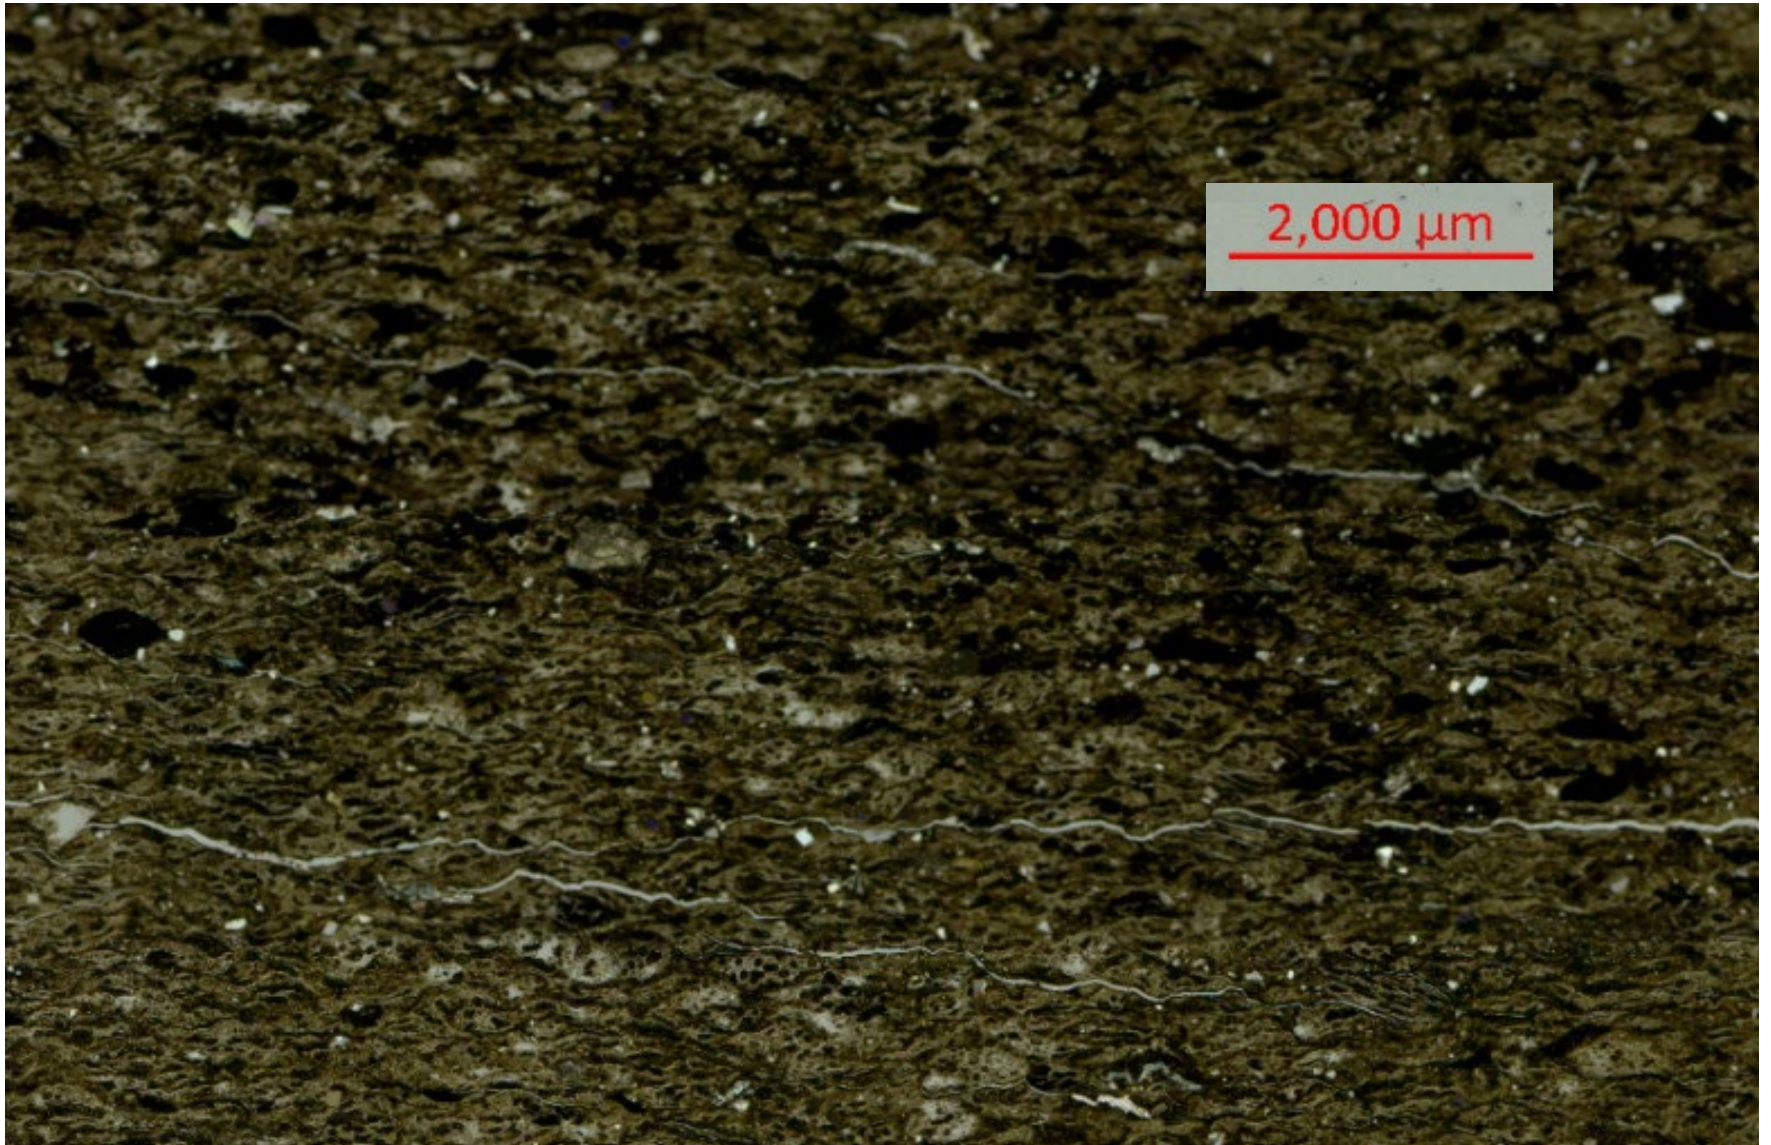



Sample 104-3

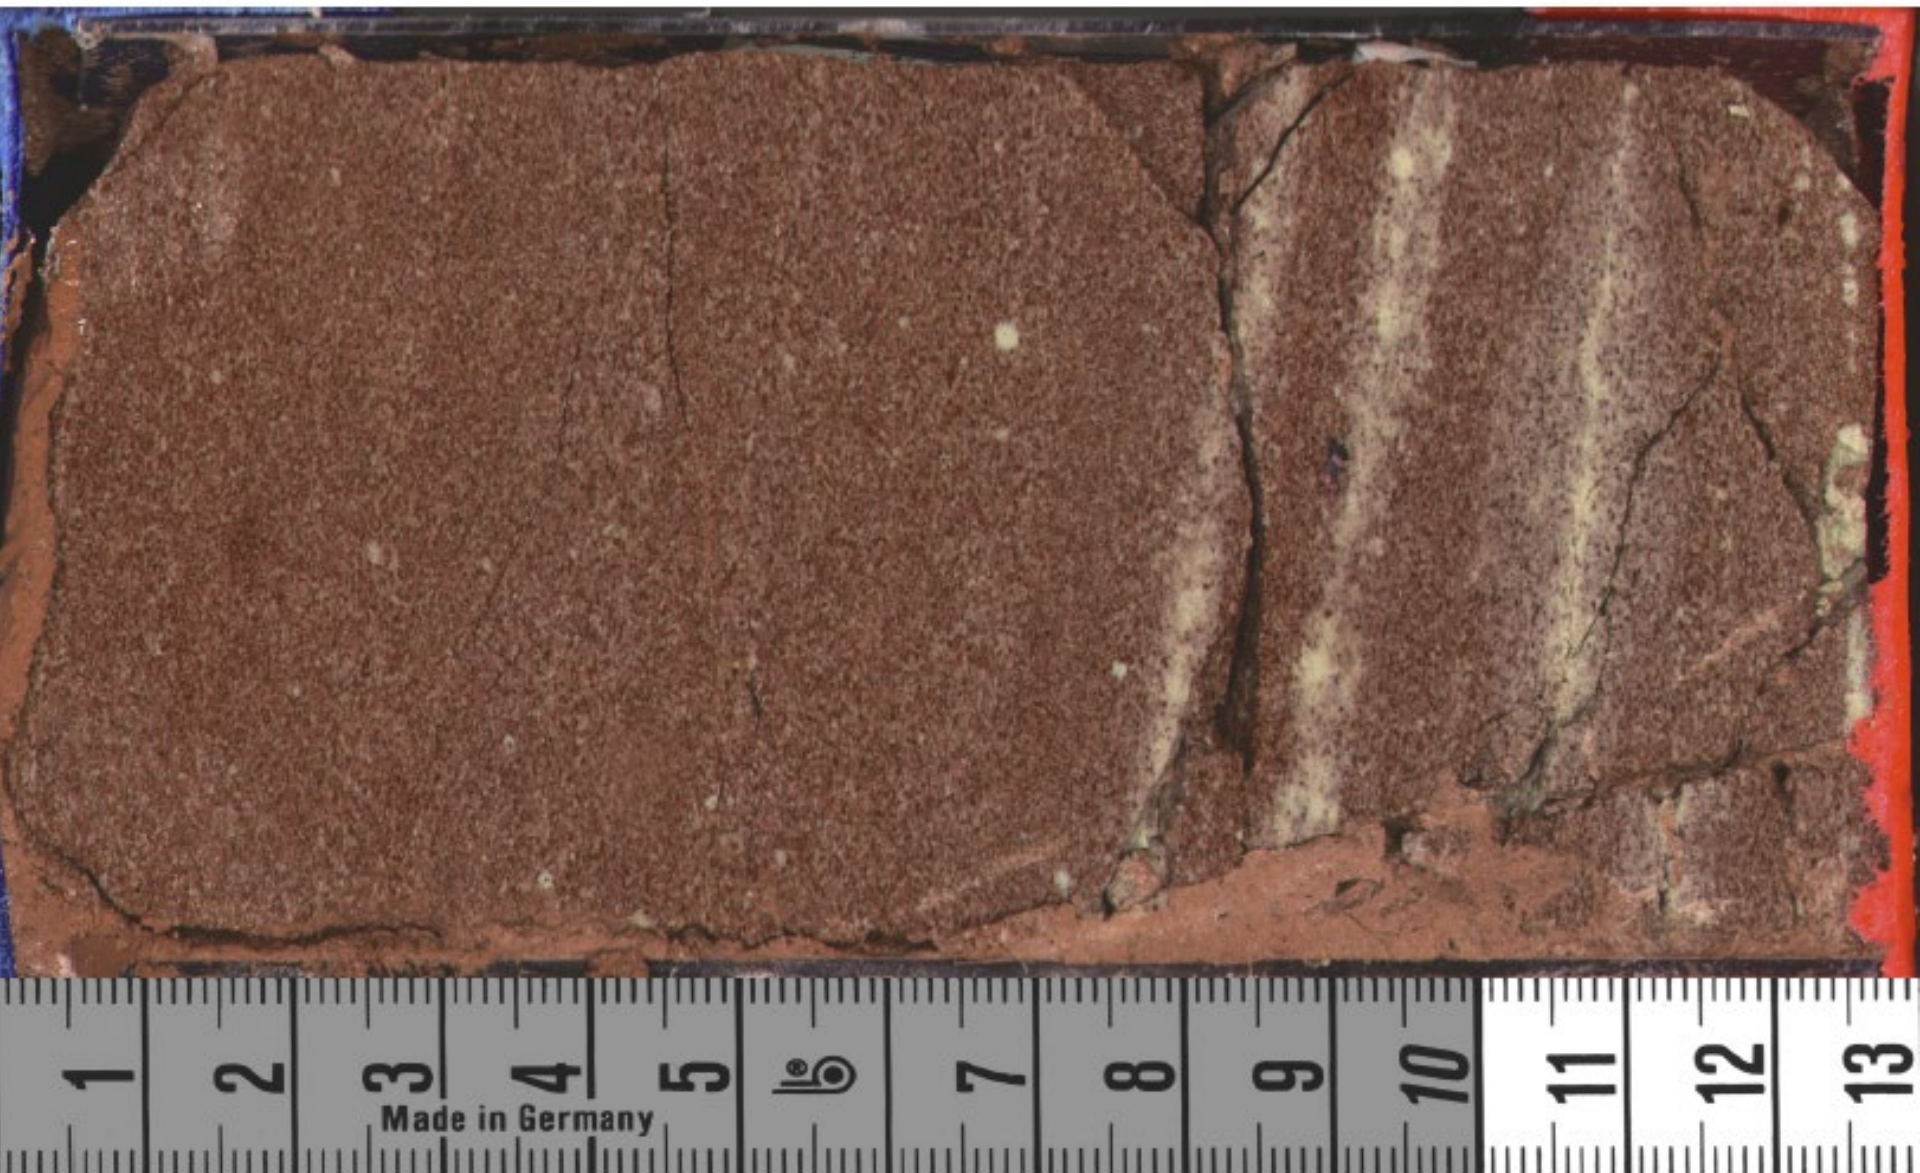



Sample 116-1  
(no thin section image available)

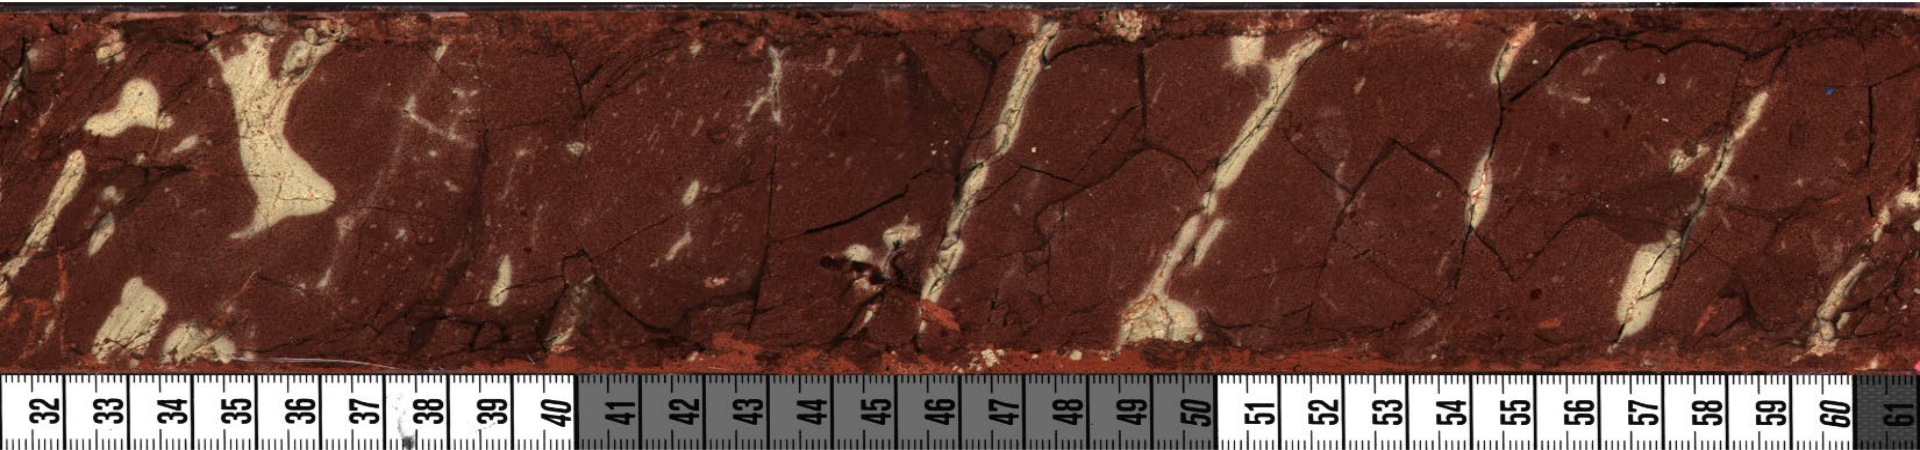



Sample 131-2

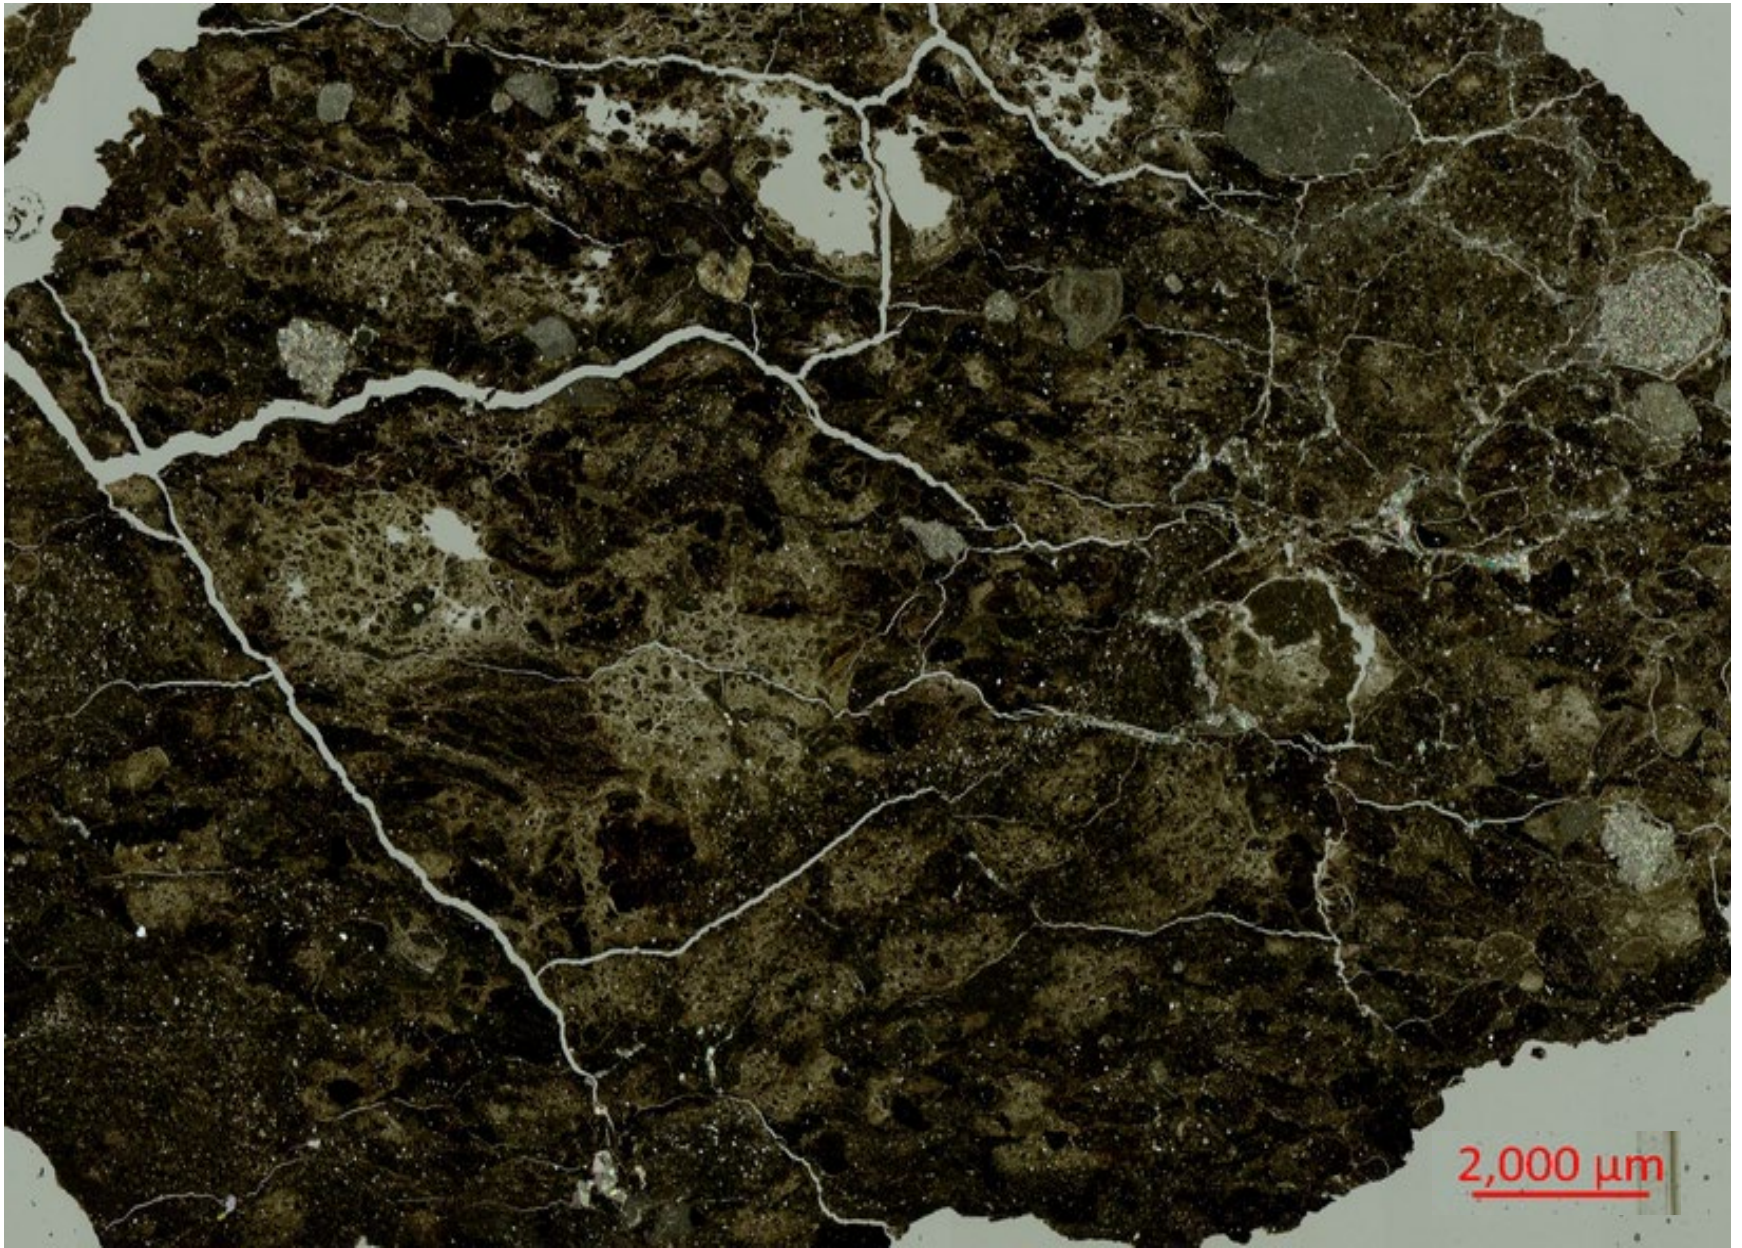



Sample 131-2

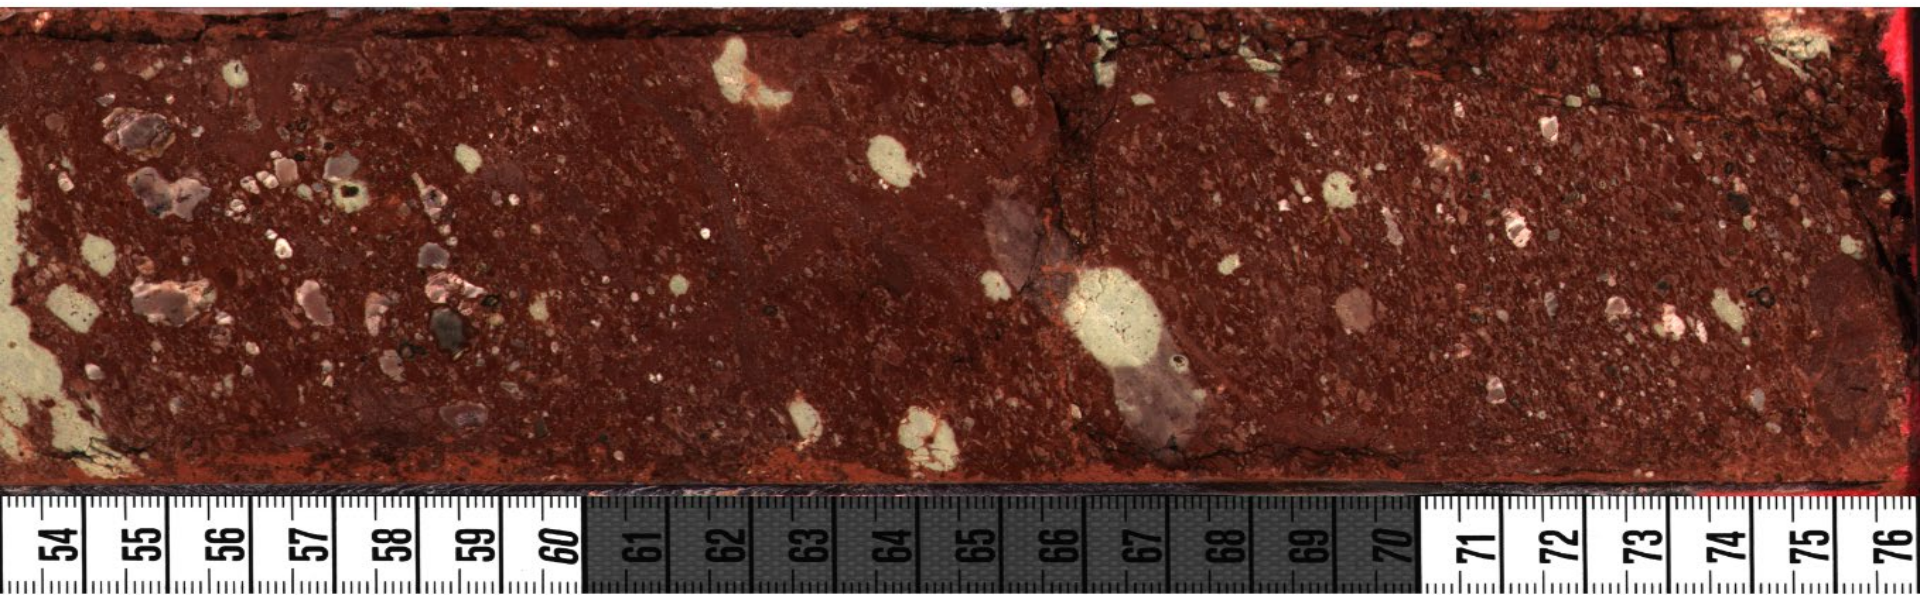



Sample 158-2

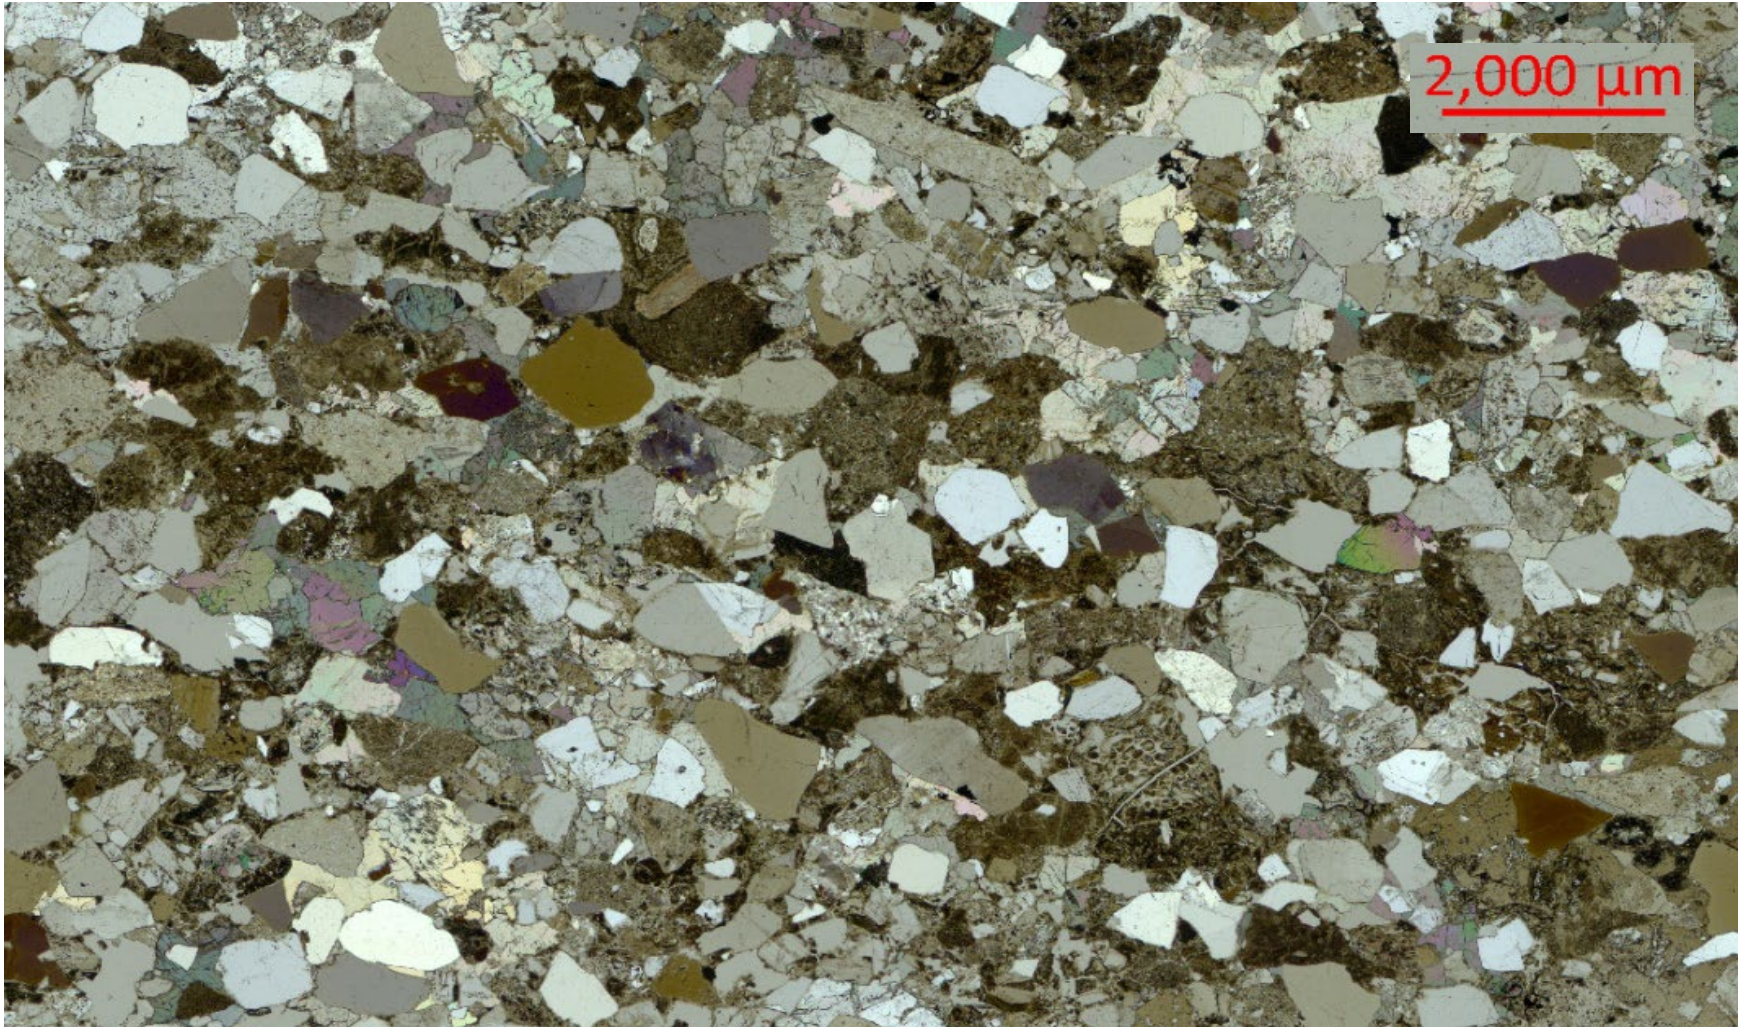



Sample 158-2

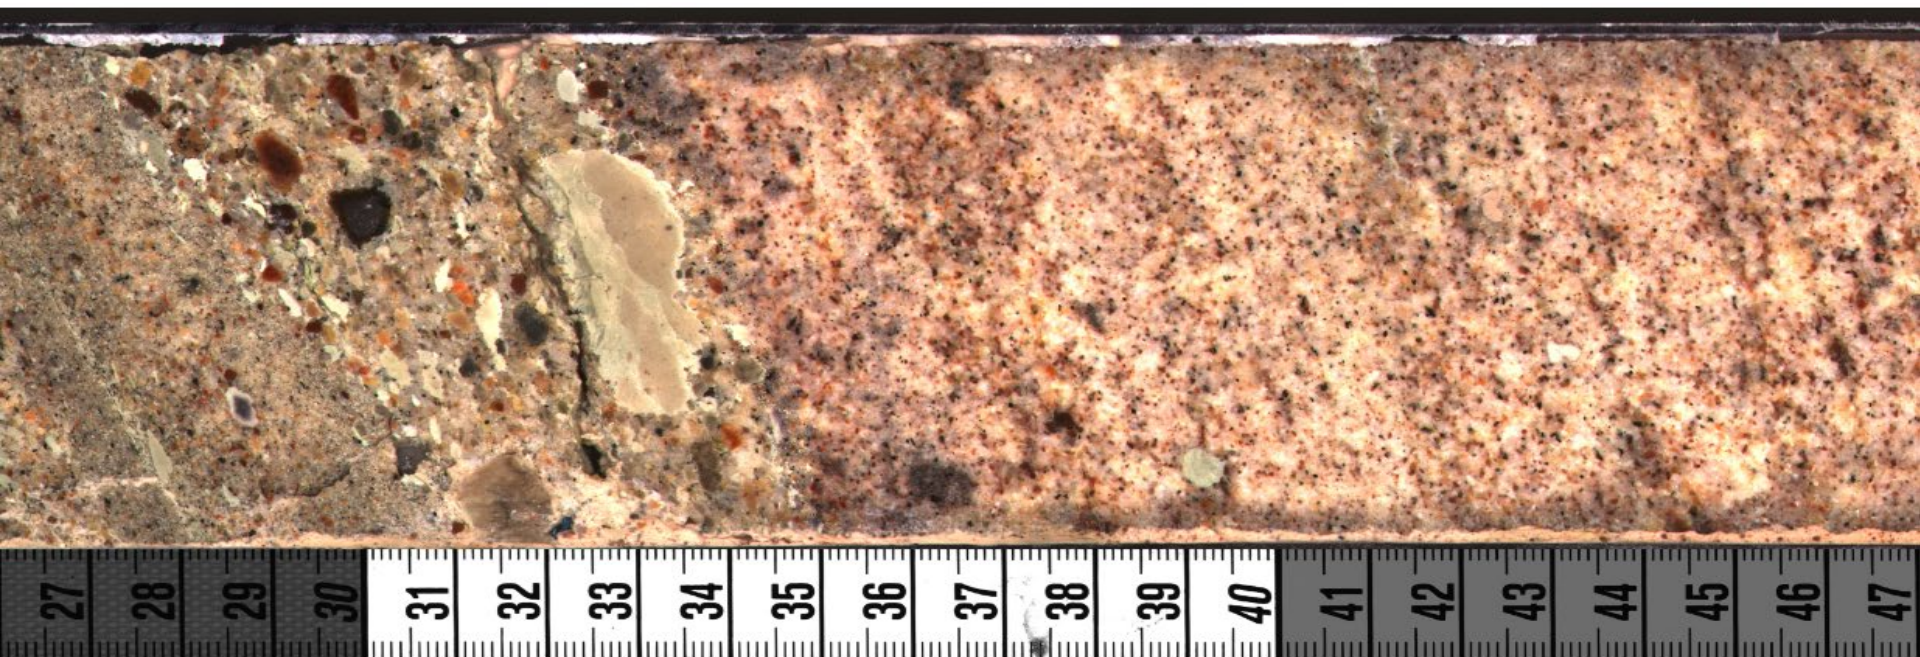



Sample 169-1  
(no thin section image available)

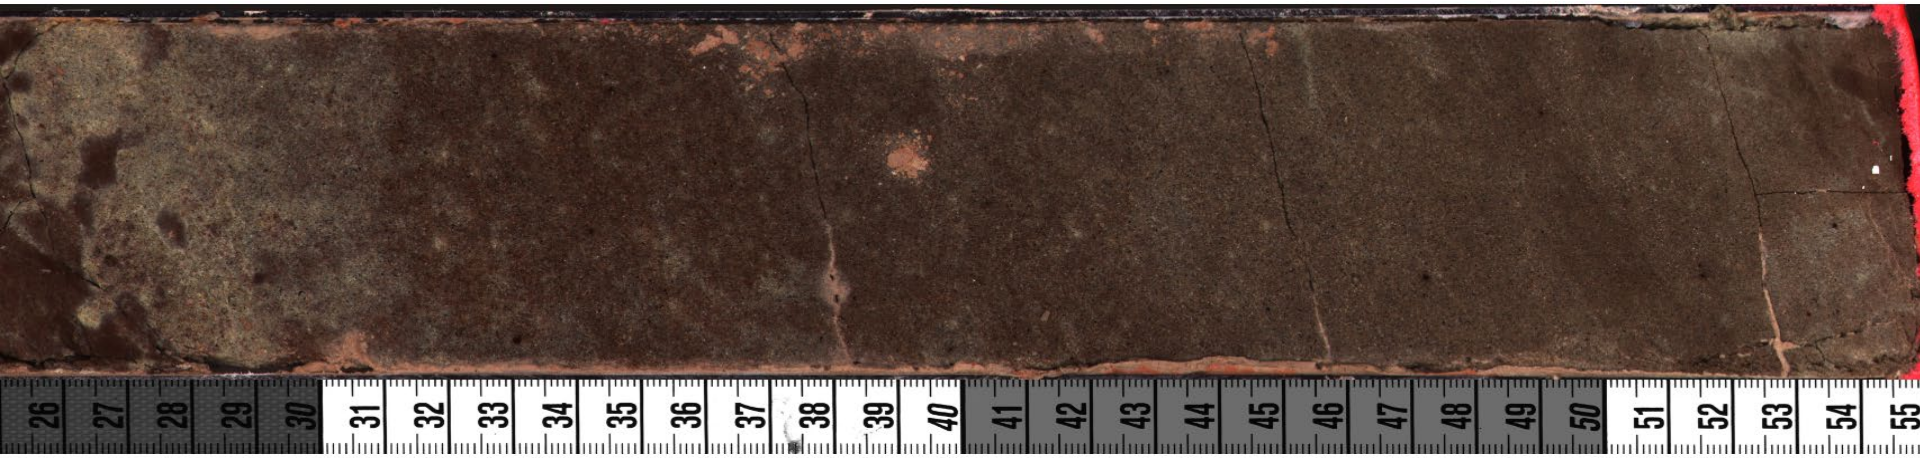



Sample 177-1

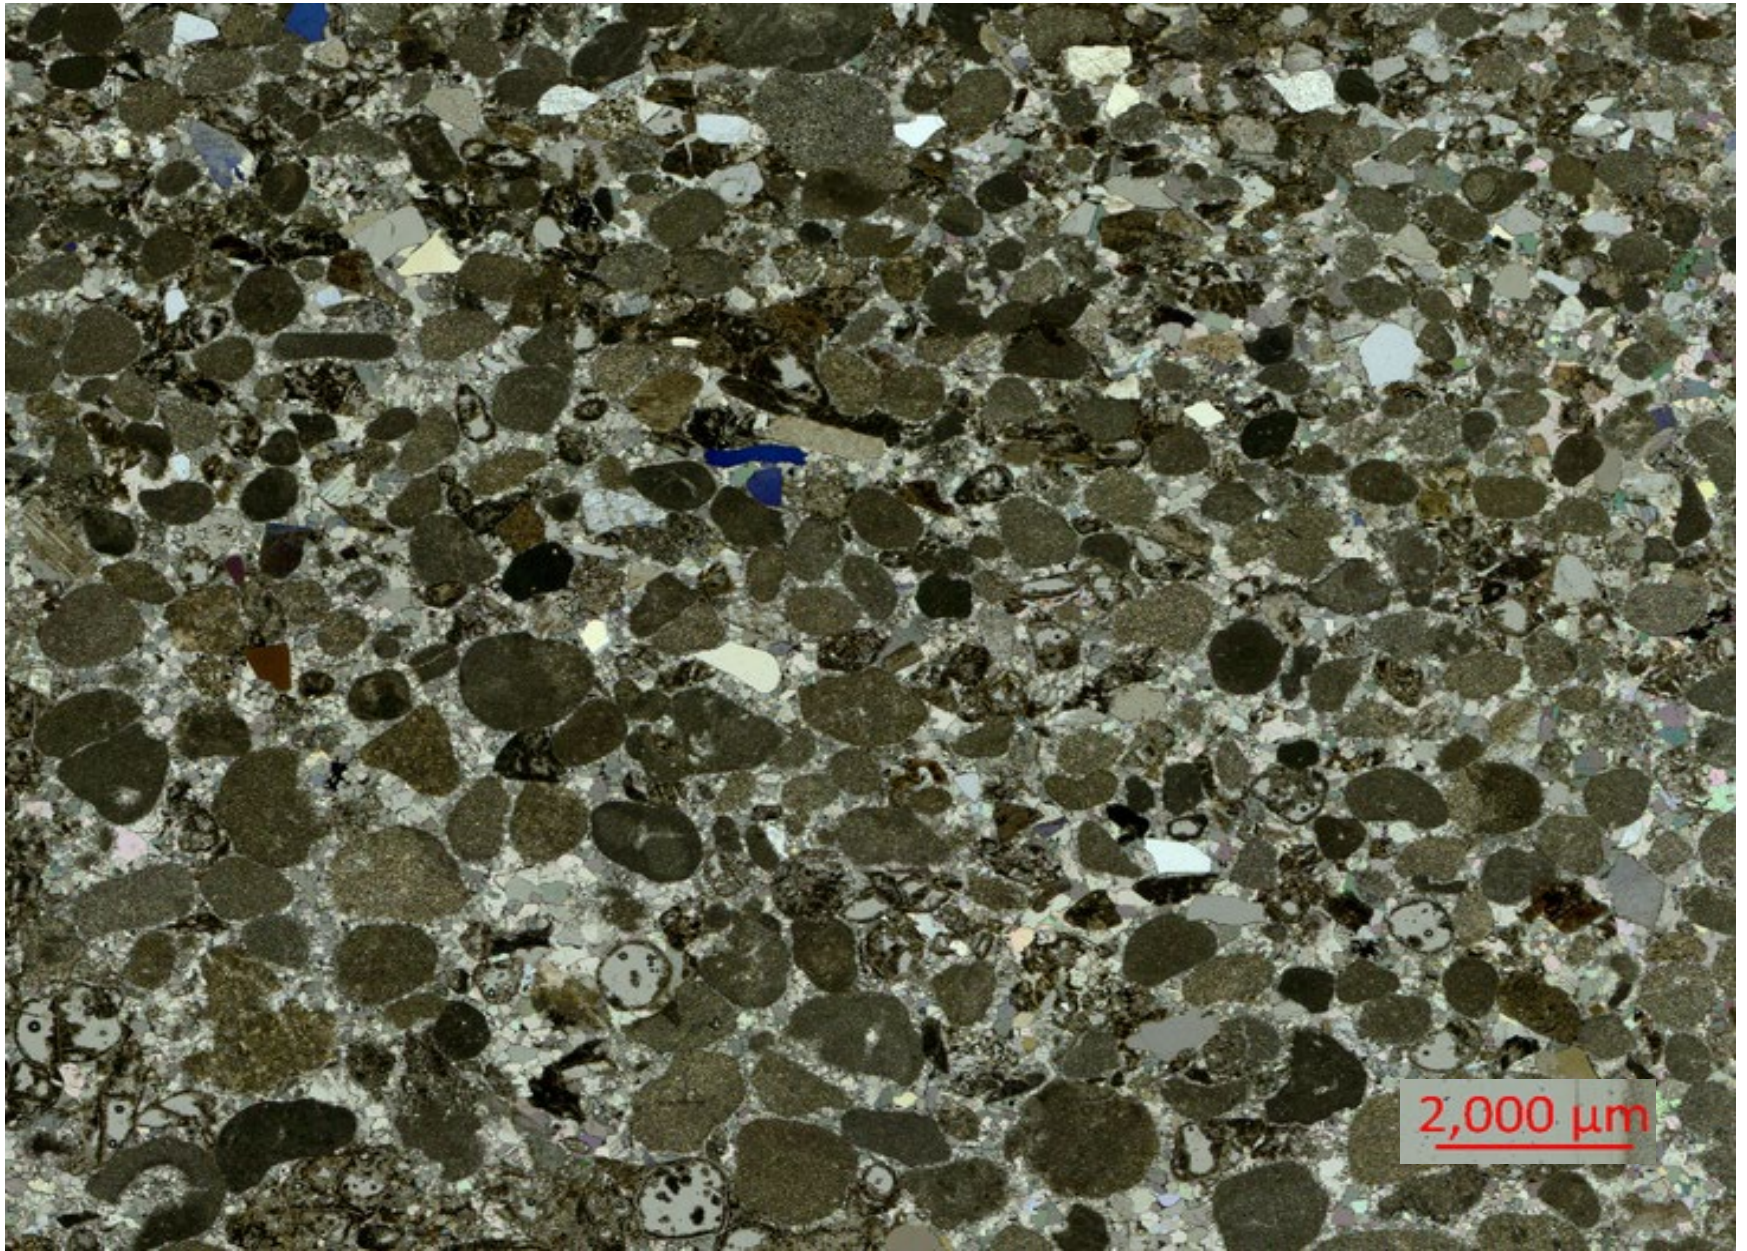



Sample 177-1

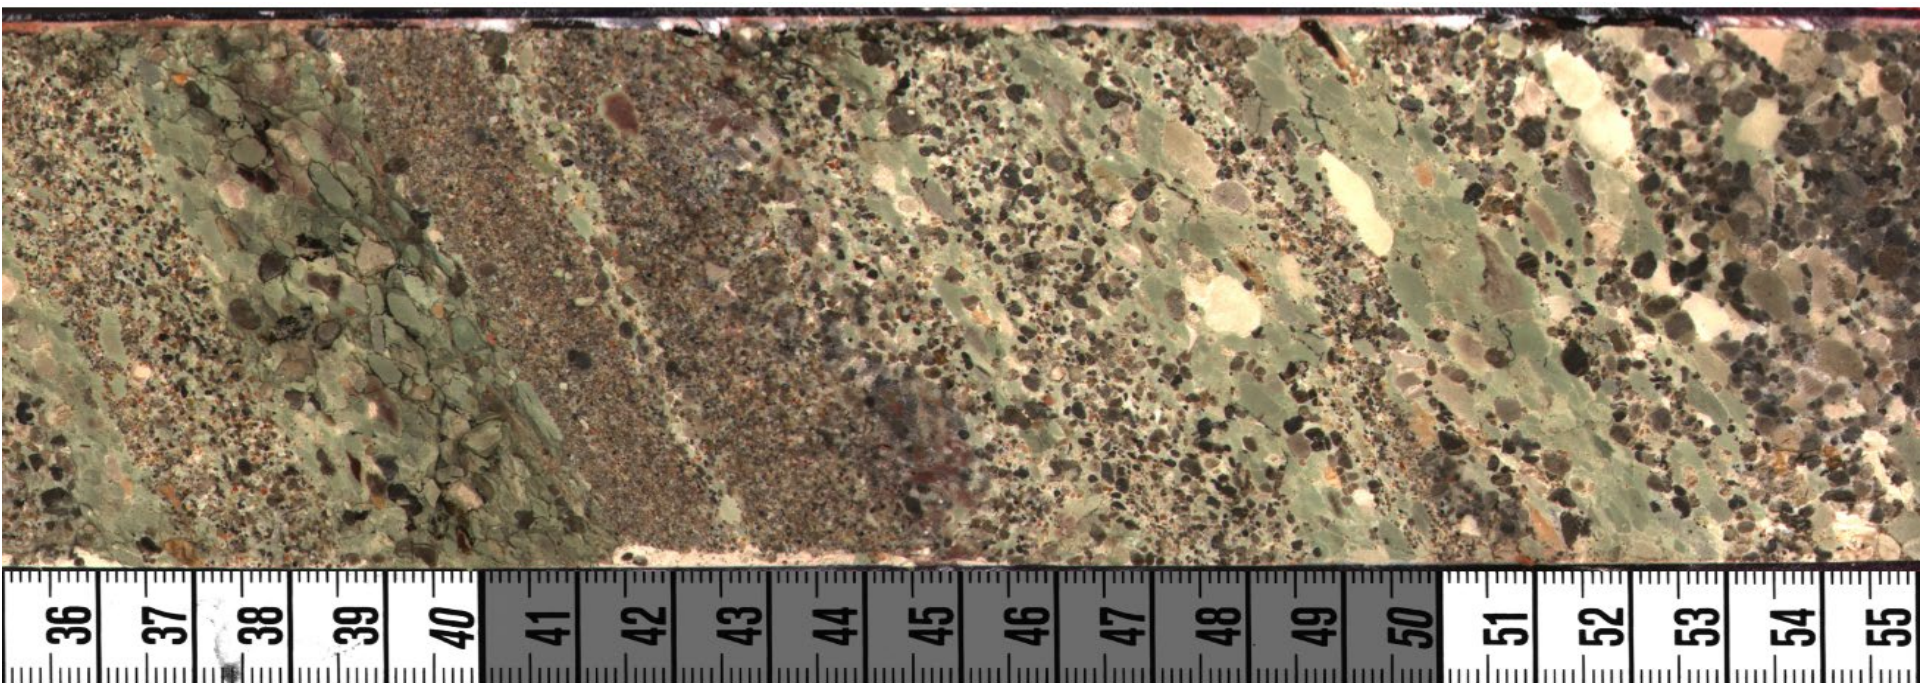



Sample 182-1  
(no thin section image available)

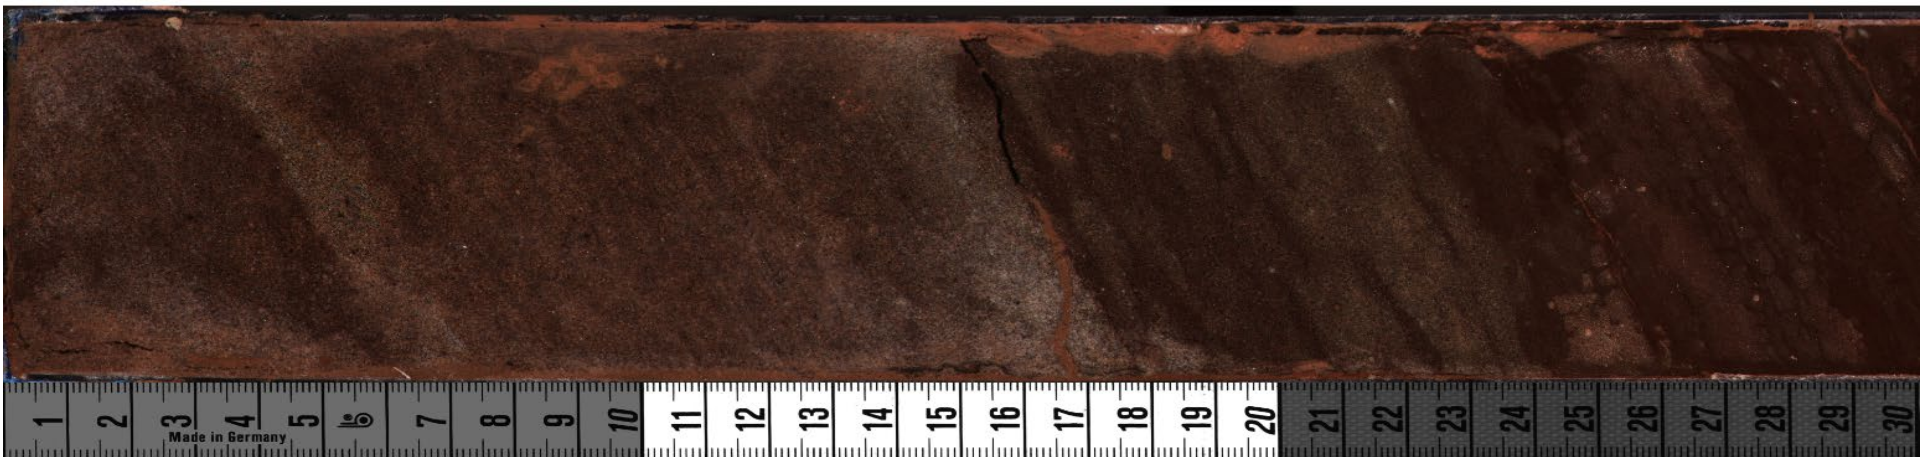



Sample 188-2

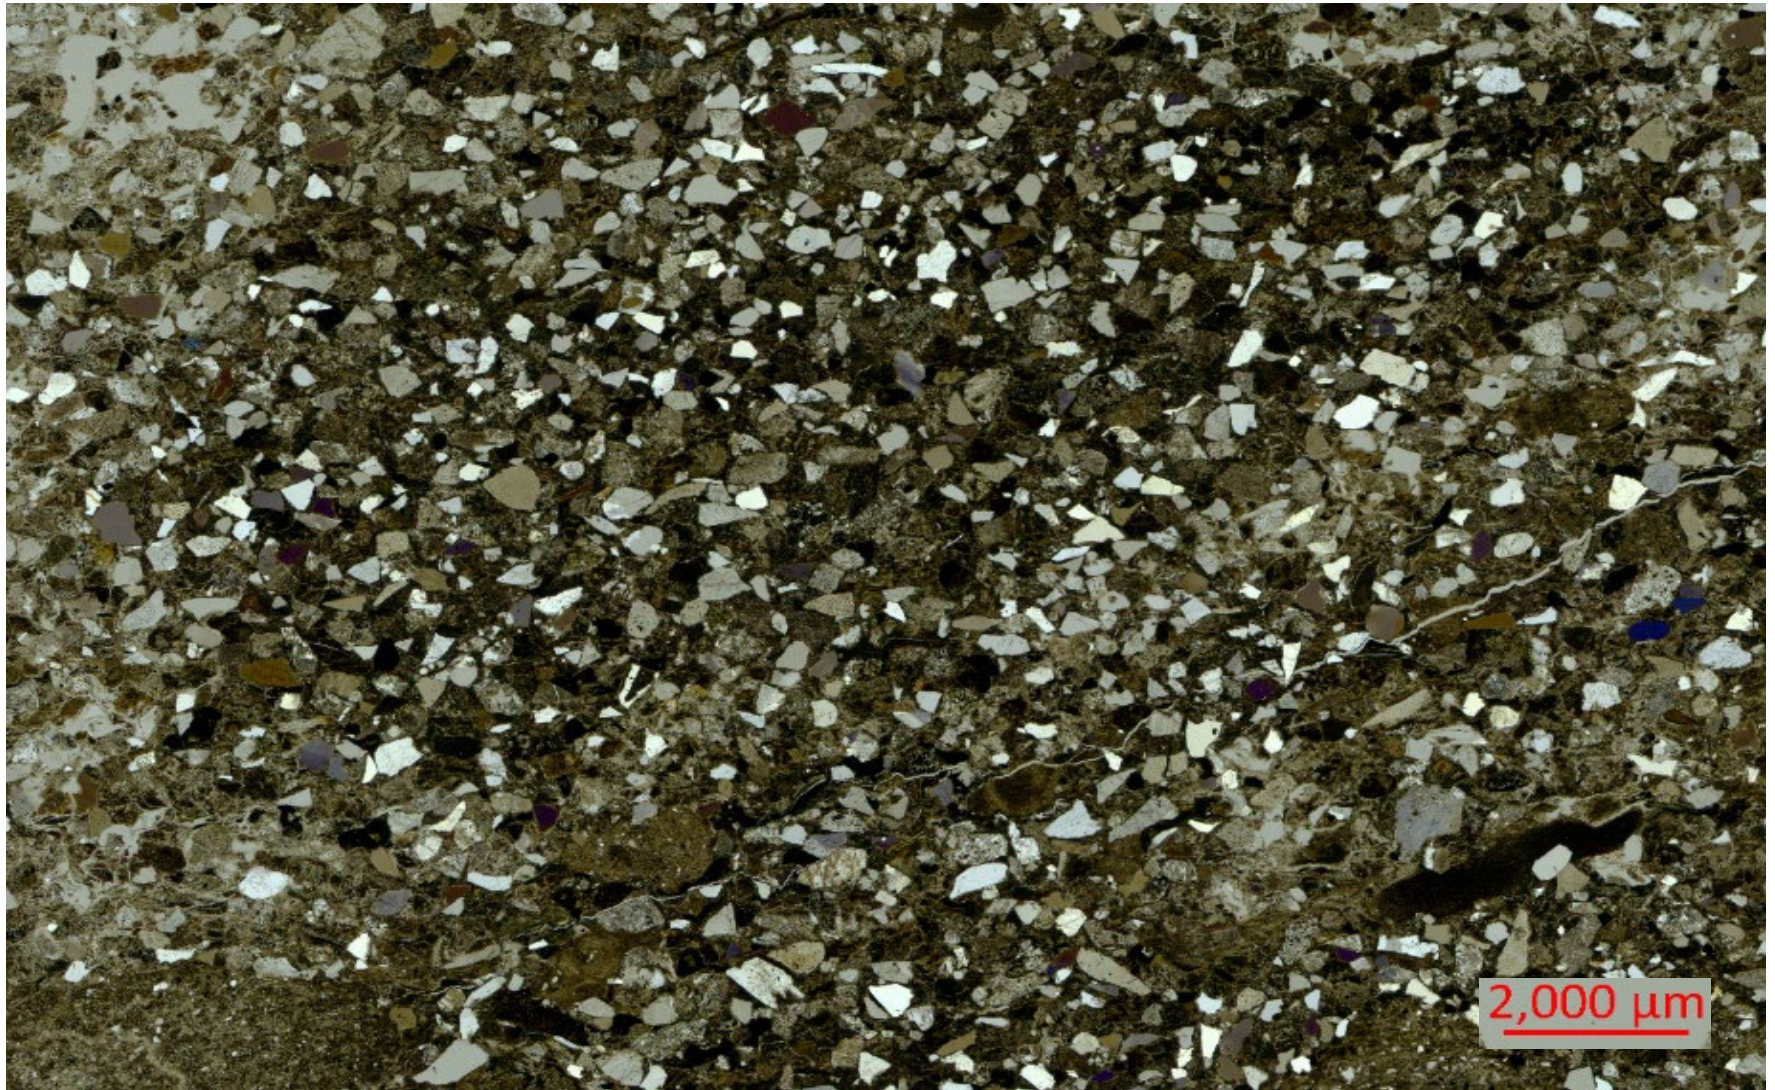



Sample 188-2

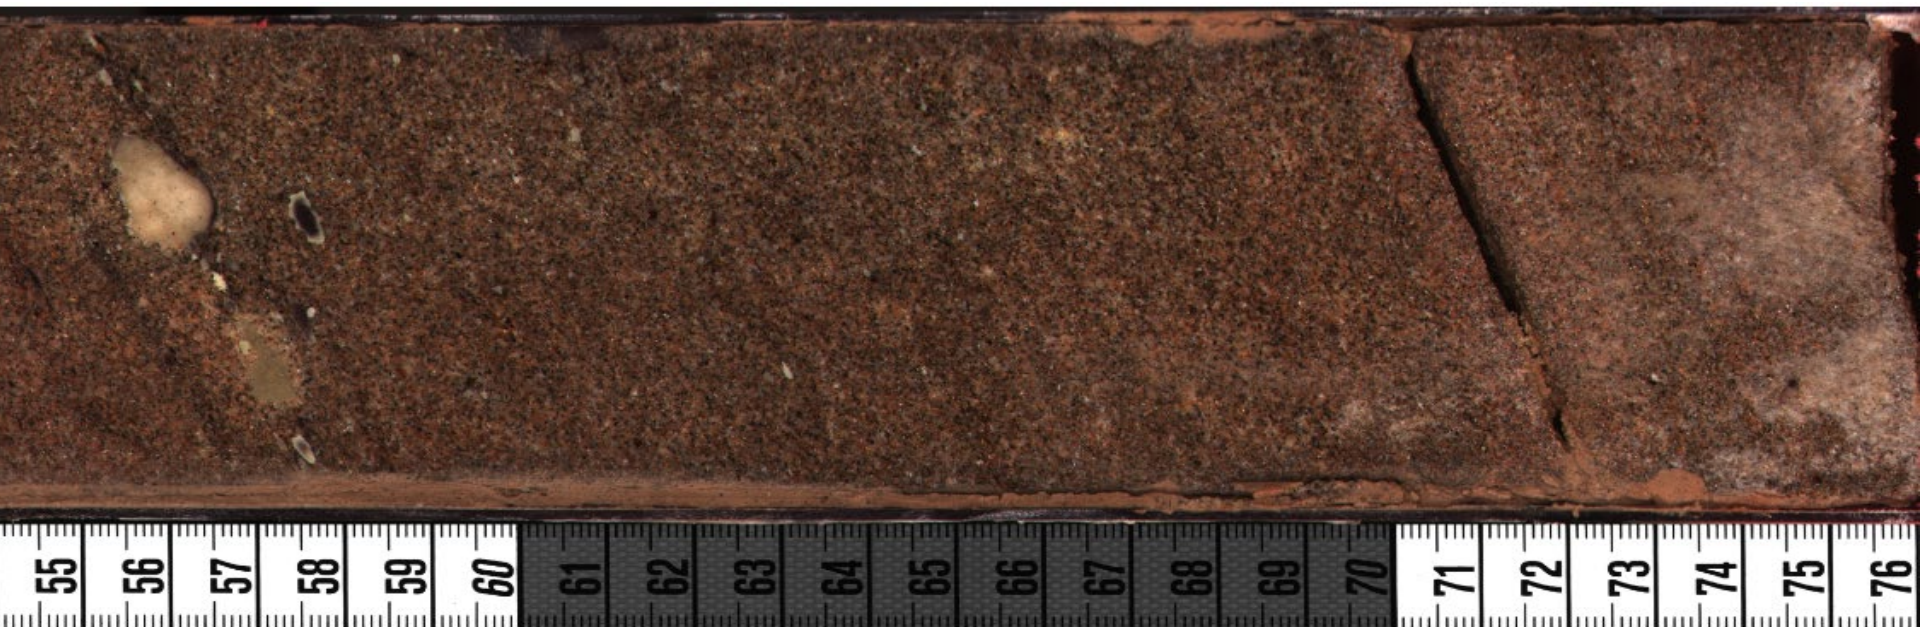



Sample 195-2

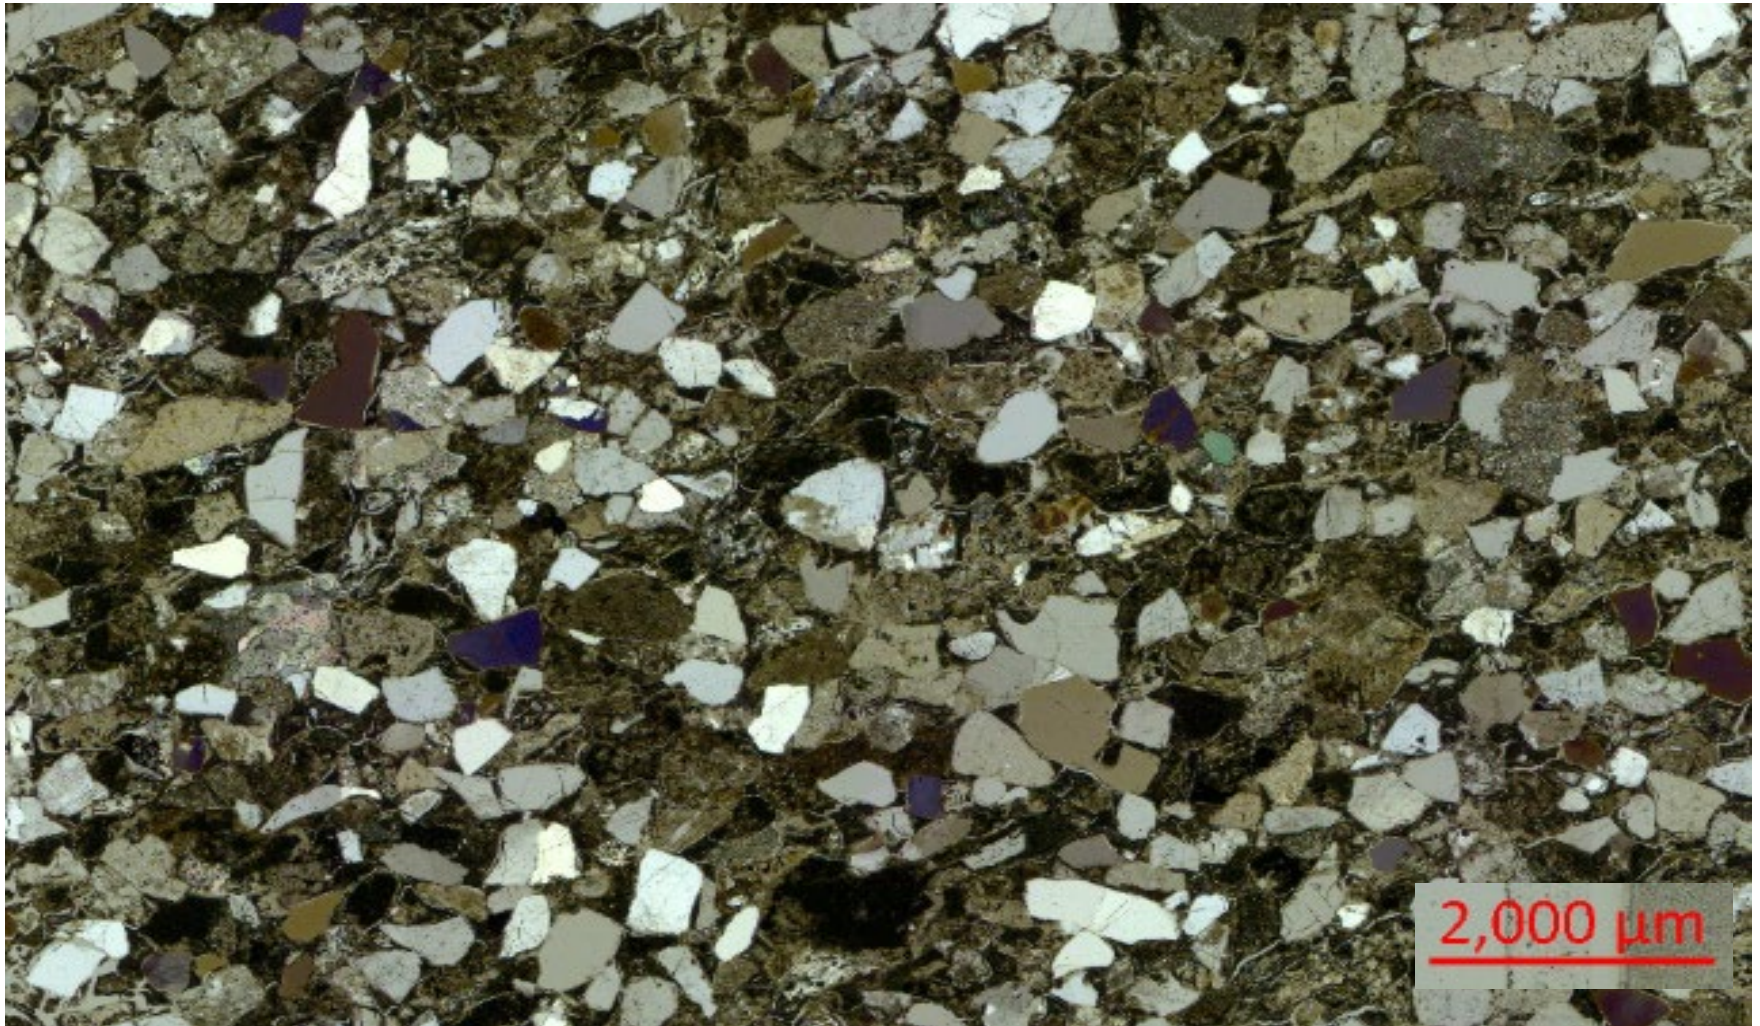



Sample 195-2

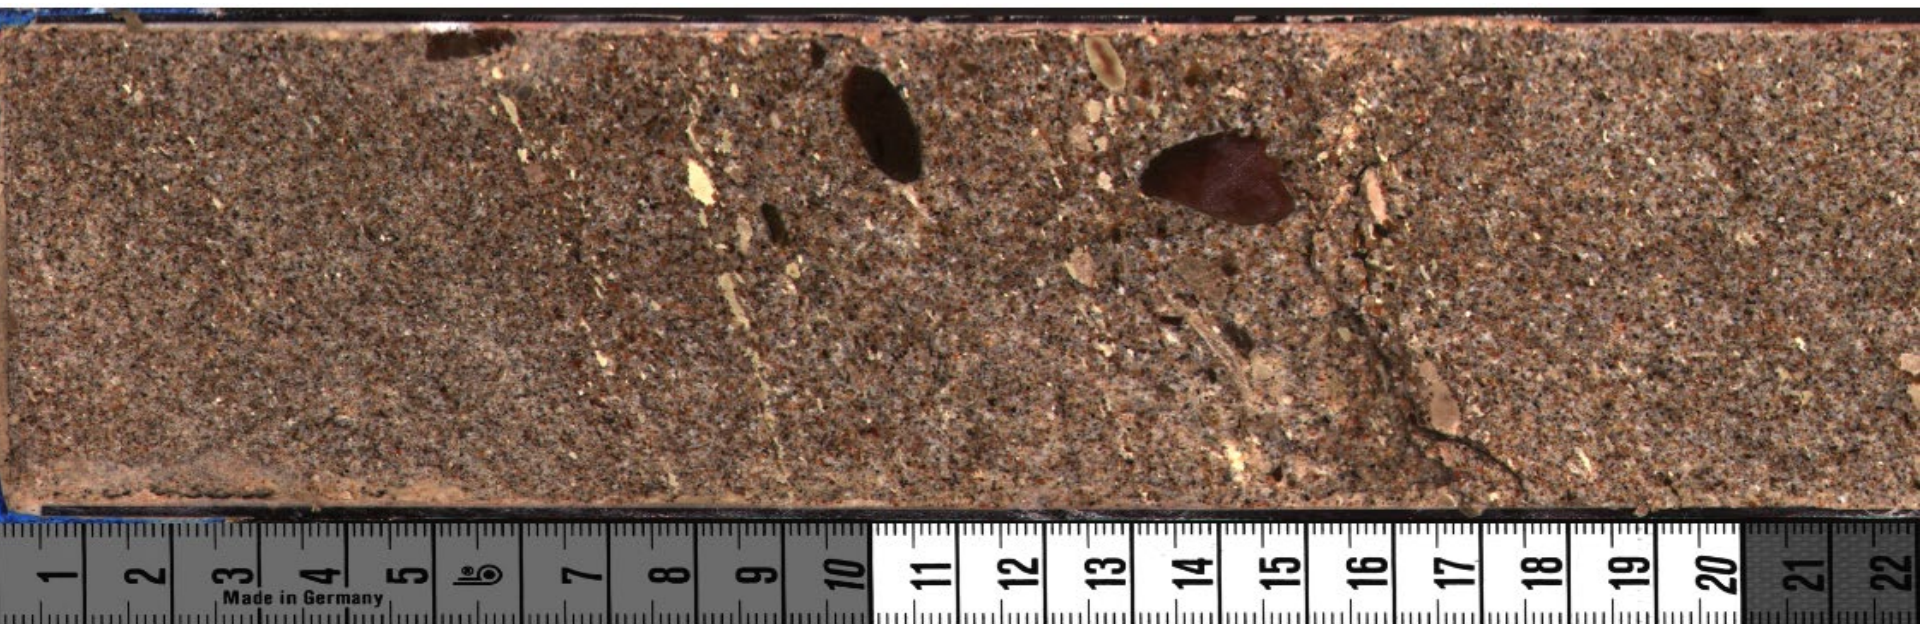



Sample 196-3

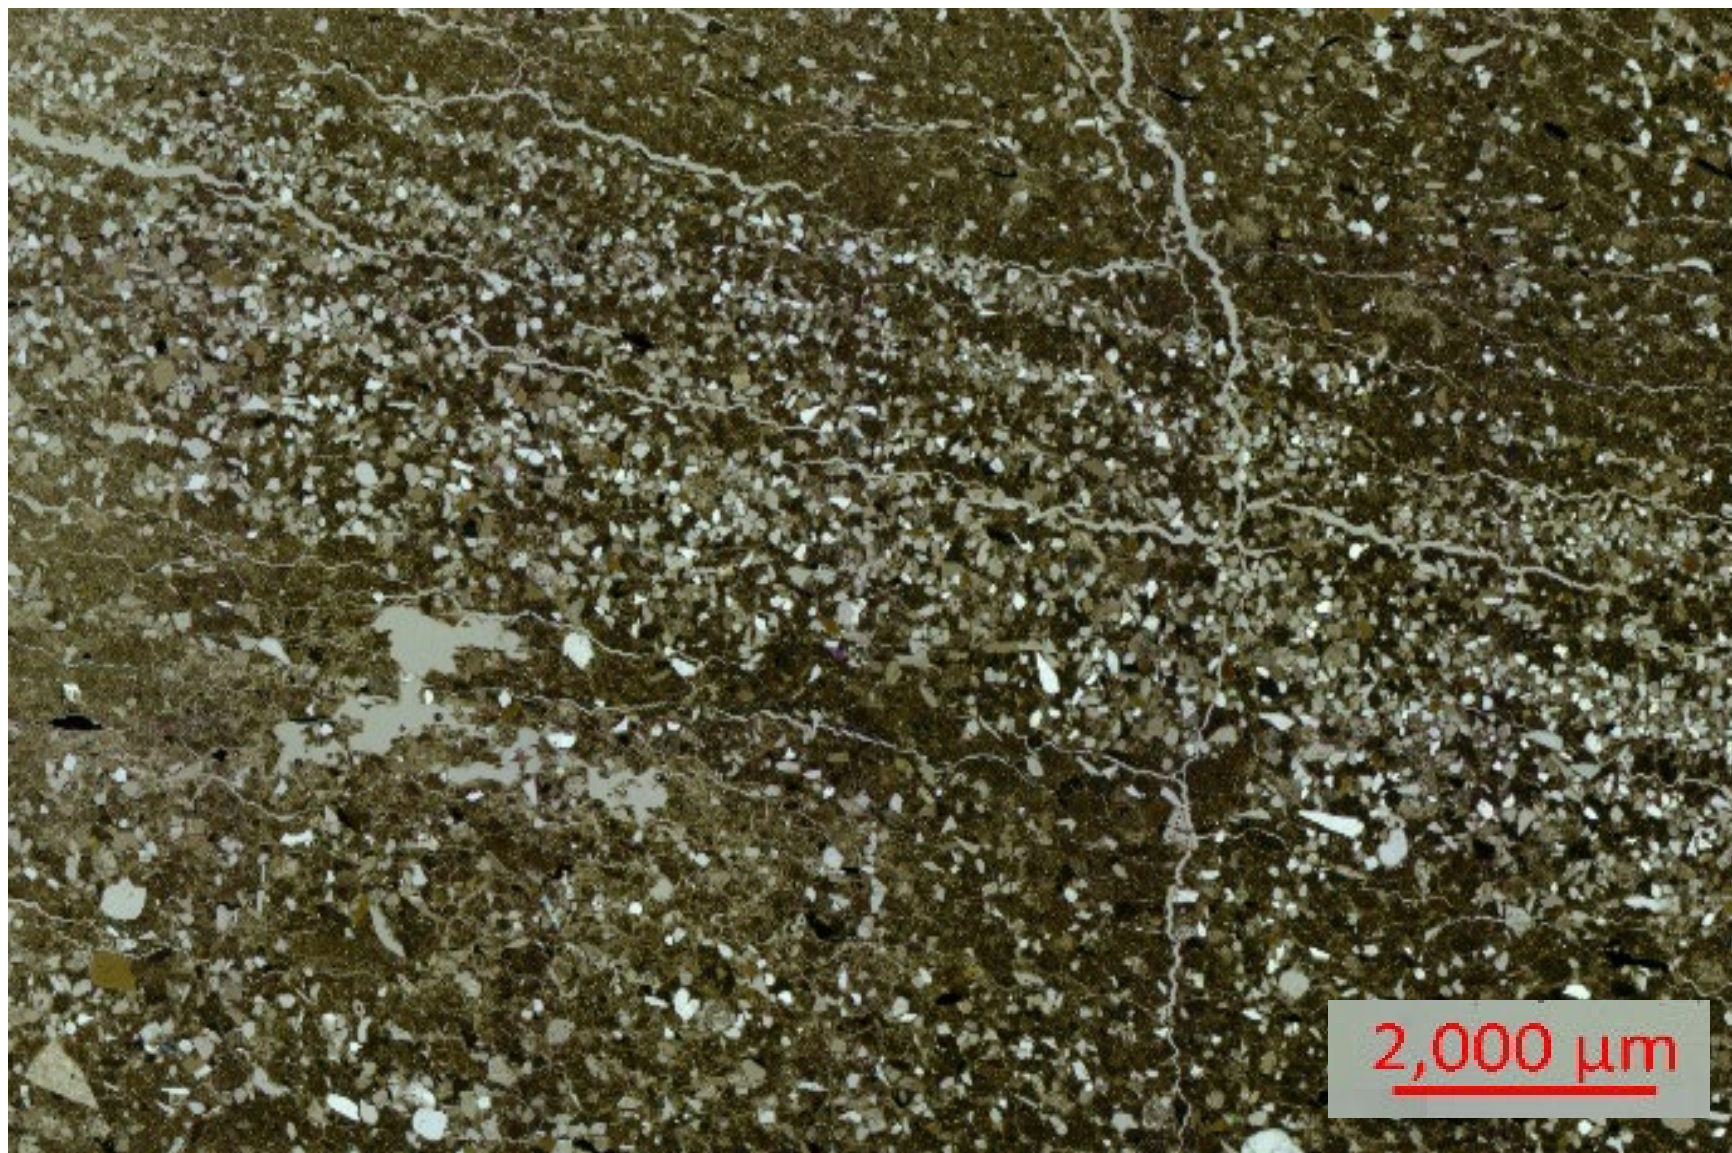



Sample 196-3

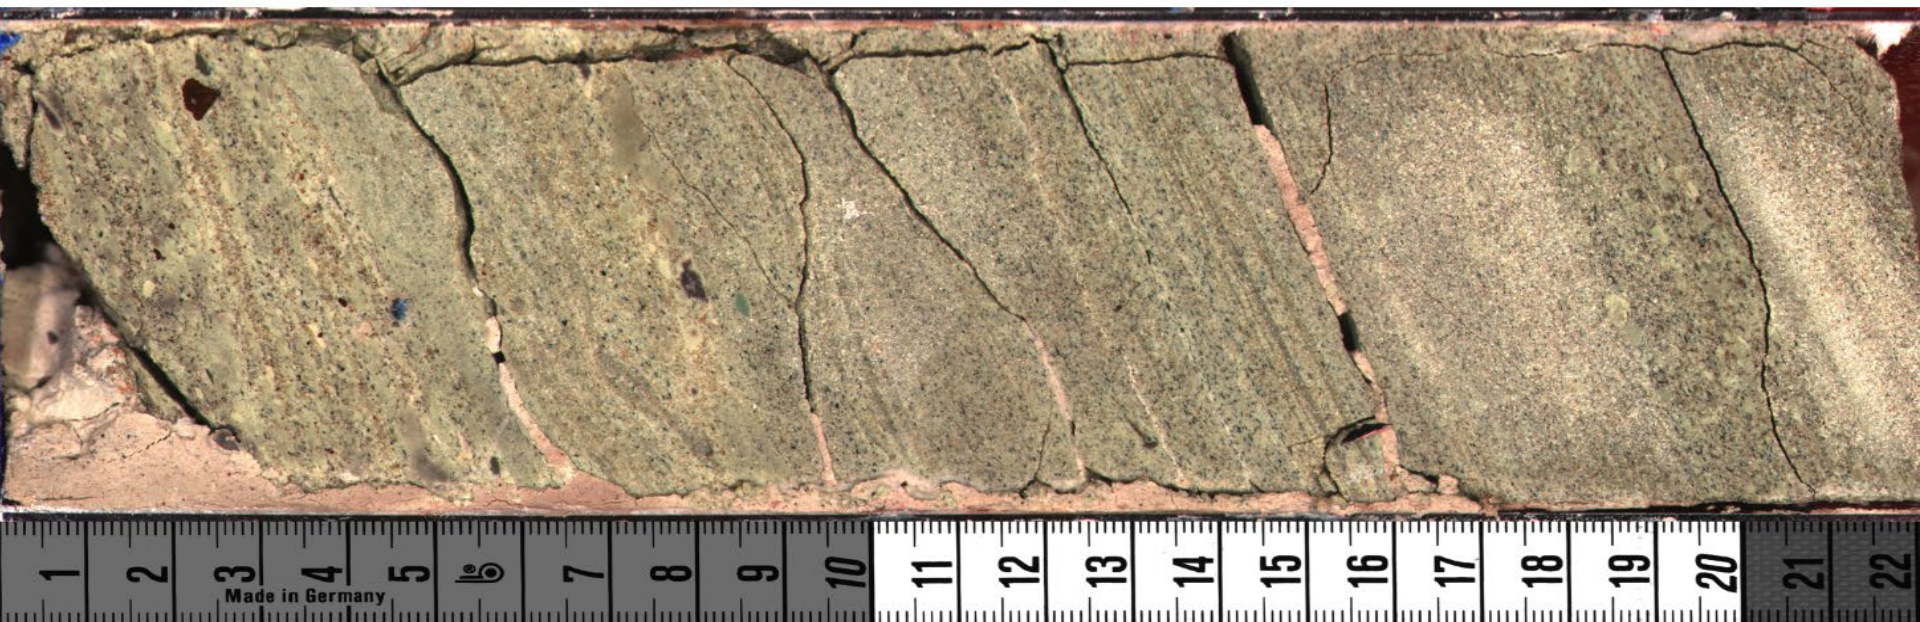



Sample 201-1

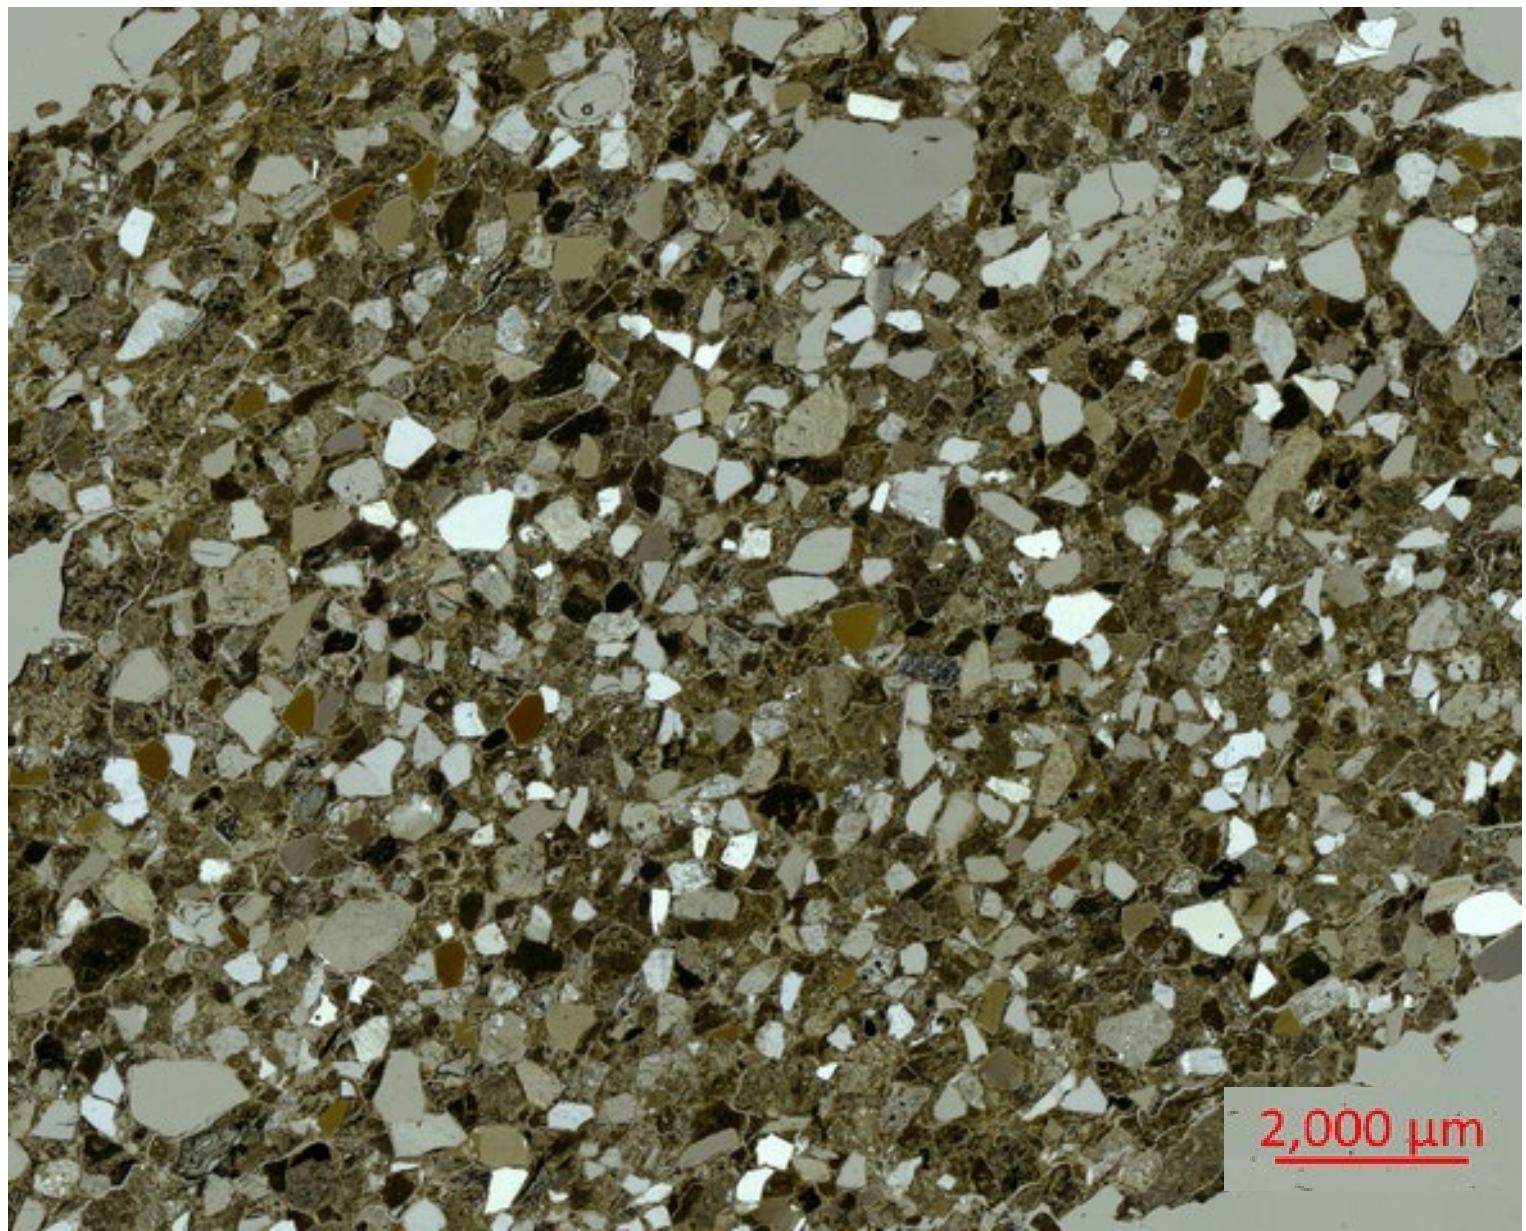



Sample 201-1

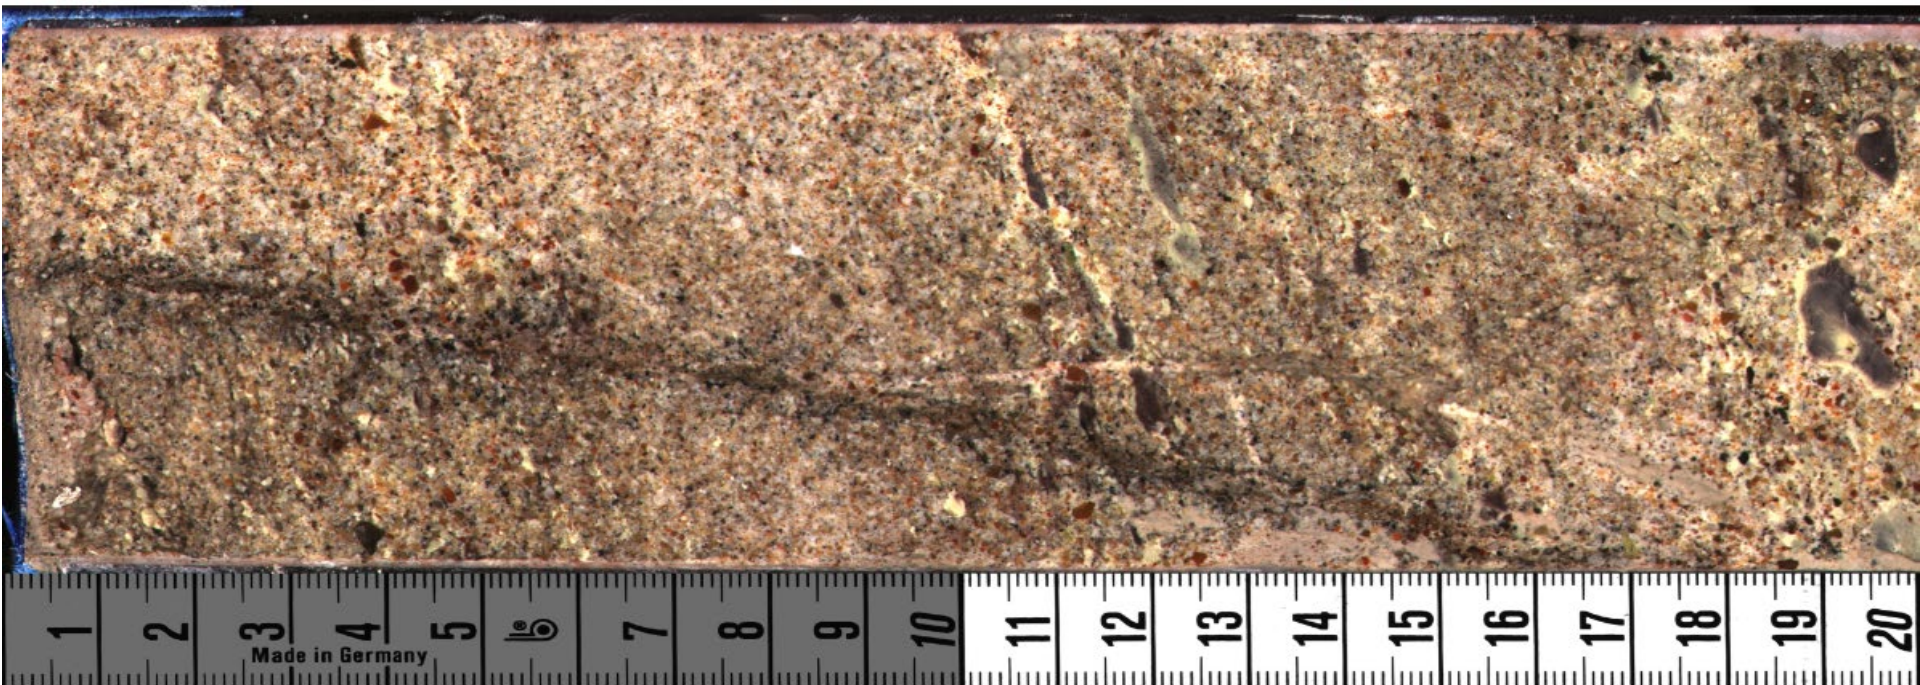



Sample 210-1  
(no thin section image available)

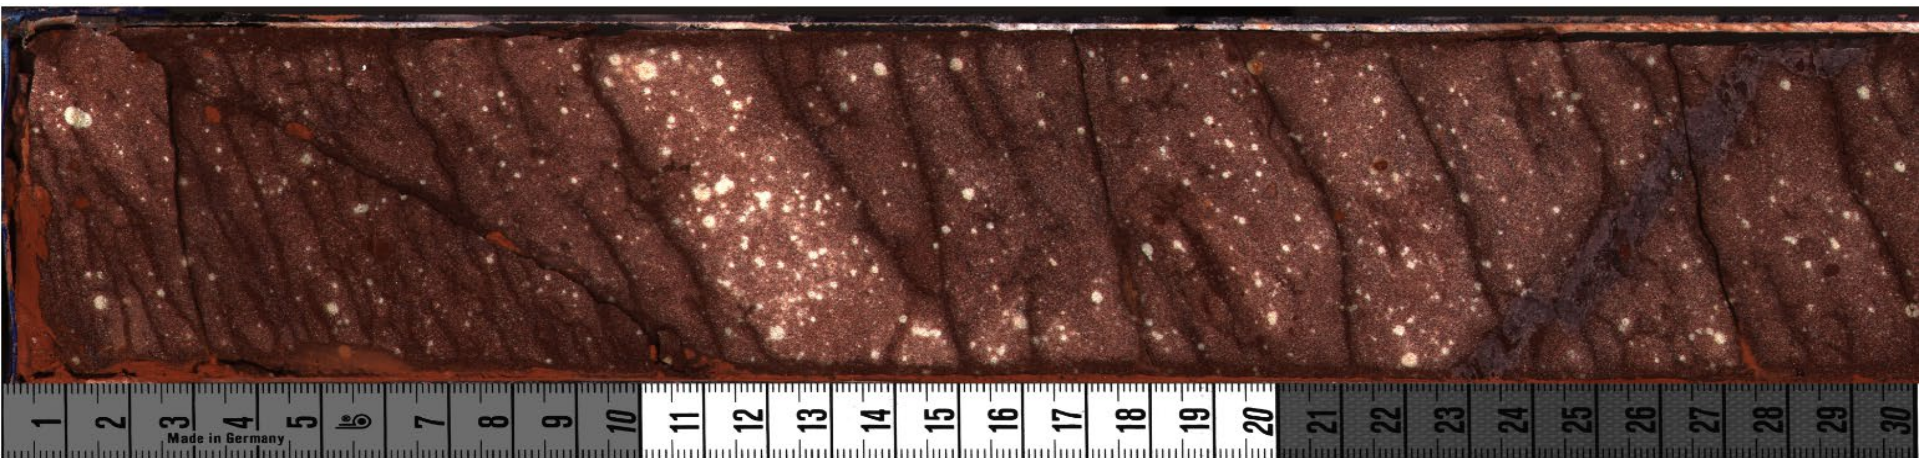



Sample 215-2

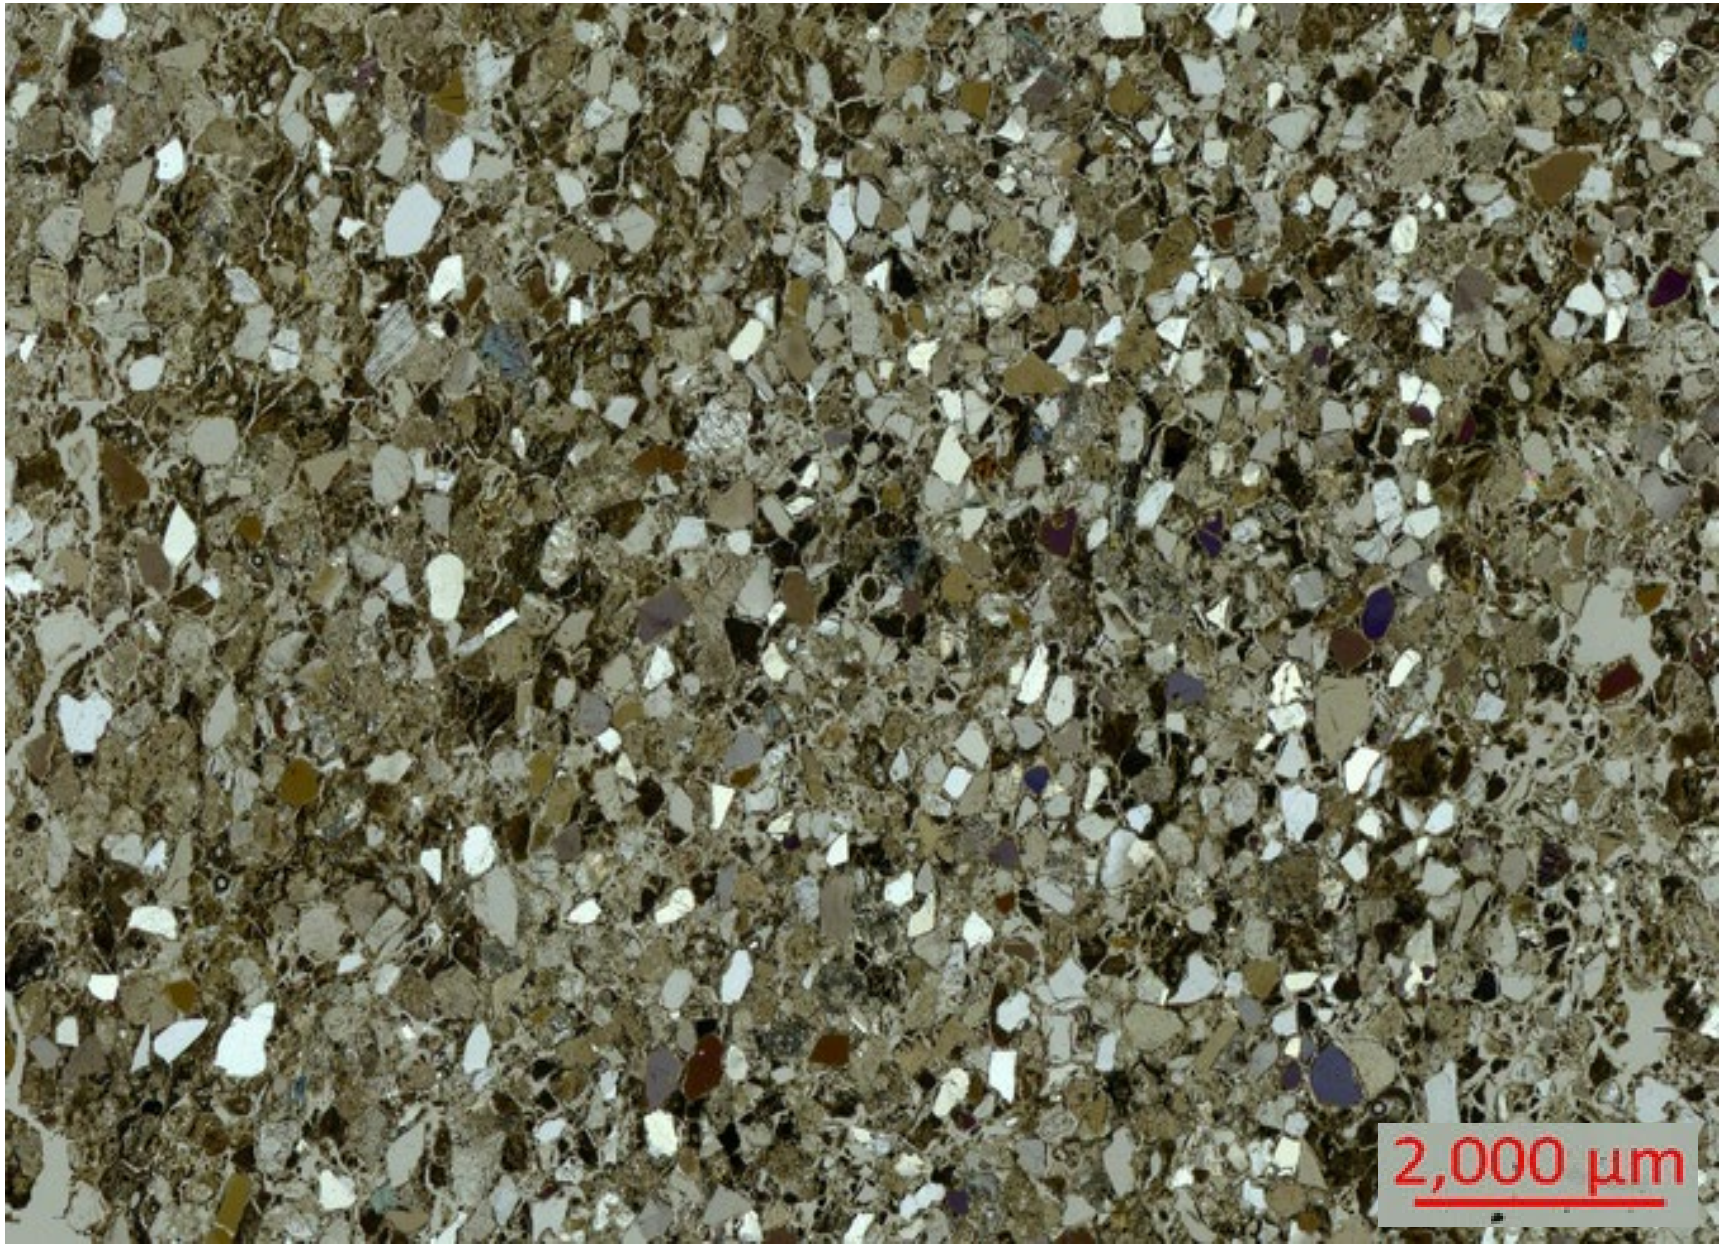



Sample 215-2

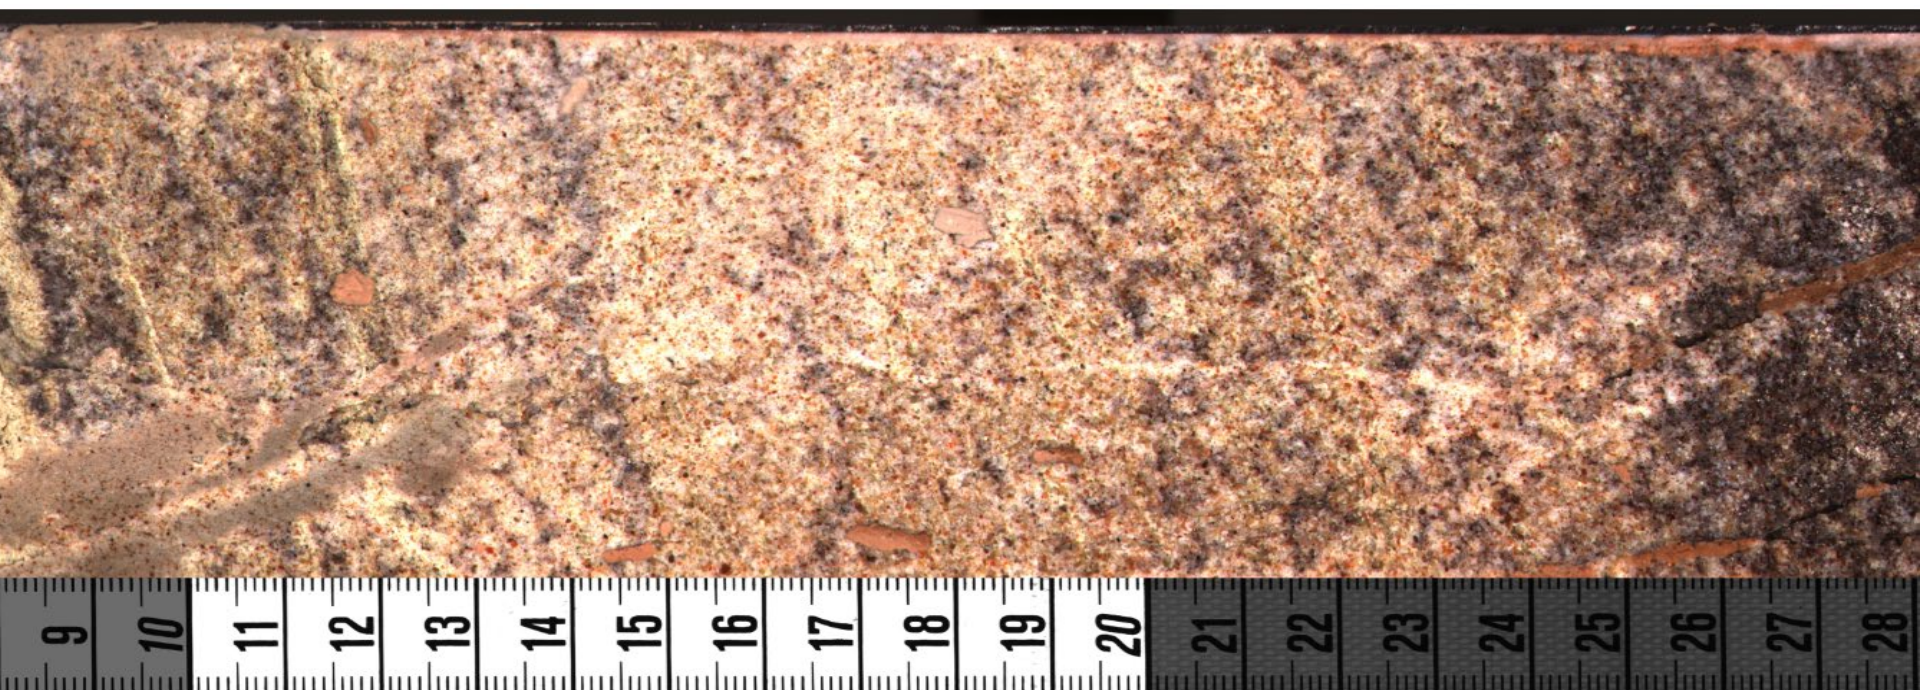



Sample 227-3

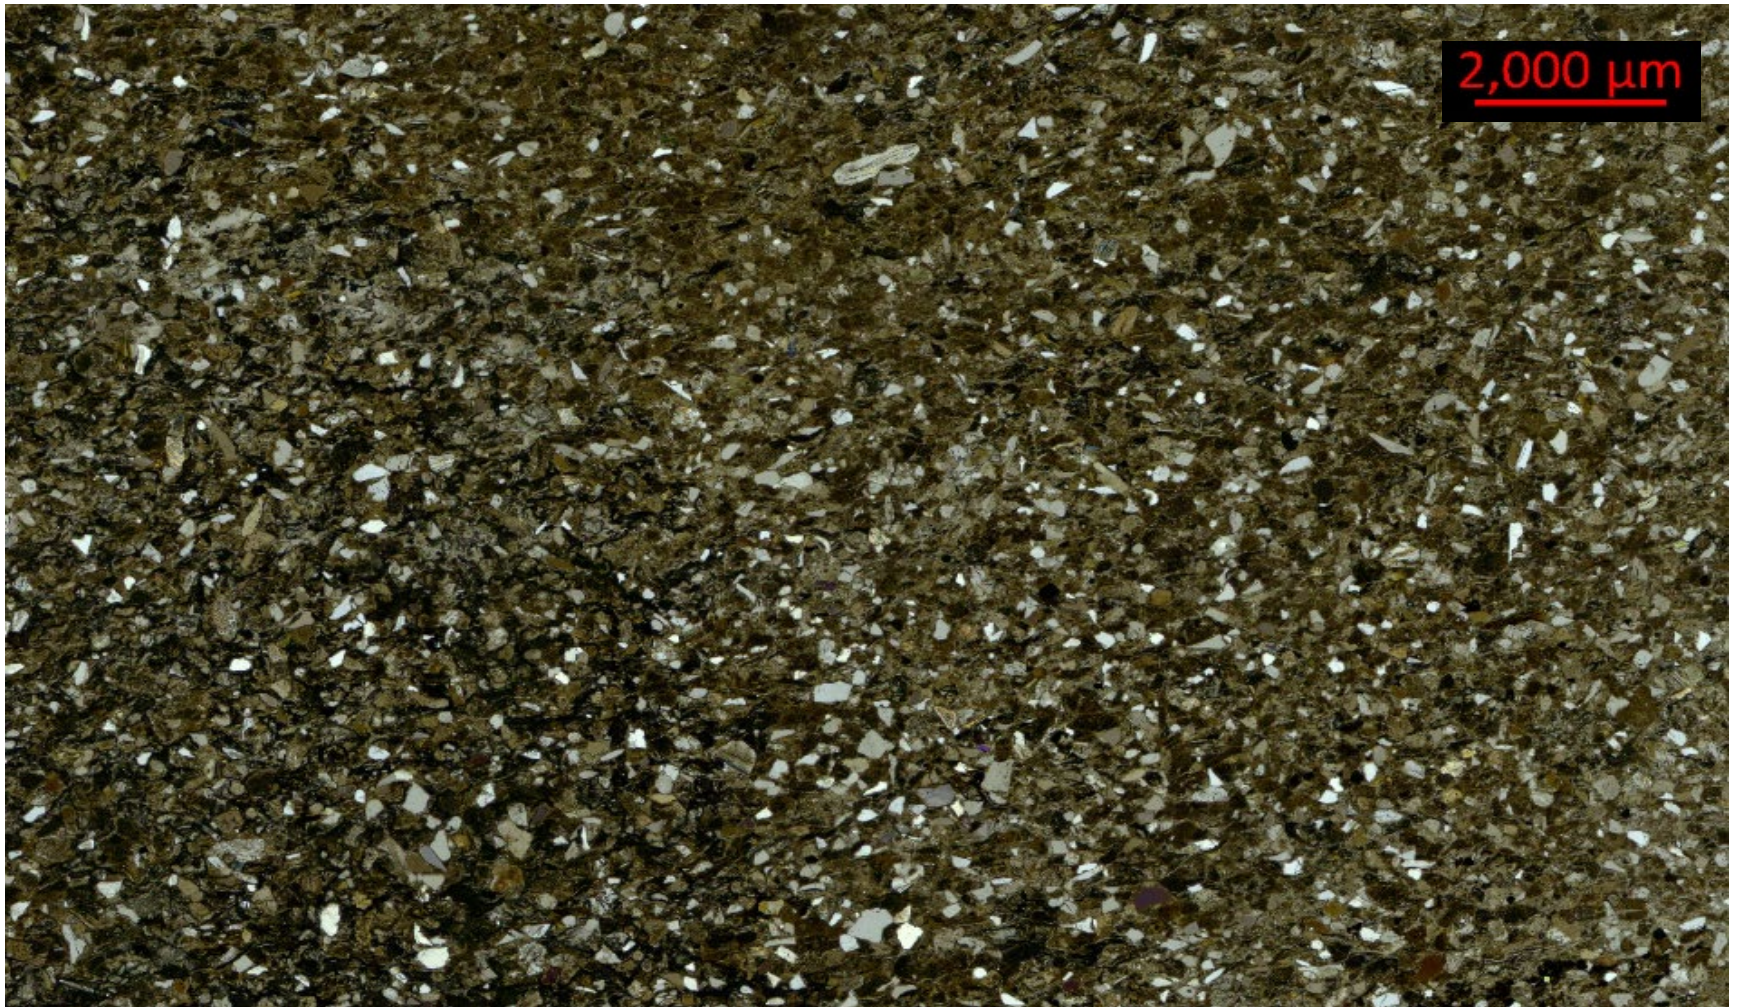



Sample 227-3

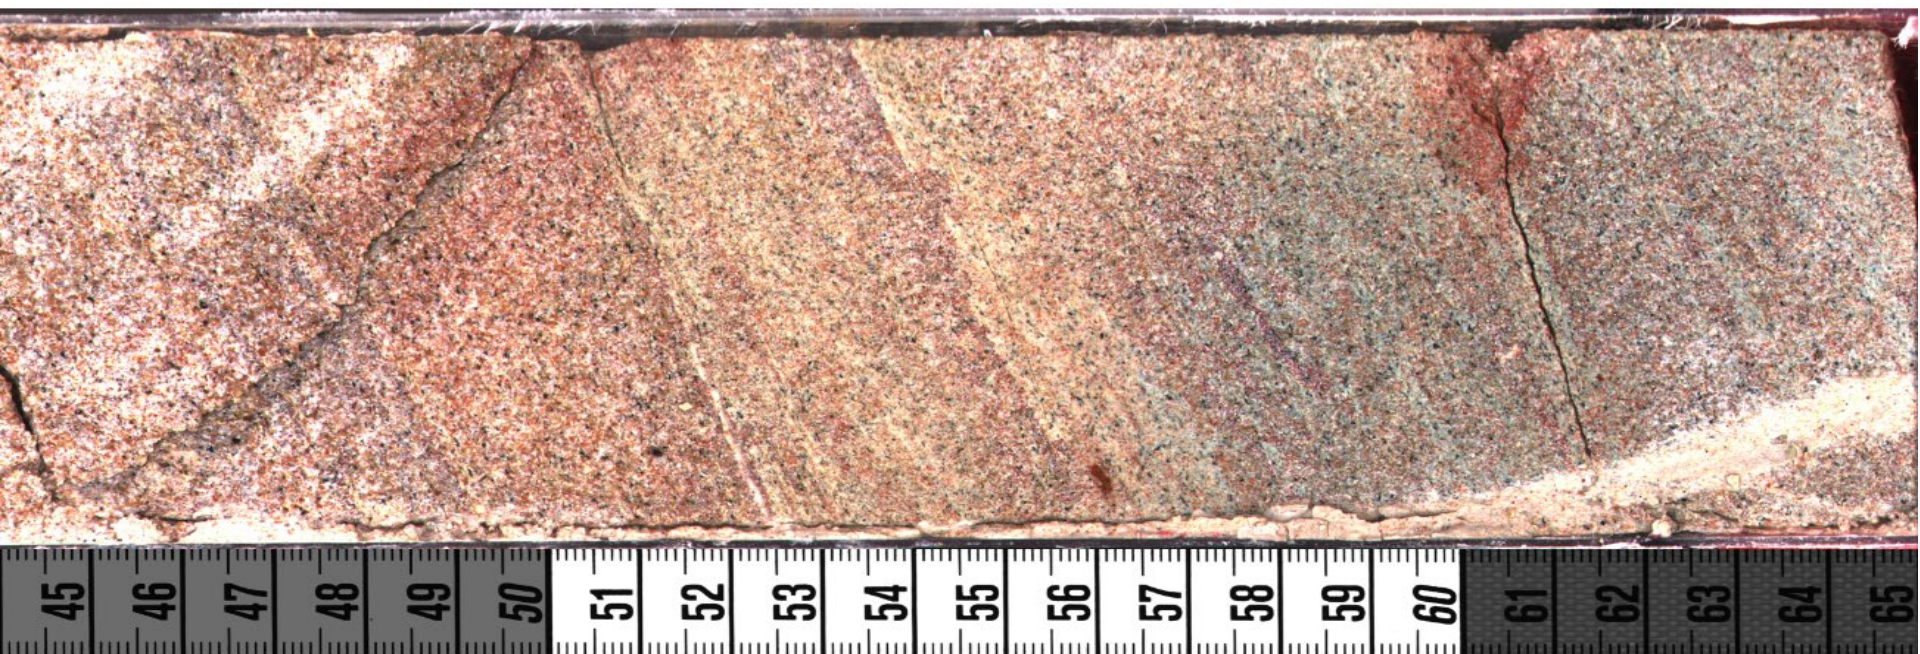



Sample 243-3  
(no thin section image available)

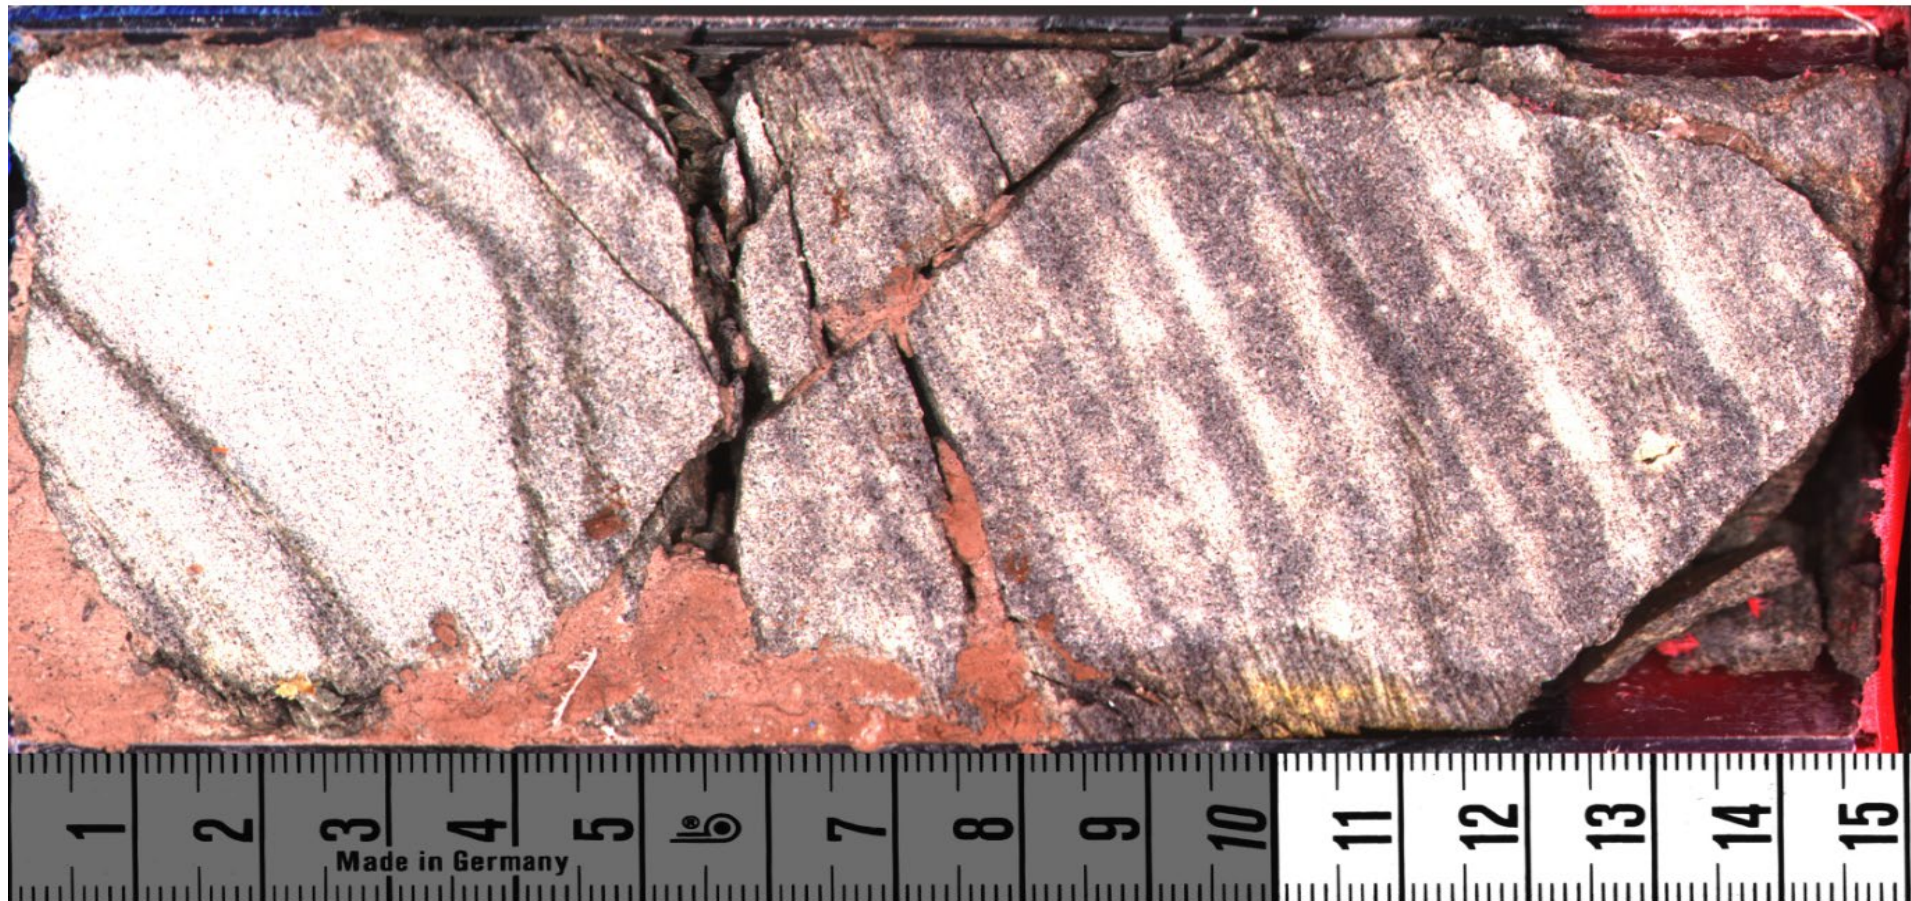



Sample 261-1  
(no thin section image available)

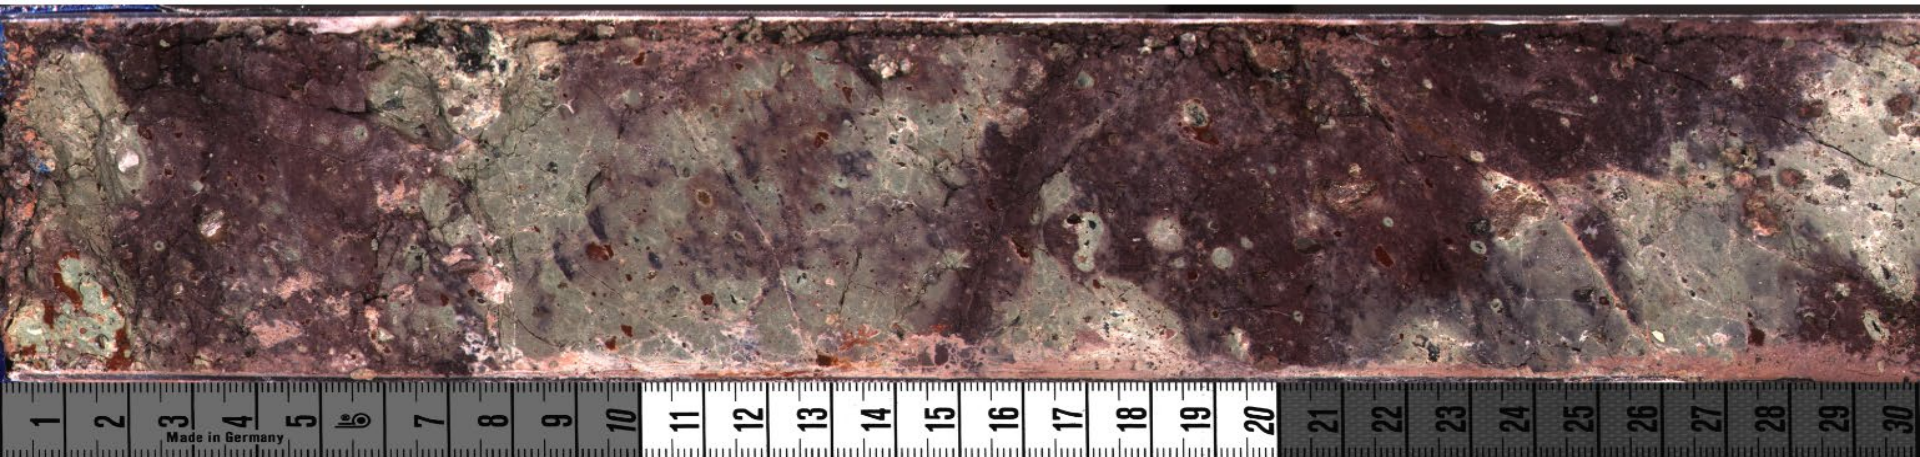



Sample 287-2

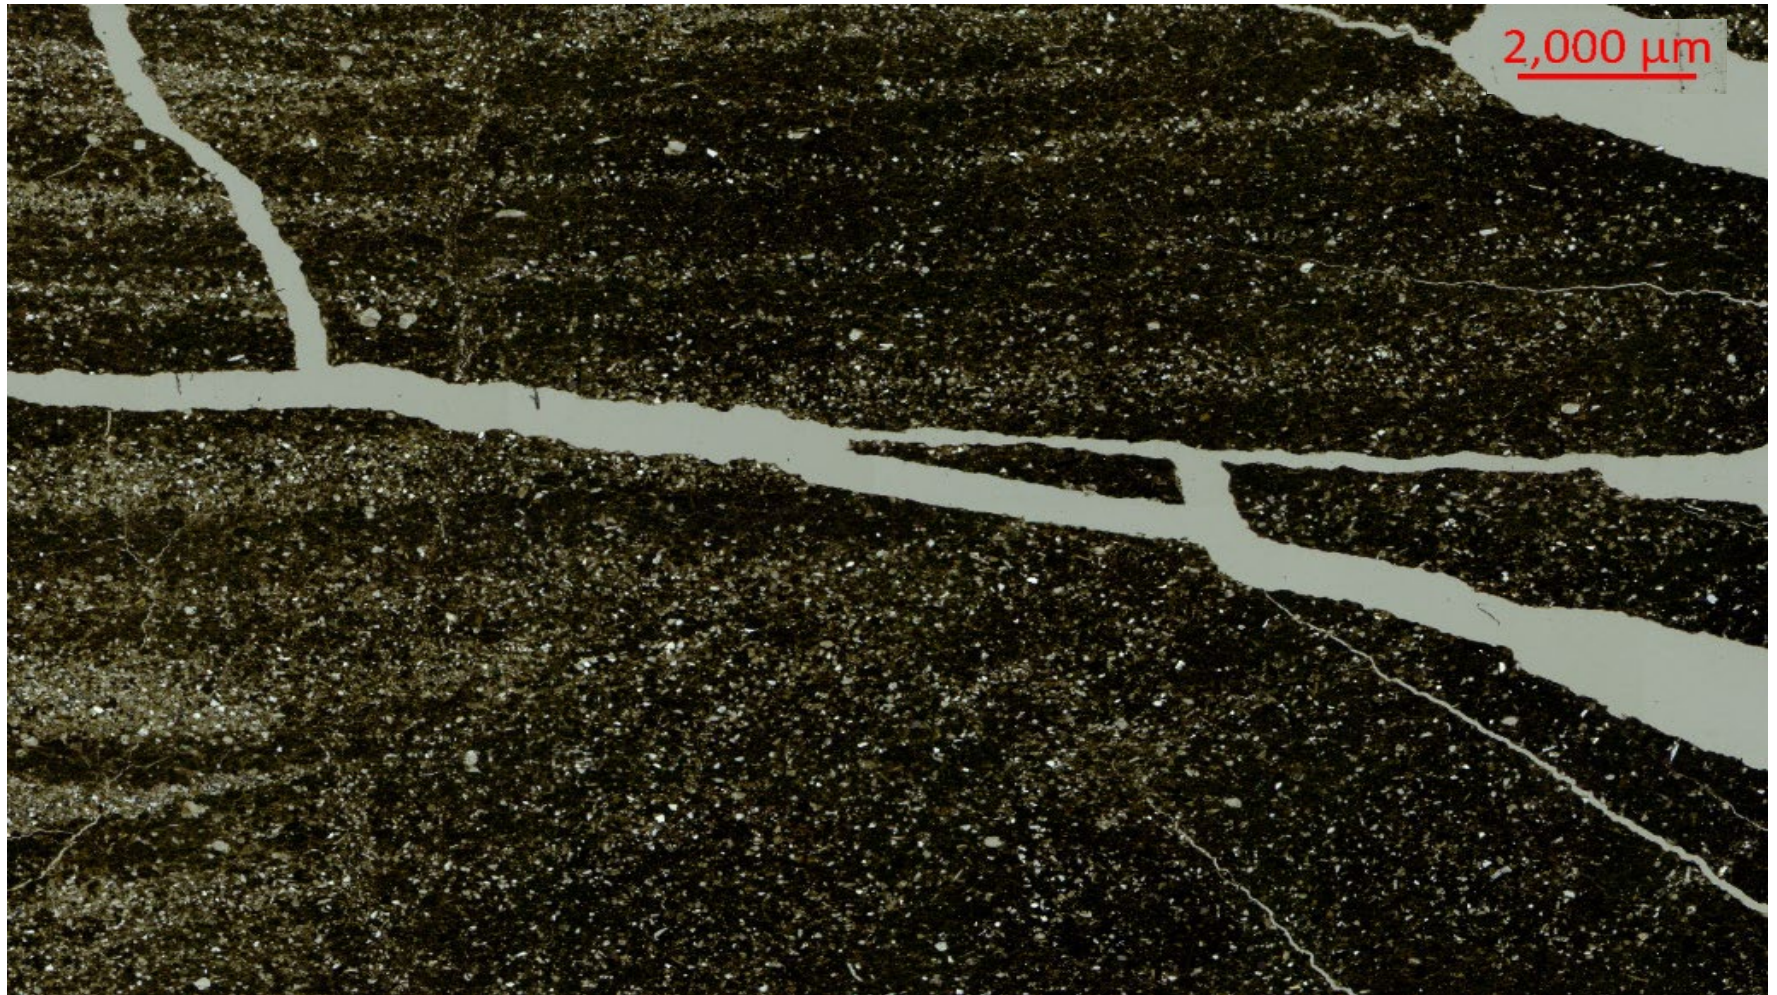



Sample 287-2

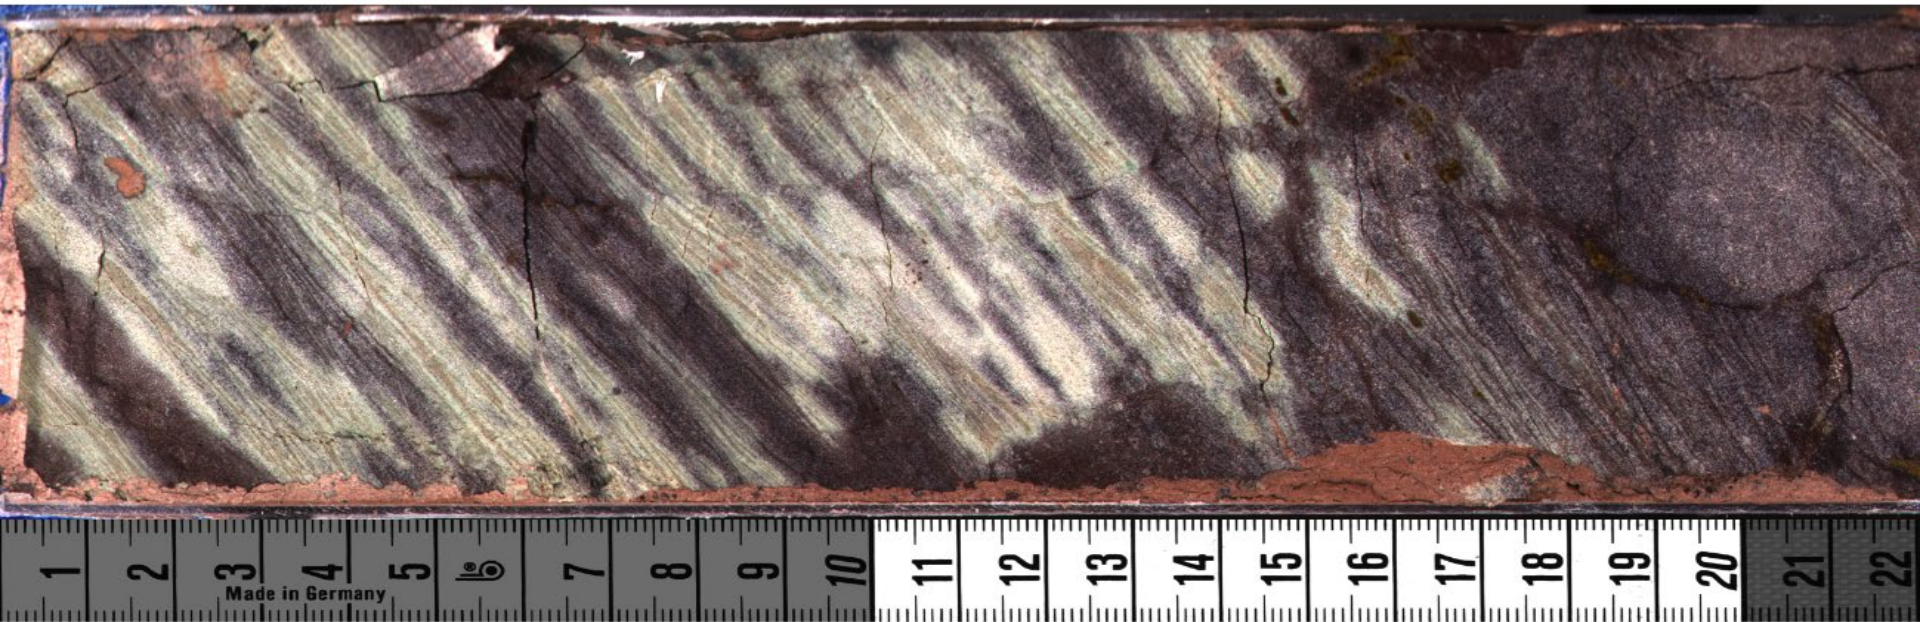



Sample 297-2

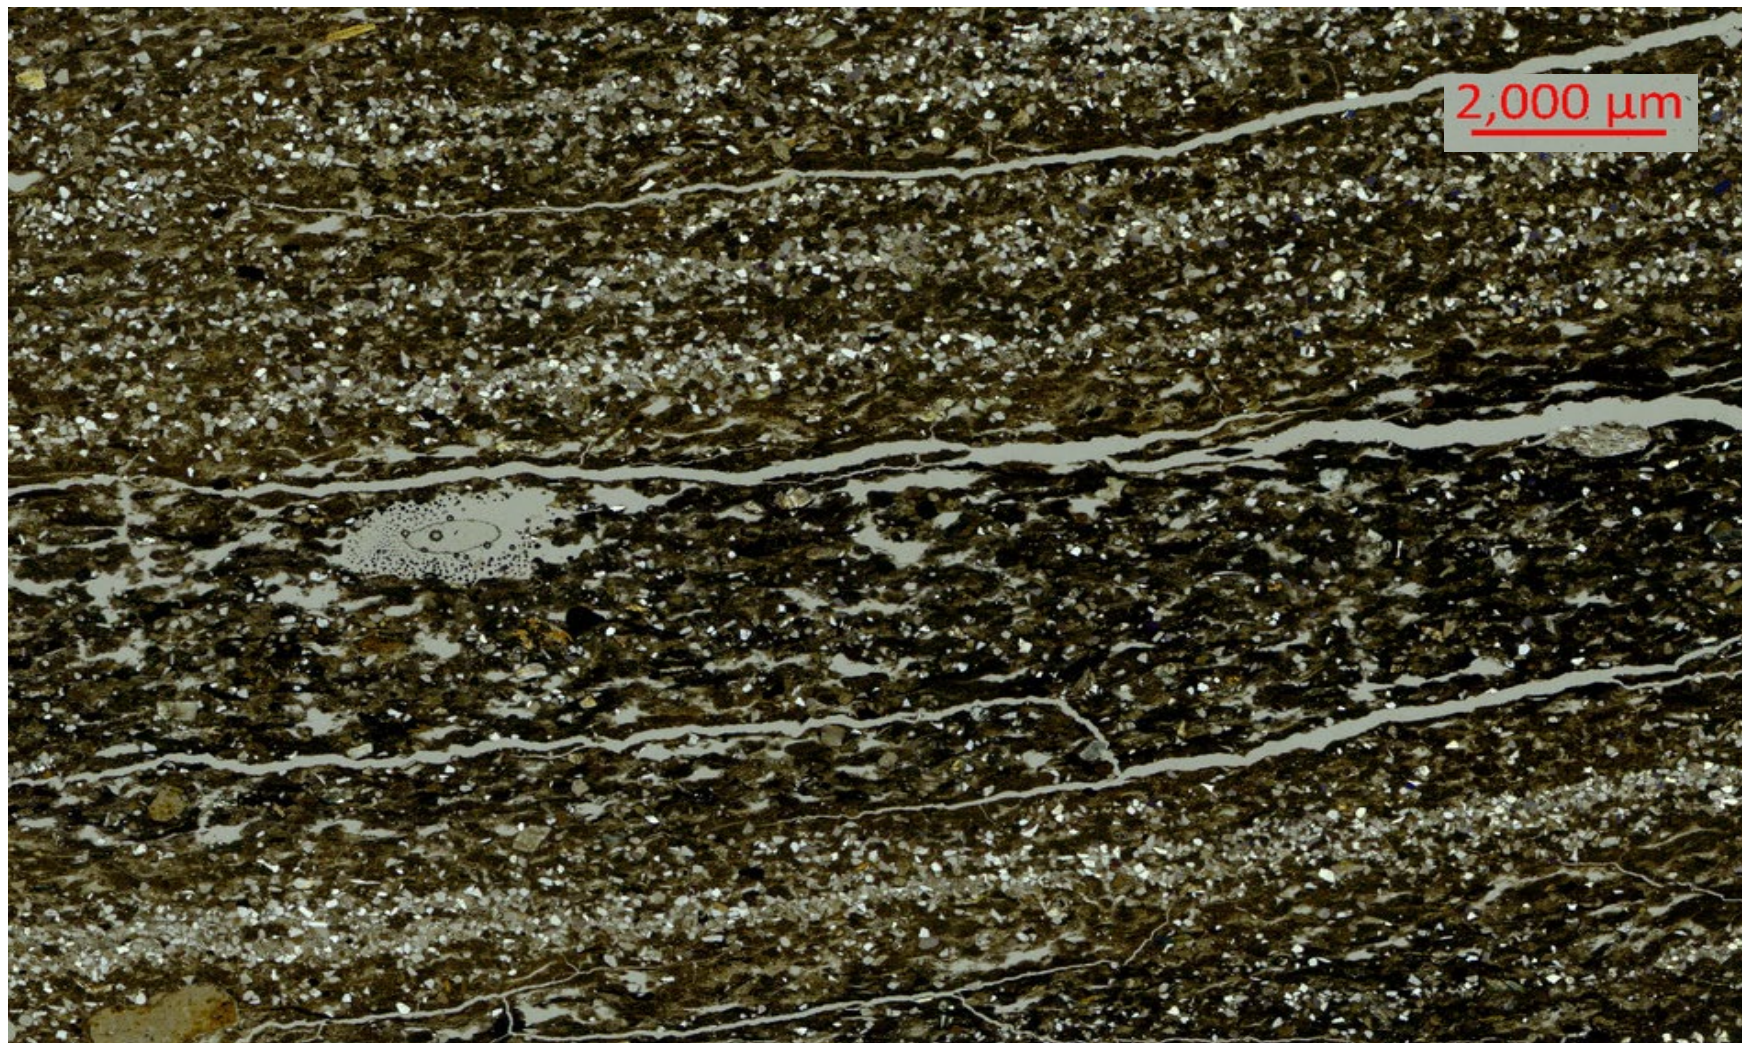



Sample 297-2

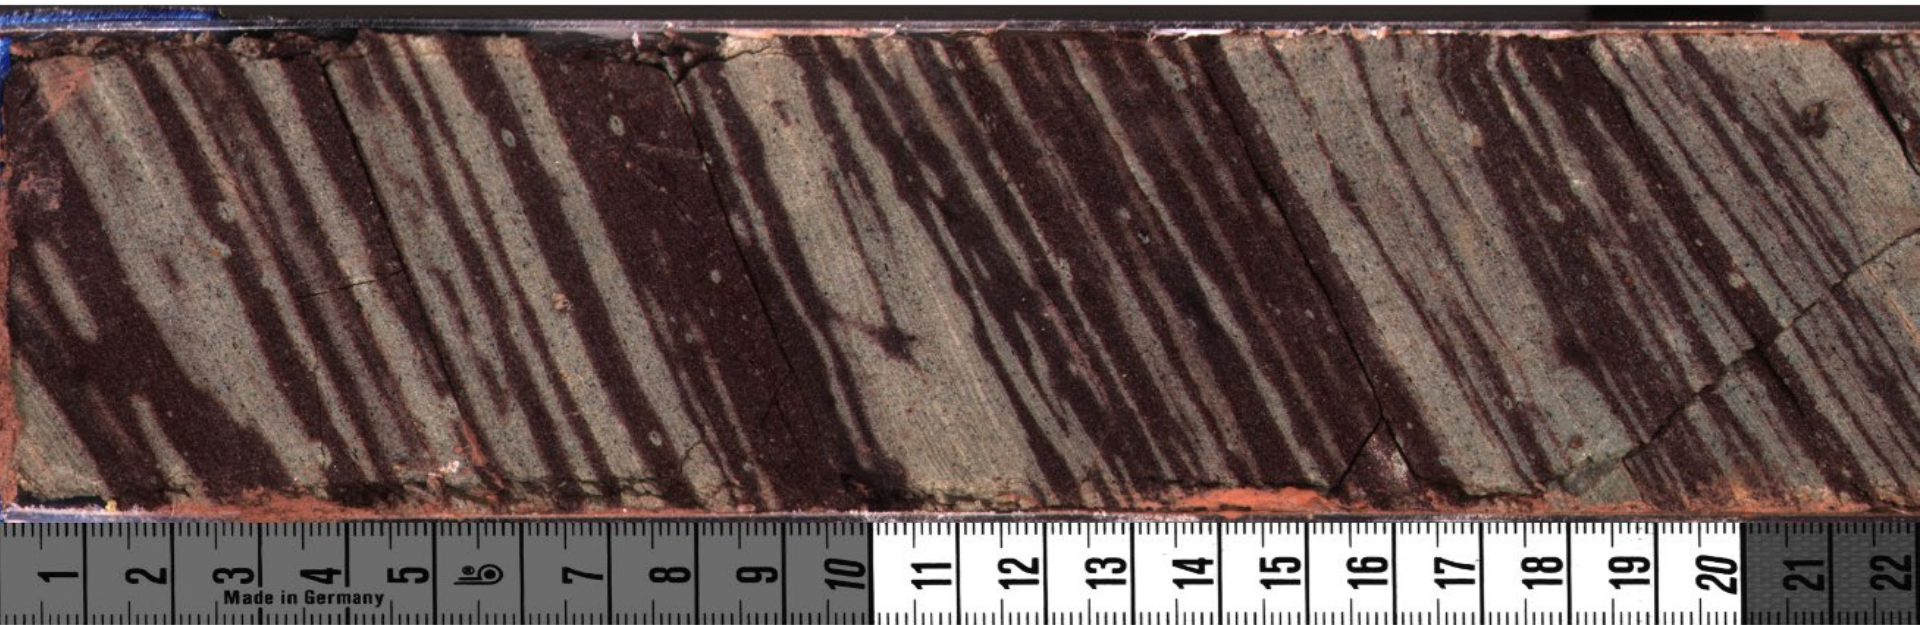



Sample 305-2

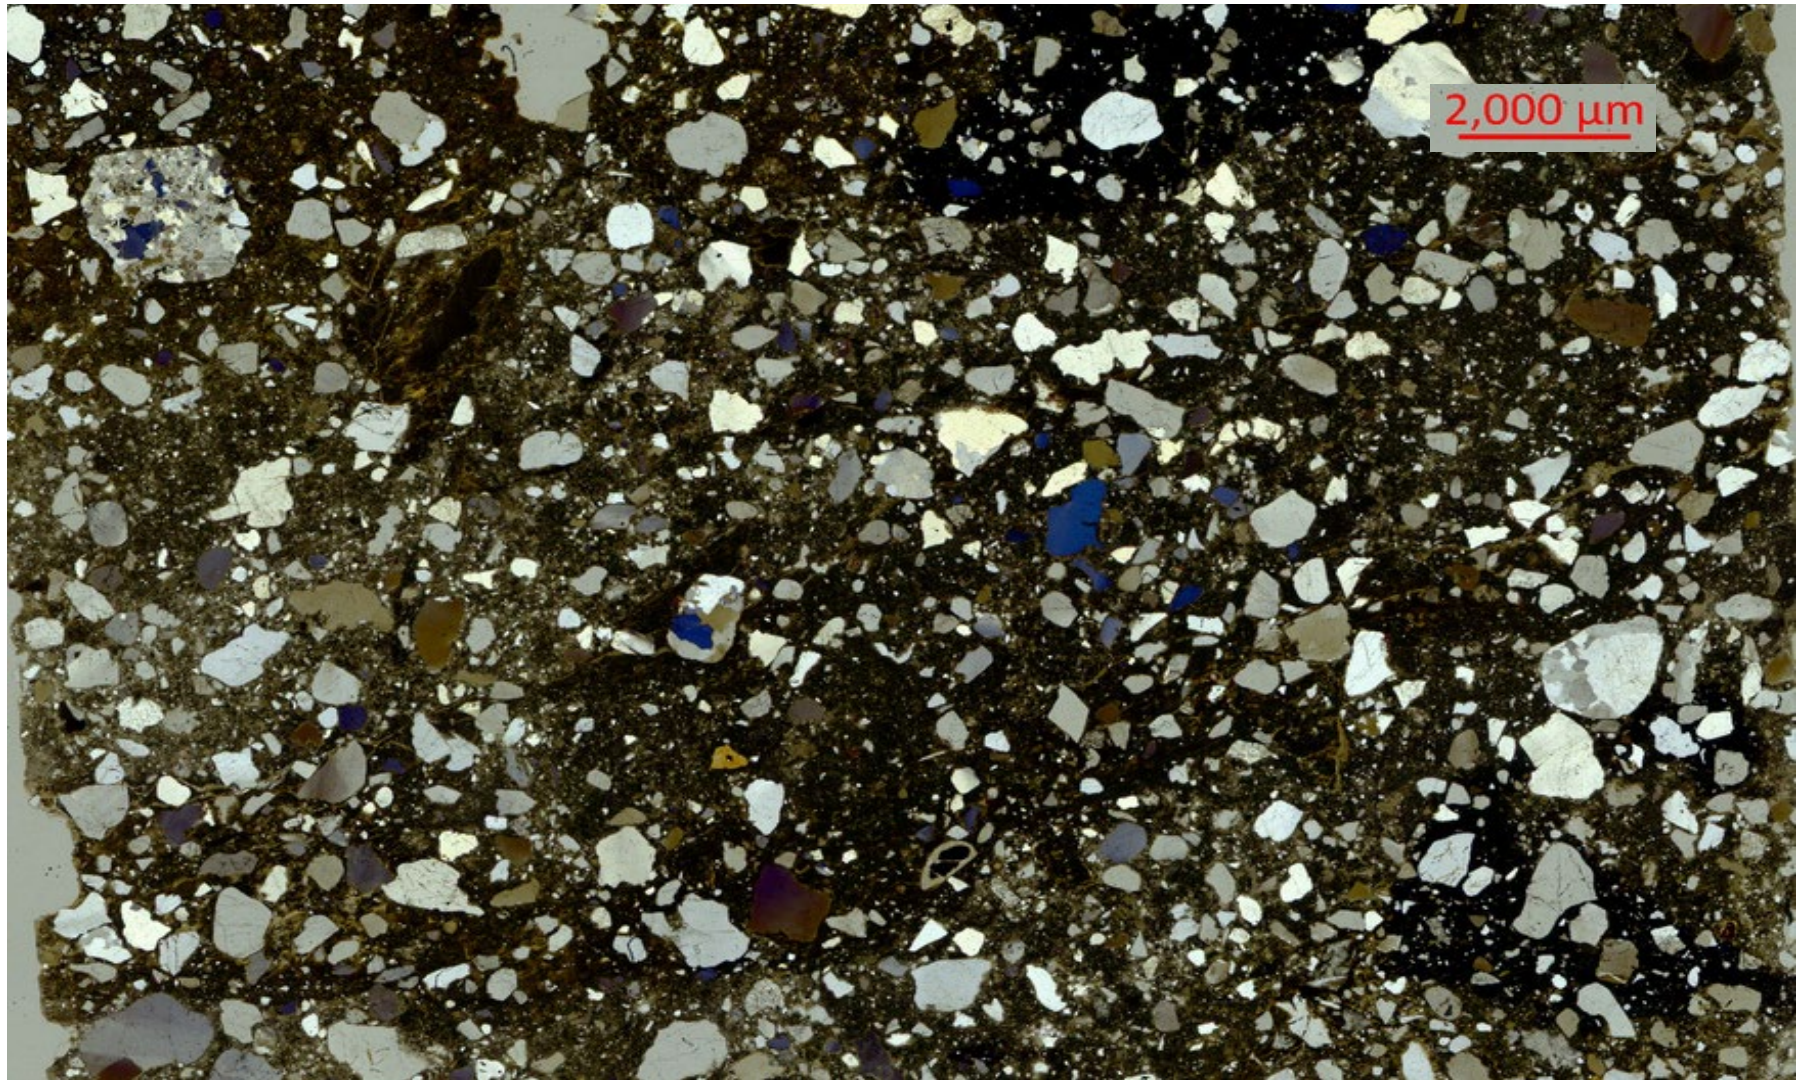



Sample 305-2

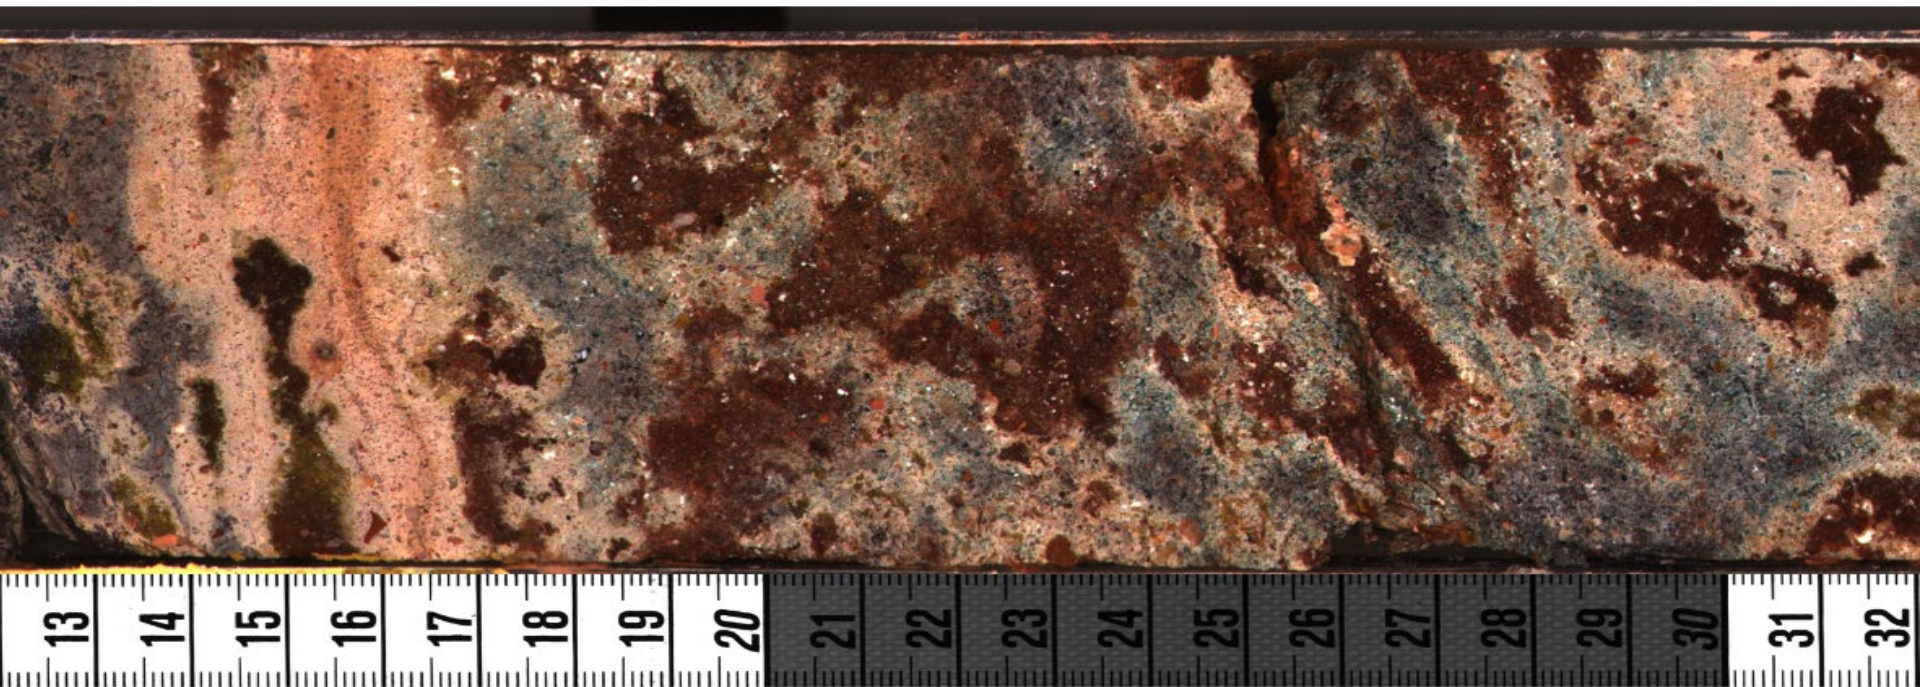



Sample 319-2

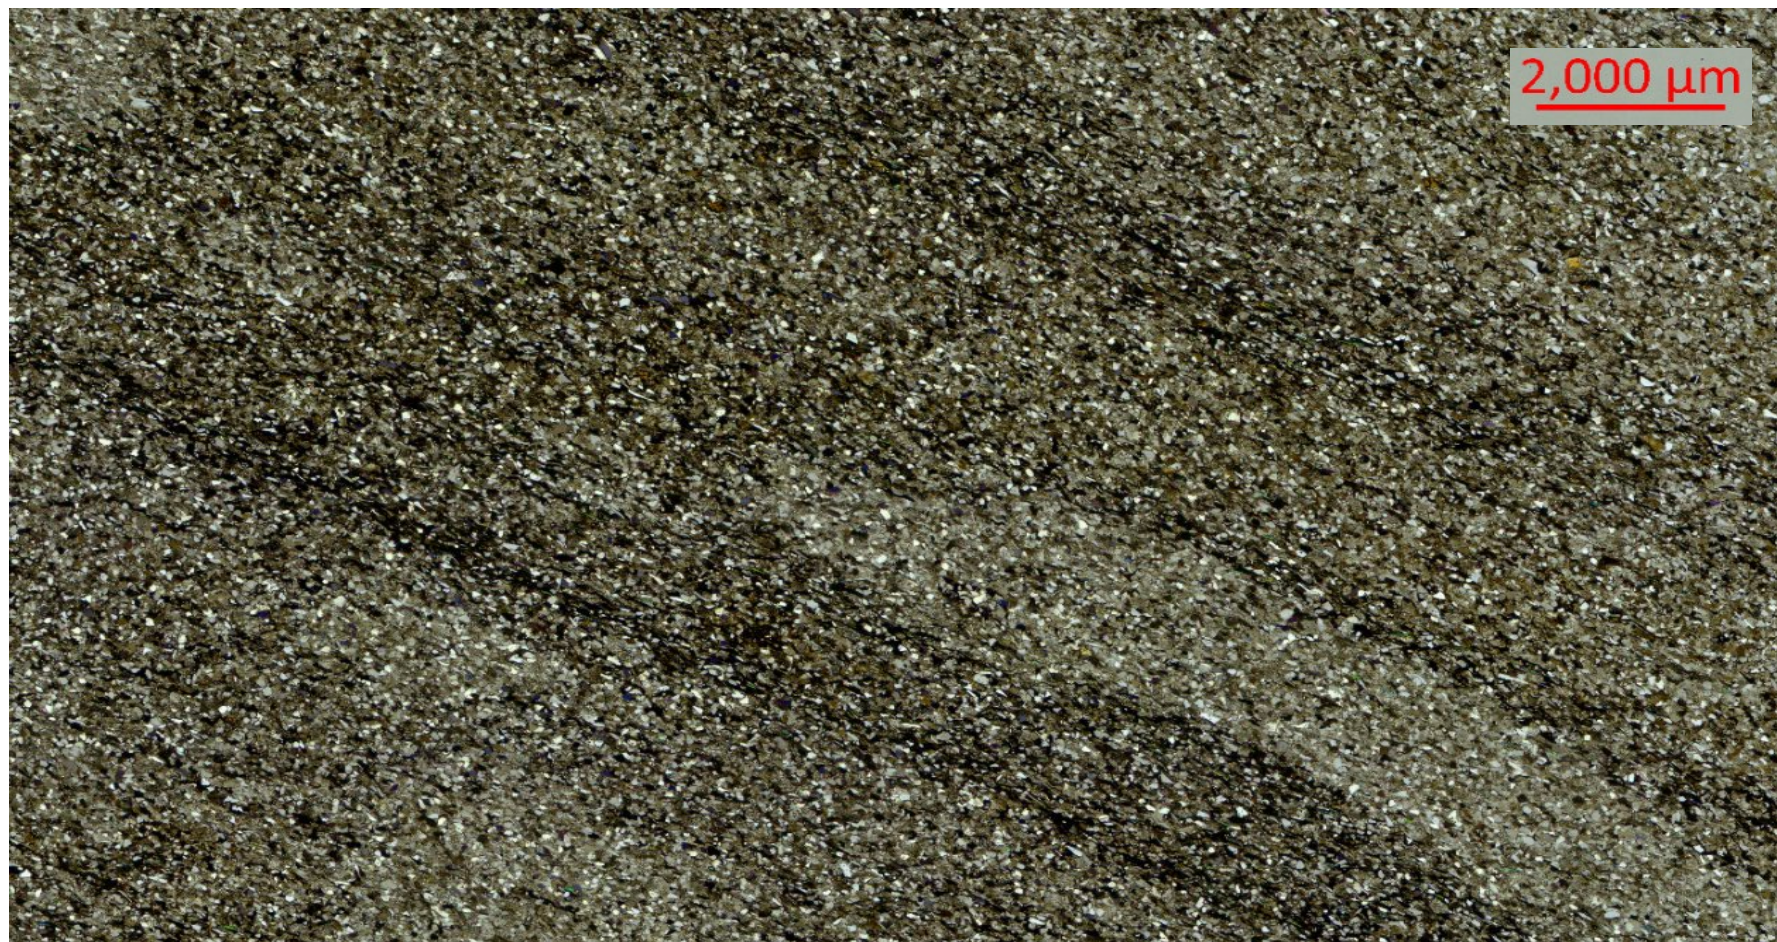



Sample 319-2

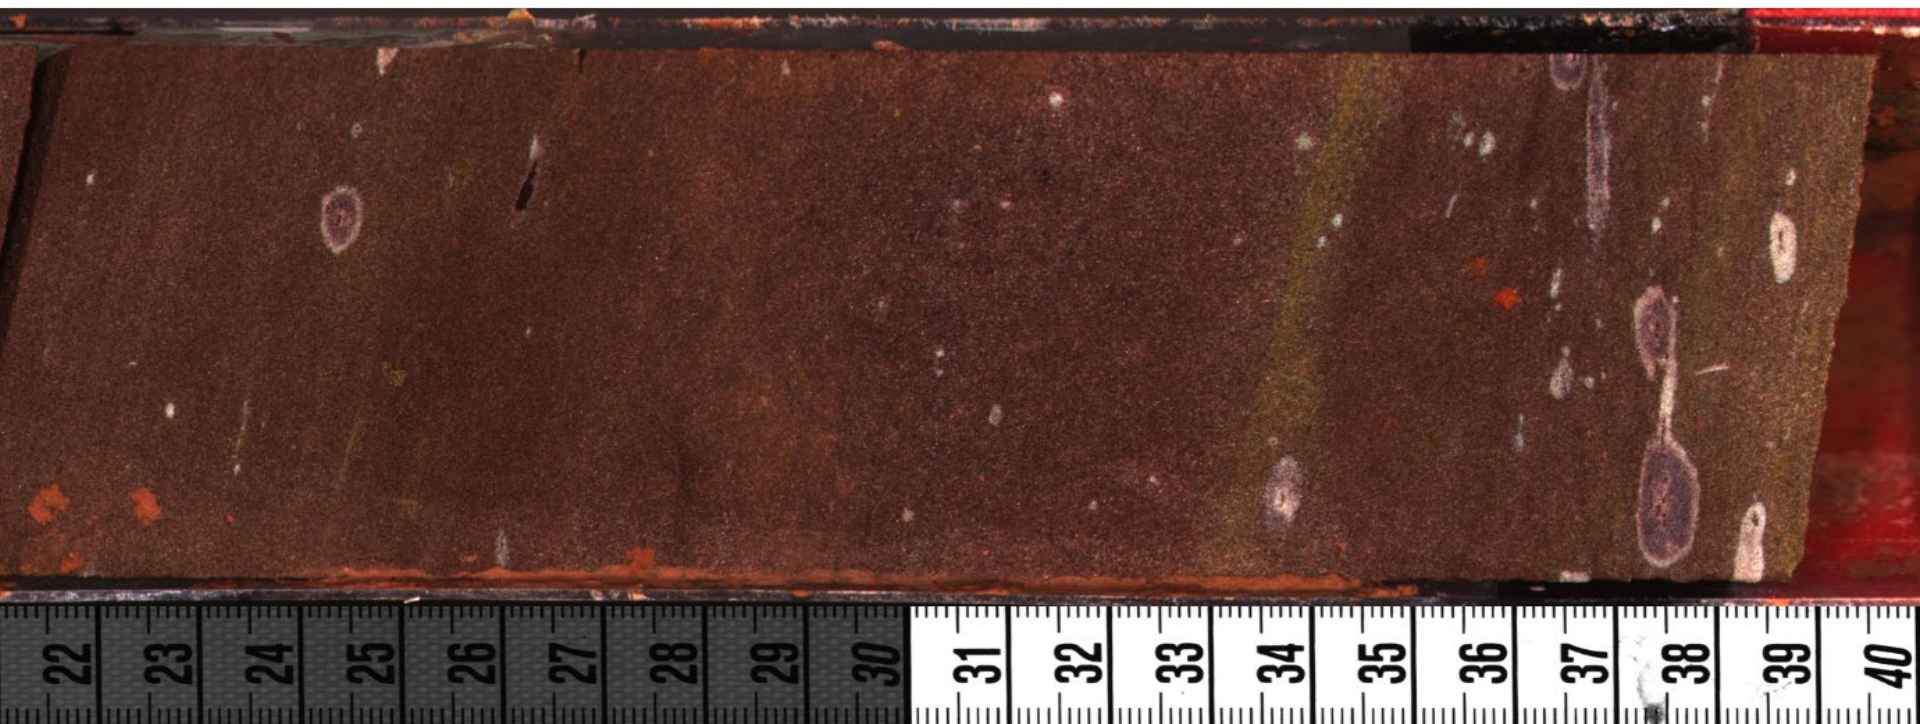



Sample 327-2  
(no thin section image available)

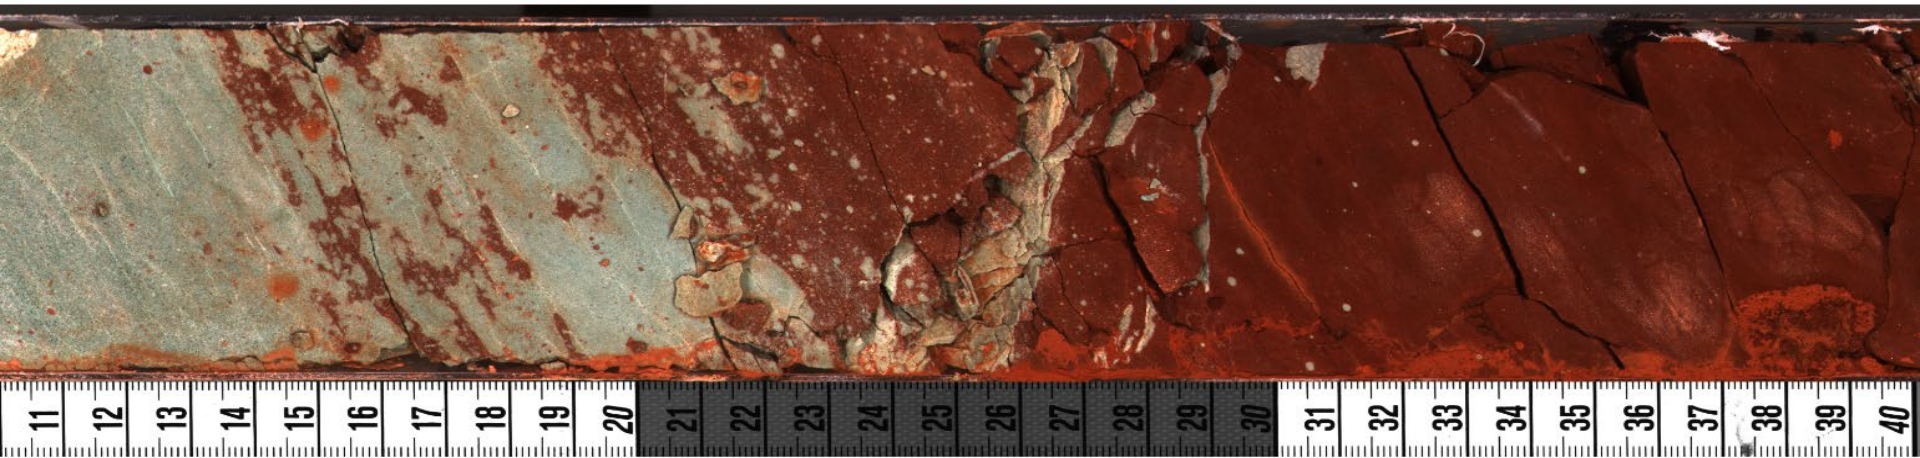



Sample 335-1

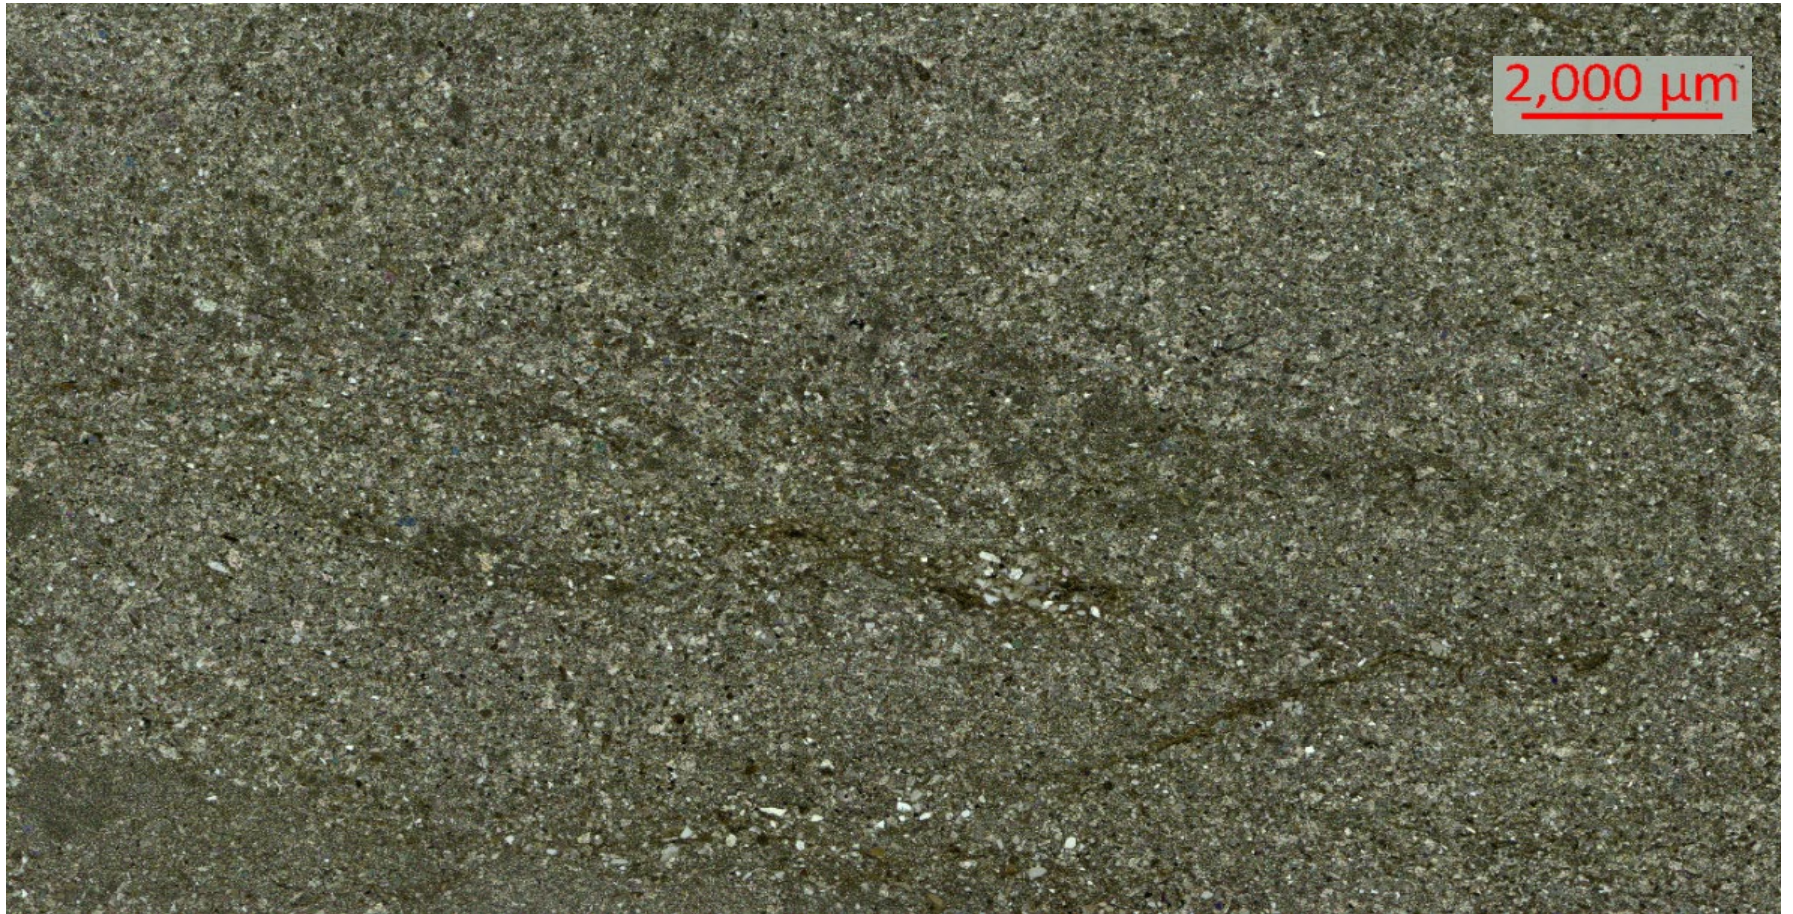



Sample 335-1

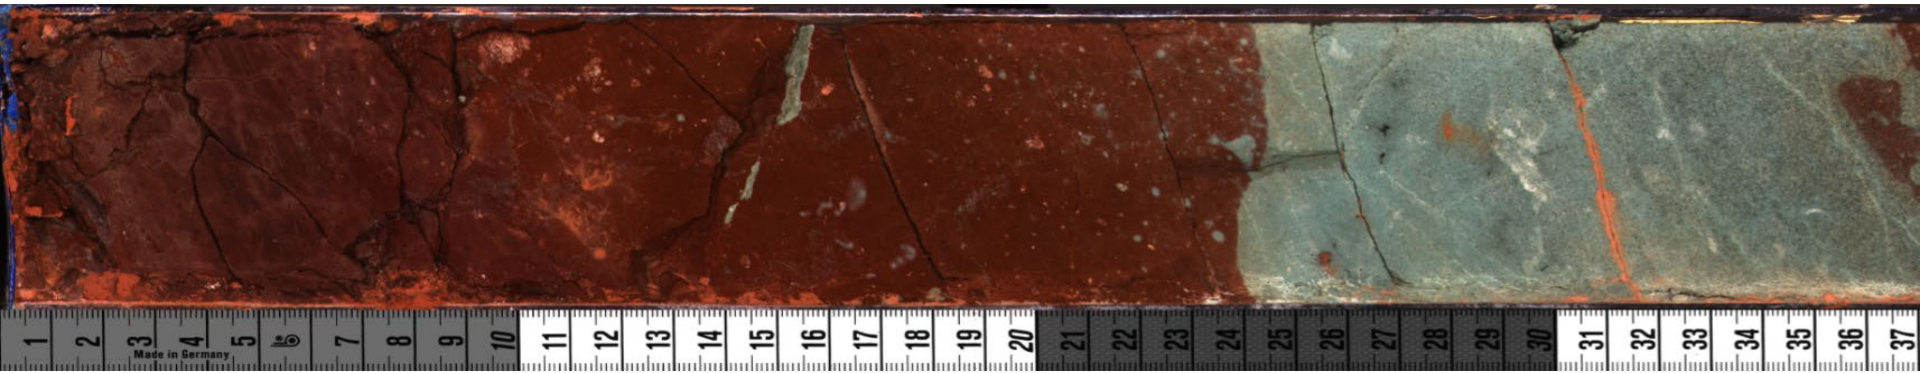



Sample 349-3

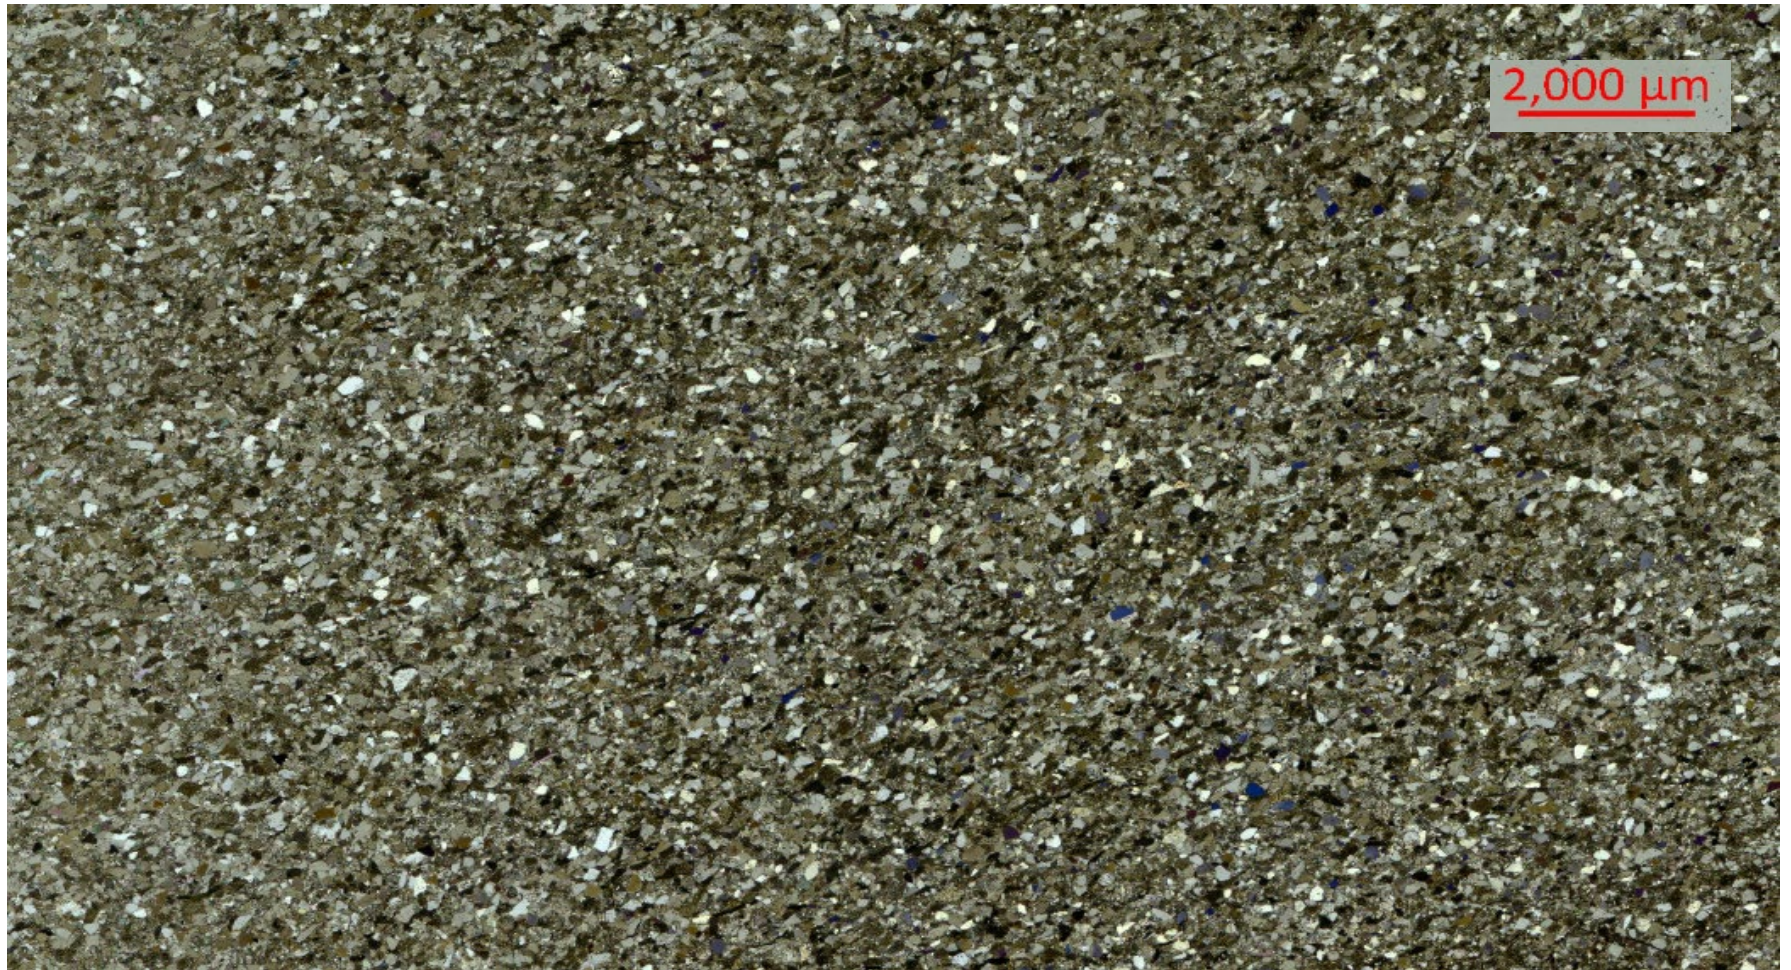



Sample 349-3

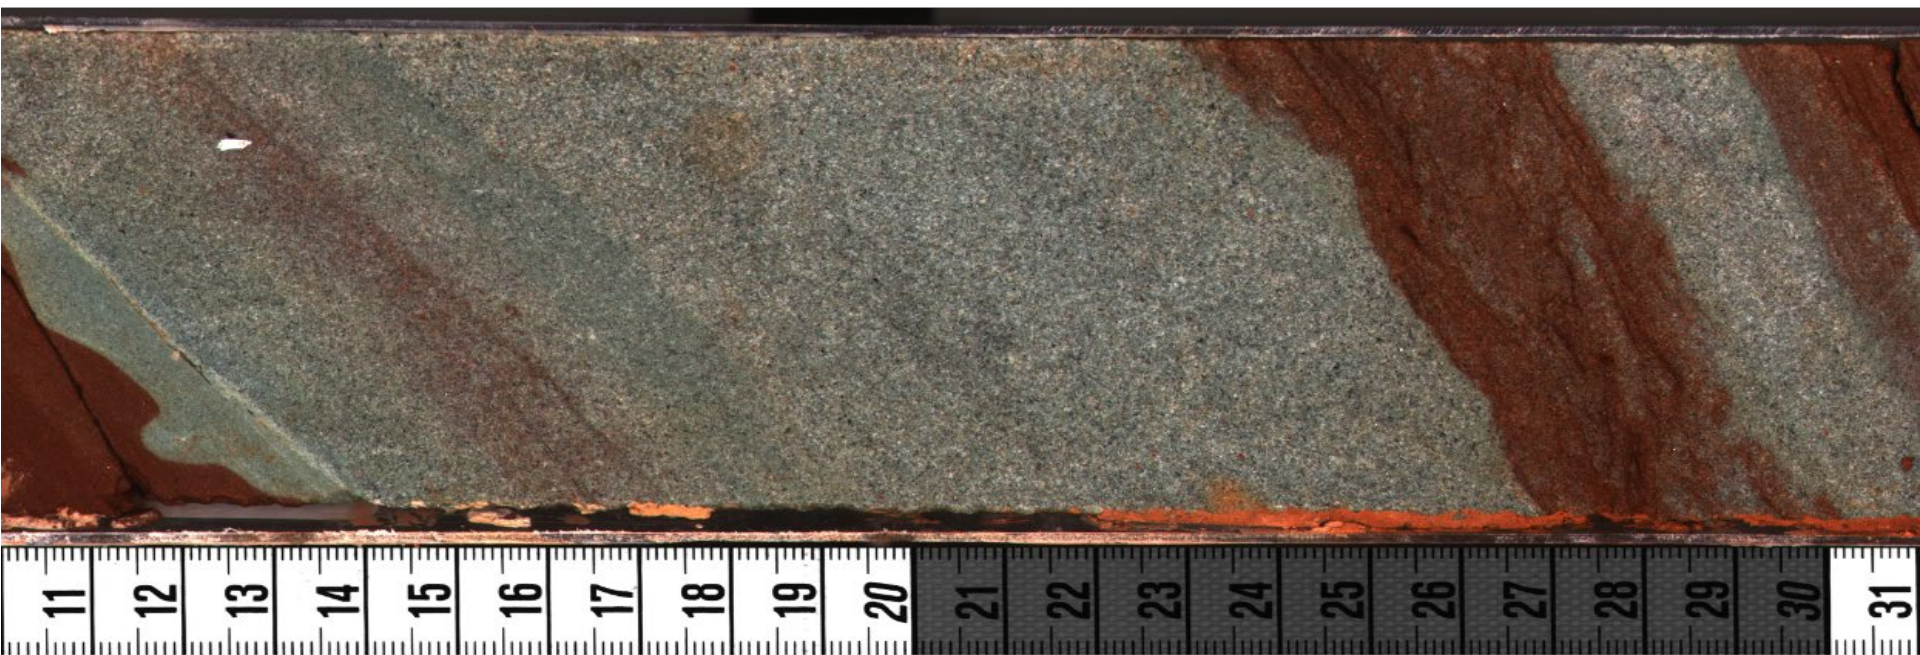



Sample 383-2

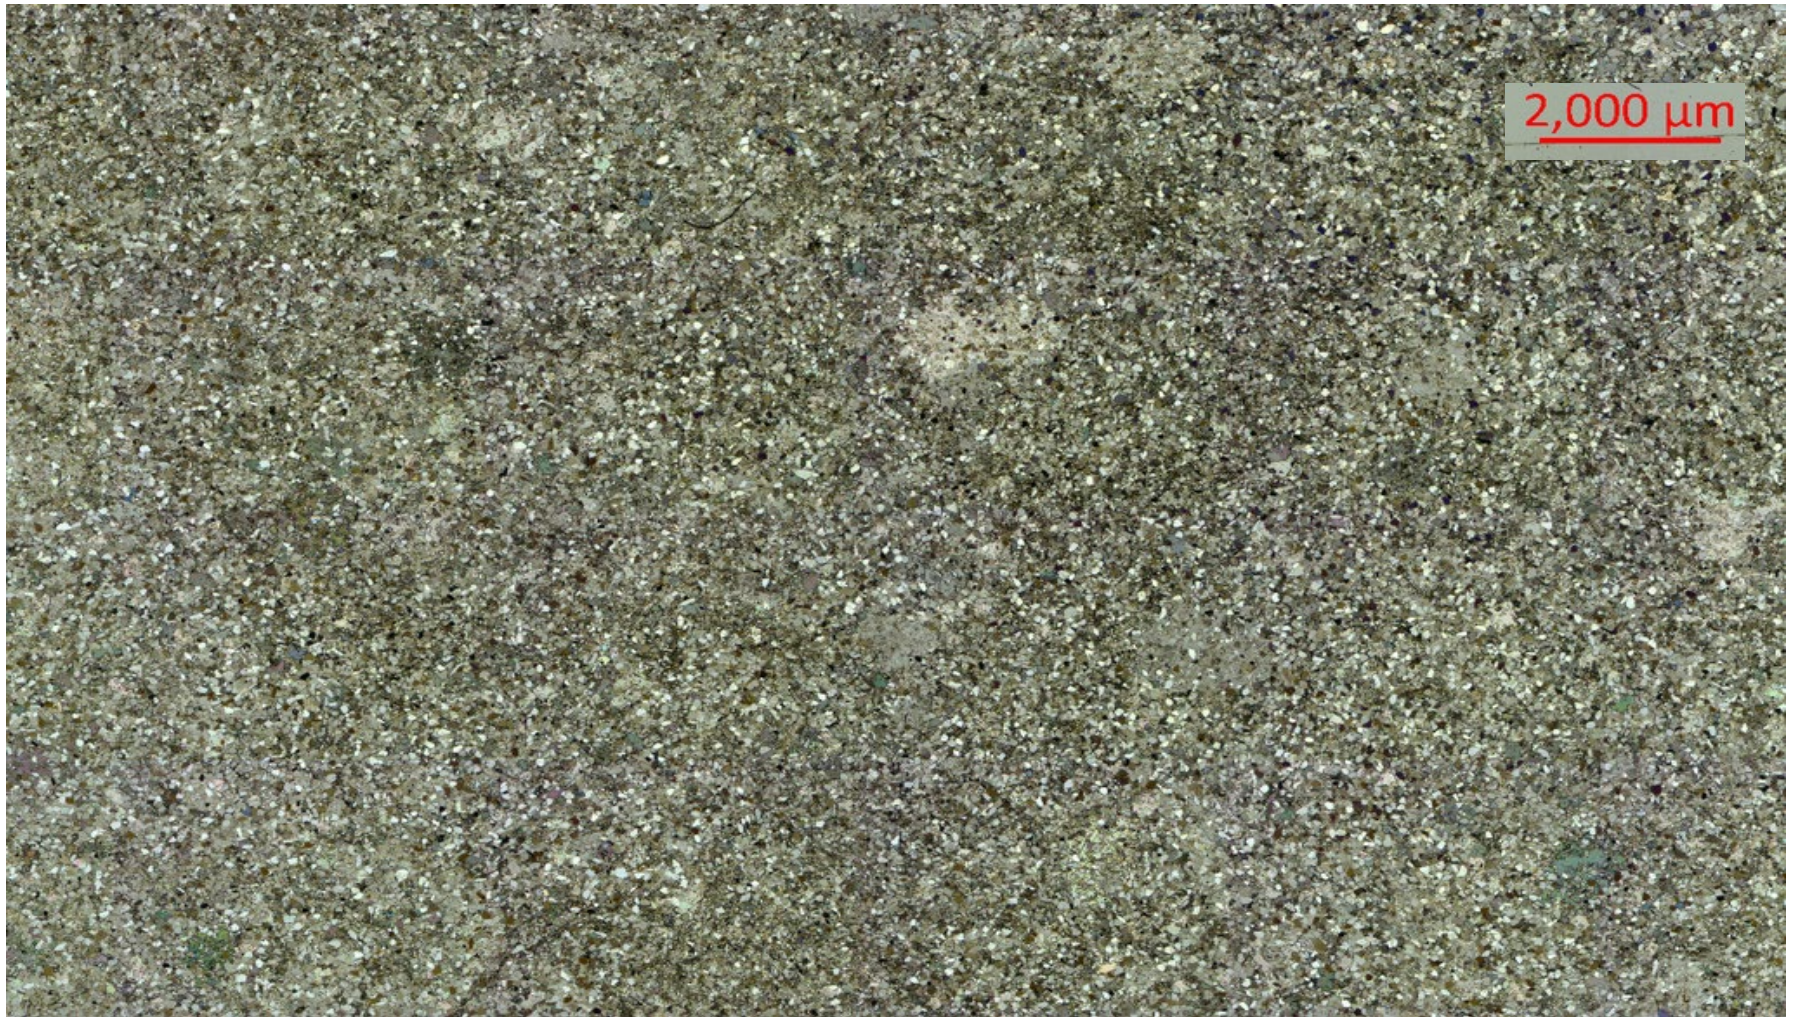



Sample 383-2

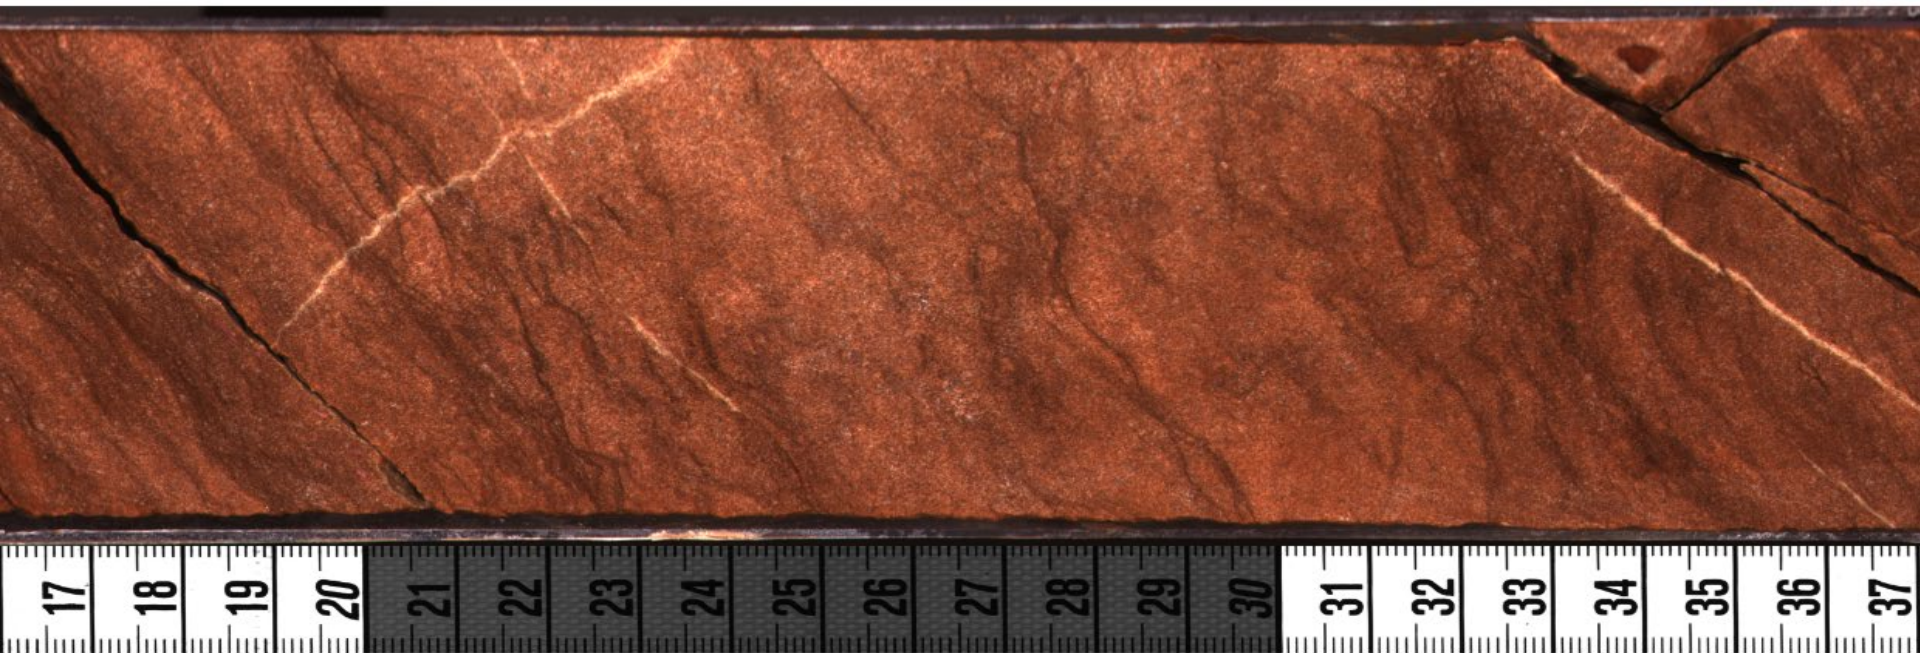



Sample 390-1

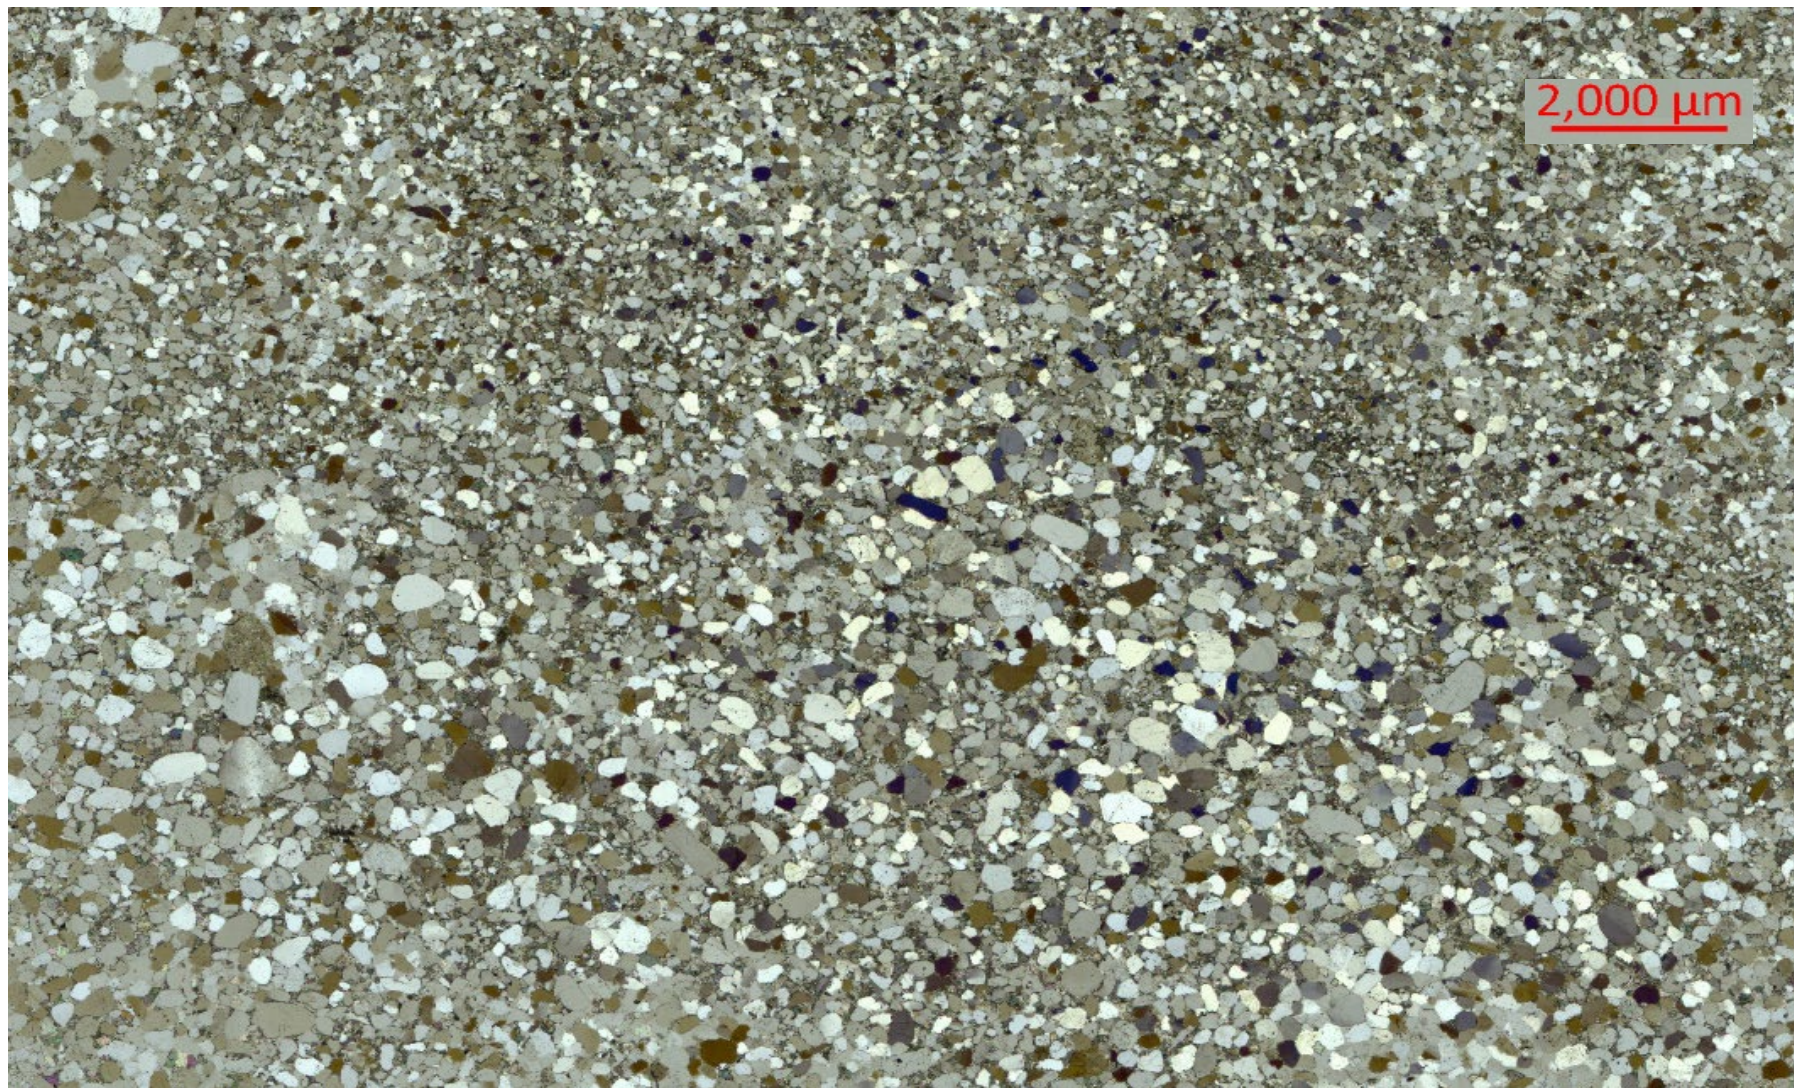



Sample 390-1

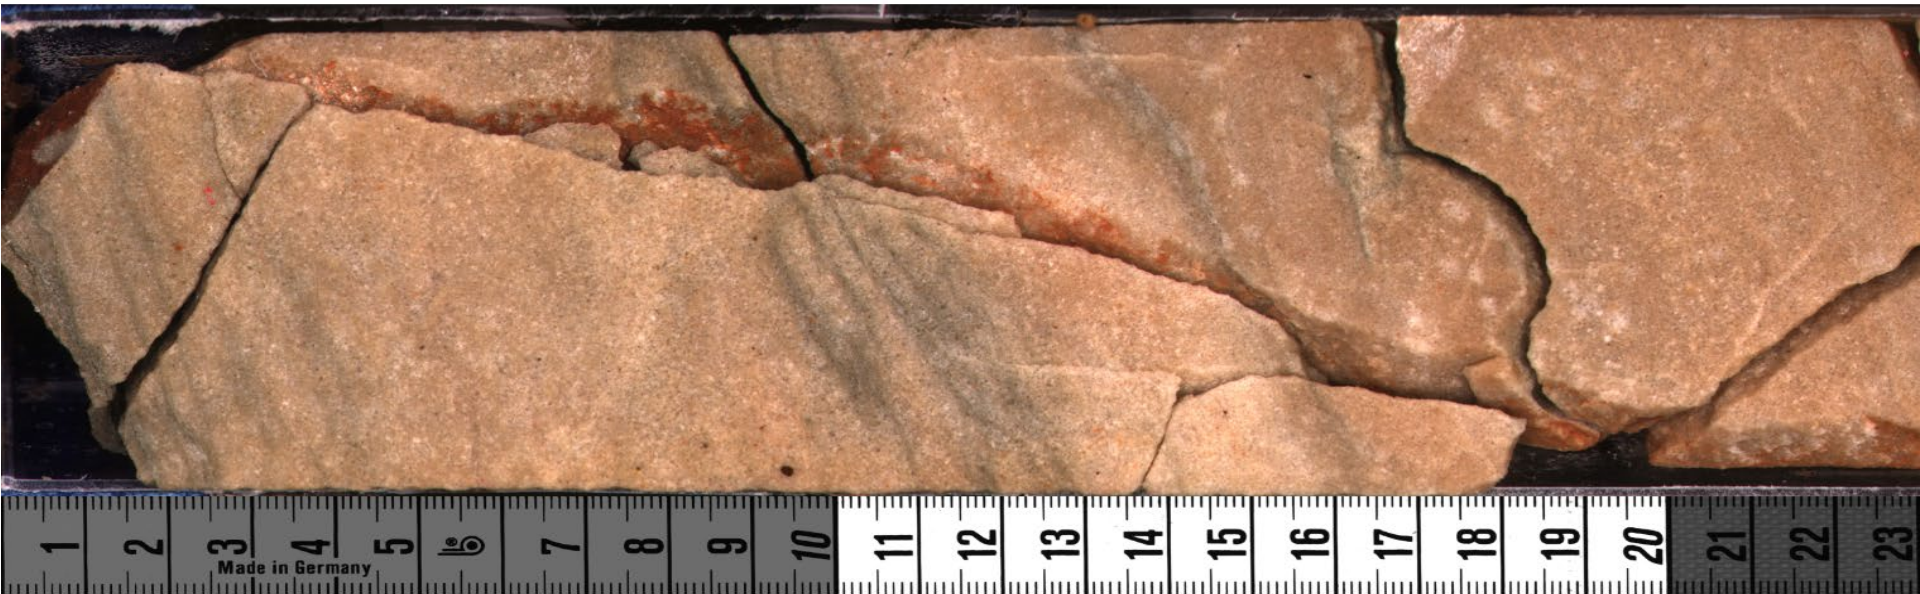

Supplement: Supplementary file 3 [file gchron-2-257-2020-supplement.zip]
