# Supplementary material for: LA-ICPMS U–Pb geochronology of detrital zircon grains from the Coconino, Moenkopi, and Chinle formations in the Petrified Forest National Park (Arizona)
Source: Copernicus journal article supplement (doi:10.5194/gchron-2-257-2020), 2020-09-23
Supplement: Supplementary file 1 [file gchron-2-257-2020-supplement.zip]

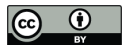

## *Supplement of*

# **LA-ICPMS U–Pb geochronology of detrital zircon grains from the Coconino, Moenkopi, and Chinle formations in the Petrified Forest National Park (Arizona)**

**George Gehrels et al.**

*Correspondence to:* George Gehrels (ggehrels@gmail.com)

- gchron-2-257-2020-supplement-title-page.pdf
- Sect.S1 (Sample Images).pdf
- Sect.S2 (CA-TIMS vs LA-ICPMS ages) v4.pdf
- Table S1 (Sample Descriptions).xlsx
- Table S2 (U-Pb Methods Table).xlsx
- Table S3 (U-Pb data).xlsx
- Table S4 (Intersample and Provenance Comparisons) KDE.xlsx
- Table S5 (Coconino Comparisons).xlsx
- Table S6 (Max Depo Ages).xlsx

The copyright of individual parts of the supplement might differ from the CC BY 4.0 License.
