# Supplementary figures and images for: LA-ICPMS U–Pb geochronology of detrital zircon grains from the Coconino, Moenkopi, and Chinle formations in the Petrified Forest National Park (Arizona)
Source: Copernicus journal article supplement (doi:10.5194/gchron-2-257-2020), 2020-09-23

# Appendix 2 (CA-TIMS vs LA-ICPMS ages)

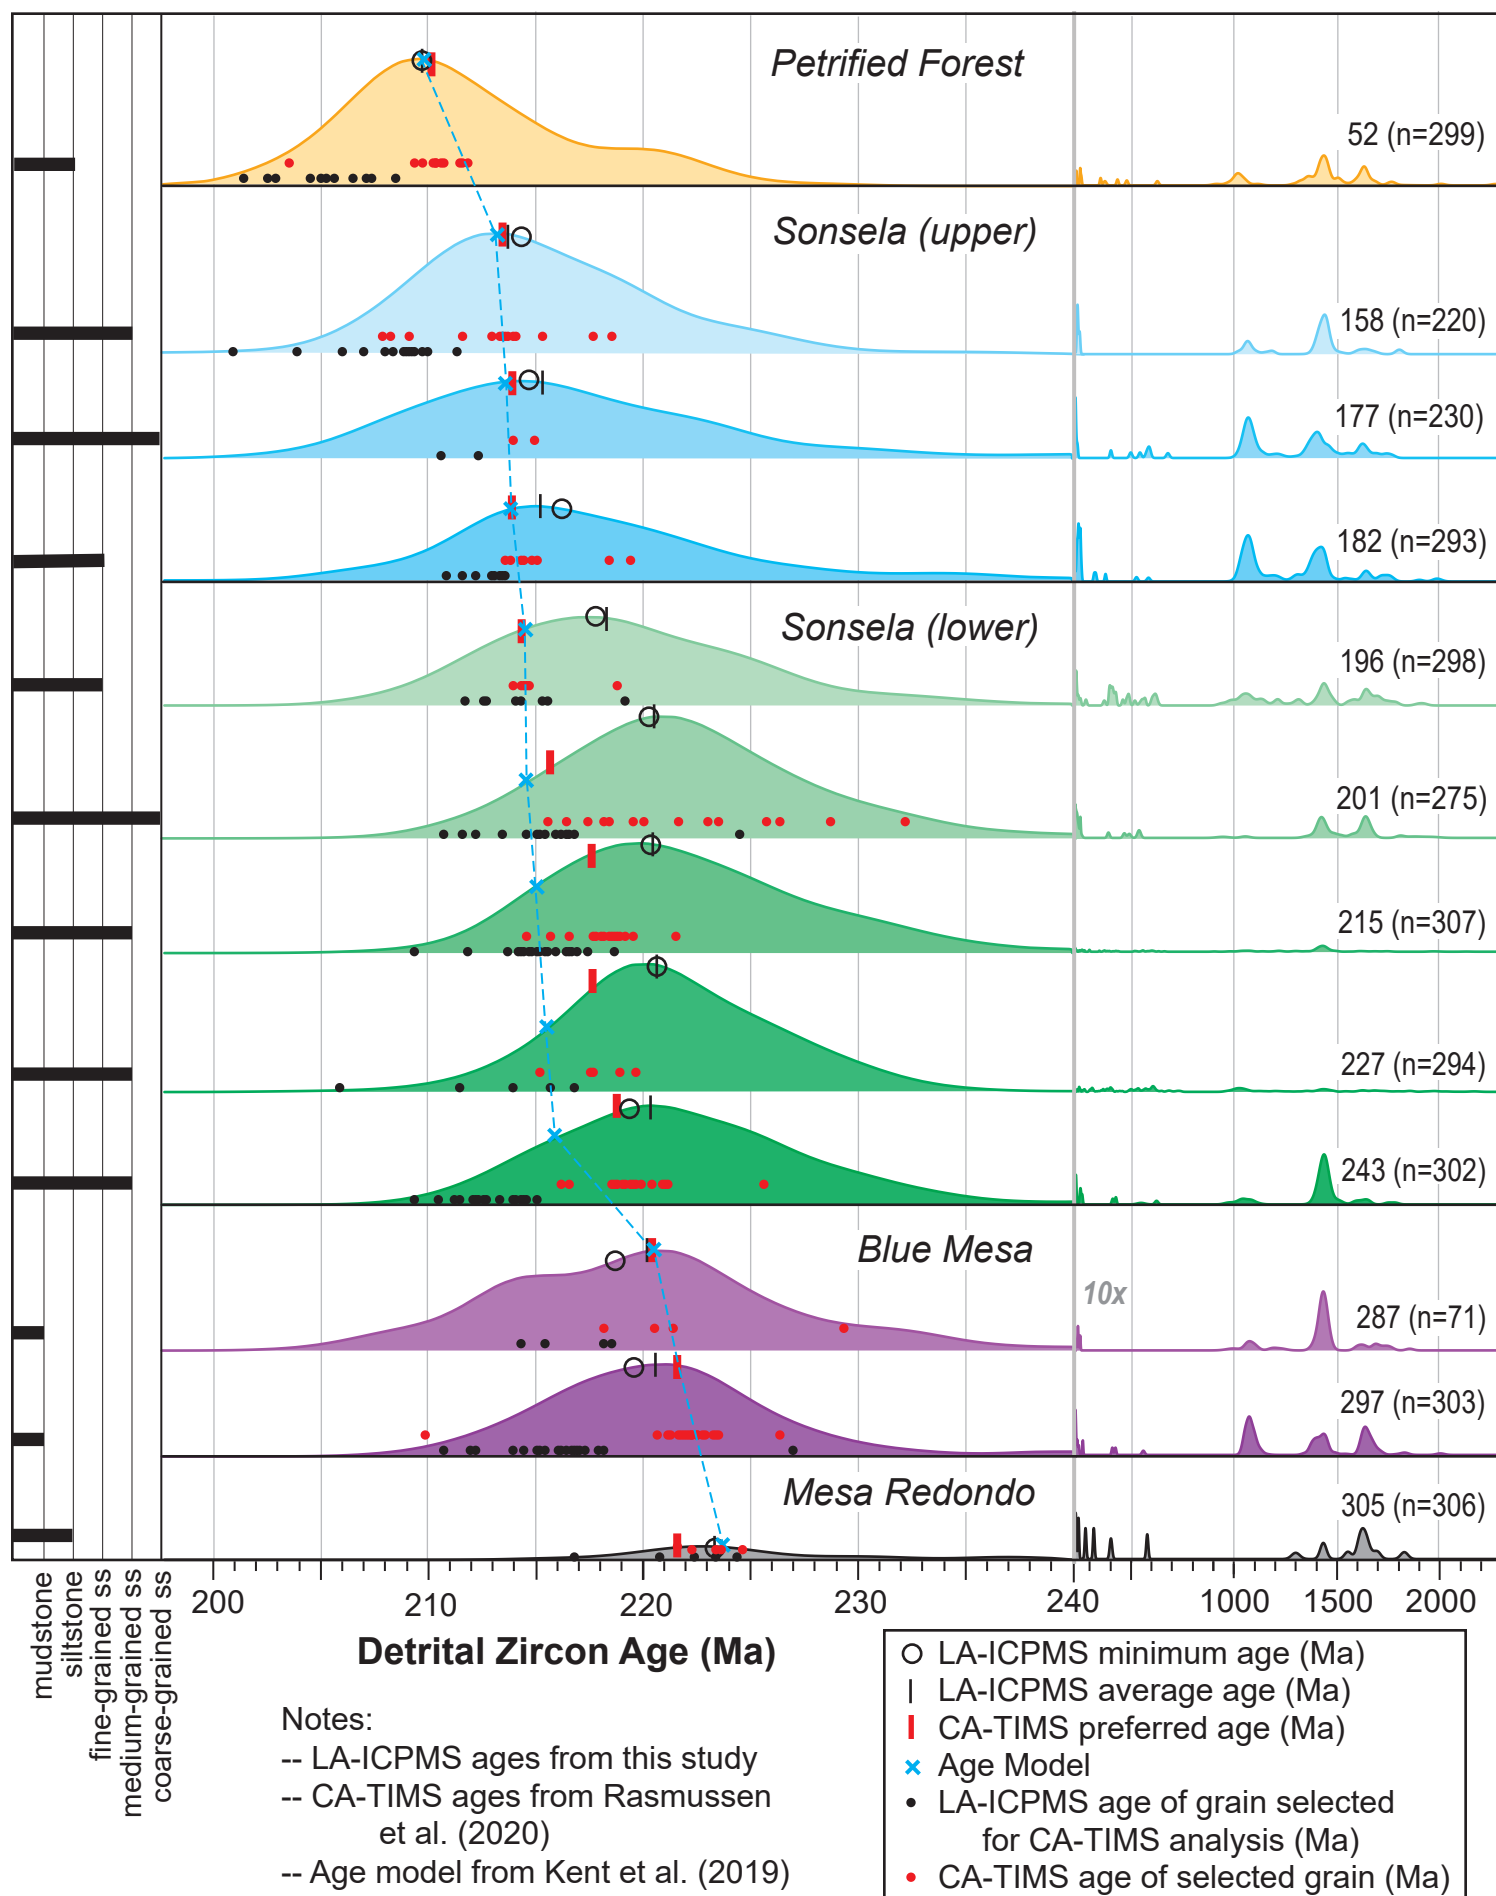

Supplement: Supplementary file 2 [file gchron-2-257-2020-supplement.zip]
